# Supplementary material for: Synthesis of cyclic β-1,6-oligosaccharides from glucosamine monomers by electrochemical polyglycosylation
Source: publisher site journal article supplement (doi:10.3762/bjoc.20.124), 2024-06-26

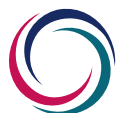

## Supporting Information

for

### Synthesis of cyclic $\beta$ -1,6-oligosaccharides from glucosamine monomers by electrochemical polyglycosylation

Md Azadur Rahman, Hirofumi Endo, Takashi Yamamoto, Shoma Okushiba,  
Norihiro Sasaki and Toshiki Nokami

*Beilstein J. Org. Chem.* **2024**, *20*, 1421–1427. doi:10.3762/bjoc.20.124

### Synthetic details, DFT calculations, and compound characterization data

## Contents

|                                                                                         |     |
|-----------------------------------------------------------------------------------------|-----|
| 1. General                                                                              | S2  |
| 2. Preparation of building blocks                                                       | S2  |
| 3. General procedure for cyclic oligoglucosamine with a phthalimide group               | S13 |
| 4. General procedure for cyclic oligoglucosamine with a 2,3-oxazolidinone group         | S17 |
| 5. General procedure for cyclic oligoglucosamines with an azido group                   | S18 |
| 6. Molecular orbital calculations for the anhydrosugar <b>15</b>                        | S21 |
| 7. References                                                                           | S23 |
| 8. $^1\text{H}$ and $^{13}\text{C}$ NMR spectra of monosaccharides and oligosaccharides | S24 |

## 1. General

All reactions were conducted under argon atmosphere except when otherwise noted.  $^1\text{H}$  NMR and  $^{13}\text{C}$  NMR spectra were recorded on a Bruker AVANCE II 600 (600 MHz for  $^1\text{H}$  and 150 MHz for  $^{13}\text{C}$ ) and a JEOL JNM-ECZ 600 (600 MHz for  $^1\text{H}$  and 150 MHz for  $^{13}\text{C}$ ). ESI-MS spectra were recorded on a Thermo Scientific Exactive spectrometer. MALDI-TOF MS spectra were recorded on Bruker Ultraflextreme spectrometer. Merck TLC (silica gel 60 F<sub>254</sub>) was used for TLC analysis. Gel permeation chromatography (GPC) was used with JAI Labo Ace LC-5060 recycling preparative HPLC (eluent:  $\text{CHCl}_3$ ). Kanto silica gel (spherical, neutral, 63–210  $\mu\text{m}$ ) was used. Starting materials **S1**,<sup>1</sup> **S4**,<sup>2</sup> **S5**,<sup>2</sup> and **S11**<sup>3</sup> were prepared according to the reported procedures. All reagents were purchased from commercial suppliers and used without extra purification. Products **7a**,<sup>4</sup> **7b**,<sup>5</sup> **7c**,<sup>6</sup> and **8a**<sup>7</sup> are known compounds, and NMR spectra of these compounds were compared with reported values.

## 2. Preparation of building blocks

Preparation of 4-chlorophenyl-2-deoxy-2-phthalimido-1-thio-6-*O*-trityl- $\beta$ -D-glucopyranoside (**S2**)

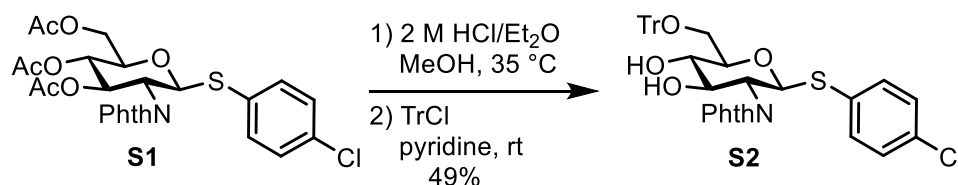

To a stirred solution of **S1**<sup>1</sup> (4.64 mmol, 2.61 g) in methanol (50 mL) at 35 °C was added 2 M HCl/Et<sub>2</sub>O (10 mL). After 2 hours, the progress of the reaction was checked by TLC analysis, and the solution was concentrated under reduced pressure to afford deacetylated sugar. Then, the crude product and trityl chloride (TrCl) (6.96 mmol, 1.94 g, 1.5 equiv) were dissolved in pyridine (20 mL). The reaction mixture was kept stirred overnight, at which point the TLC analysis indicated consumption of the starting material. The reaction was quenched with excessive methanol, and the solvent was removed under reduced pressure. The crude product was purified with silica gel chromatography (hexane/EtOAc 3:2) to obtain **S2** (2.29 mmol, 1.55 g, 49%) as a white solid.

4-Chlorophenyl-2-deoxy-2-phthalimido-1-thio-6-*O*-trityl- $\beta$ -D-glucopyranoside (**S2**): TLC (eluent: hexane/EtOAc 1:1)  $R_f$  = 0.22;  $^1\text{H}$  NMR ( $\text{CDCl}_3$ , 600 MHz)  $\delta$  7.92–7.82 (m, 2 H), 7.78–7.74 (m, 2 H), 7.49–7.45 (m, 6 H), 7.42–7.39 (m, 2 H), 7.36–7.32 (m, 6 H), 7.30–7.27 (m, 3 H), 7.21–7.18 (m, 2 H), 5.56 (d,  $J$  = 10.3 Hz, 1 H), 4.30 (ddd,  $J$  = 12.7, 8.6, 4.1 Hz, 1 H), 4.20 (*pseudo-t*,  $J$  = 10.3 Hz, 1 H), 3.62 (td,  $J$  = 8.8, 3.2 Hz, 1 H), 3.59–3.54 (m, 1 H), 3.53 (dd,  $J$  = 10.0, 4.0 Hz, 1 H), 3.45 (dd,  $J$  = 10.0, 4.5 Hz, 1 H), 2.50 (d,  $J$  = 3.2 Hz, 1 H), 2.36 (d,  $J$  = 4.3 Hz, 1 H);  $^{13}\text{C}$  NMR ( $\text{CDCl}_3$ , 150 MHz)  $\delta$  143.6, 134.4, 134.3, 130.3, 129.1, 128.6, 128.0, 127.3, 87.1, 83.2, 78.3, 72.9, 72.7, 63.6, 56.2; HRMS (ESI)  $m/z$  calcd for  $\text{C}_{39}\text{H}_{32}\text{ClKNO}_6\text{S}$ ;  $[\text{M}+\text{K}]^+$ , 716.1271, found 716.1211.

Preparation of 4-chlorophenyl-3,4-di-*O*-benzoyl-2-deoxy-2-phthalimido-6-*O*-trityl-1-thio- $\beta$ -D-glucopyranoside (**S3**)

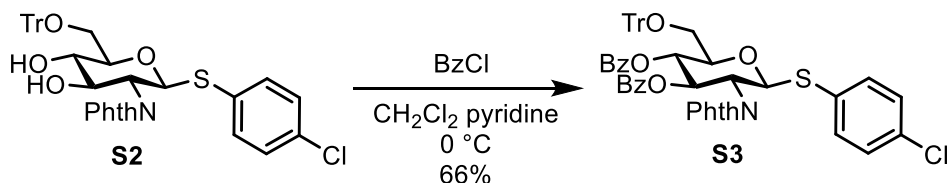

To a stirred solution of **S2** (2.19 mmol, 1.48 g) in  $\text{CH}_2\text{Cl}_2$  (25 mL) and pyridine (5.0 mL) was added benzyl chloride (BzCl) (11.0 mmol, 0.890 mL, 5.0 equiv) dropwise. The reaction was kept stirring over a period of 4 hours at 0 °C, and the progress of the reaction was checked by TLC analysis. The solution was concentrated under the reduced pressure. The mixture was diluted with in EtOAc (100 mL) and washed with 1 M HCl aqueous solution (50 mL  $\times$  2), saturated aqueous  $\text{NaHCO}_3$  solution (50 mL  $\times$  2), and brine (50 mL). The organic layer was dried over anhydrous  $\text{Na}_2\text{SO}_4$ , filtered and concentrated under reduced pressure to give the crude product. The crude product was purified with silica gel chromatography (hexane/EtOAc 3:1) to afford **S3** (1.45 mmol, 1.28 g, 66%) as a white solid.

4-Chlorophenyl-3,4-di-*O*-benzoyl-2-deoxy-2-phthalimido-6-*O*-trityl-1-thio- $\beta$ -D-glucopyranoside (**S3**): TLC (eluent: hexane/EtOAc 2:1)  $R_f$  = 0.55;  $^1\text{H}$  NMR ( $\text{CDCl}_3$ , 600 MHz)  $\delta$  7.92–7.88 (m, 2 H), 7.77–7.65 (m, 7 H), 7.55–7.52 (m, 2 H), 7.50–7.46 (m, 1 H), 7.44–7.40 (m, 6 H), 7.30–7.27 (m, 4 H), 7.24–7.22 (m, 2 H), 7.20–7.15 (m, 6 H), 7.14–7.12 (m, 3 H); 6.14 (dd,  $J$  = 10.3, 9.3 Hz, 1 H), 5.84 (d,  $J$  = 10.5 Hz, 1 H), 5.58 (*pseudo*-t,  $J$  = 9.8 Hz, 1 H), 4.61 (*pseudo*-t,  $J$  = 6.7 Hz, 1 H), 3.98 (ddd,  $J$  = 10.1, 5.3, 2.3 Hz, 1 H), 3.35 (dd,  $J$  = 11.0, 2.2 Hz, 1 H), 3.30 (dd,  $J$  = 10.6, 7.6 Hz, 1 H);  $^{13}\text{C}$  NMR ( $\text{CDCl}_3$ , 150 MHz)  $\delta$  168.1, 167.0, 165.8, 164.8, 143.6, 134.9, 134.8, 134.4, 134.3, 133.3, 133.1, 131.7, 129.8, 129.8, 129.7, 129.2, 129.0, 128.6, 128.6, 128.3, 128.2, 127.8, 127.0, 123.8, 123.7, 86.8, 83.2, 78.2, 72.4, 69.4, 62.4, 54.0; HRMS (ESI)  $m/z$  calcd for  $\text{C}_{53}\text{H}_{40}\text{ClKNO}_8\text{S}$ ;  $[\text{M}+\text{K}]^+$ , 924.1795, found 924.1733.

Preparation of 4-chlorophenyl-3,4-di-*O*-benzoyl-2-deoxy-2-phthalimido-1-thio- $\beta$ -D-glucopyranoside (**6a**)

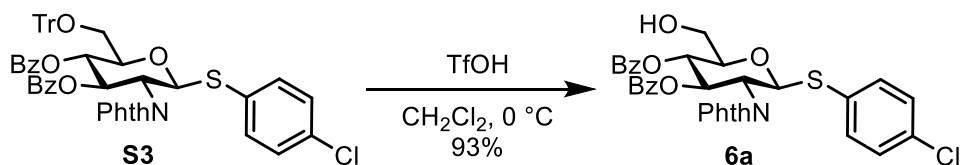

To a stirred solution of **S3** (1.49 mmol, 1.32 g) in  $\text{CH}_2\text{Cl}_2$  (20 mL) was added trifluoromethanesulfonic acid (TfOH) dropwise (1.63 mmol, 143  $\mu\text{L}$ , 1.1 equiv) at 0 °C. The reaction was kept stirring until the reaction complete (*ca.* 3 hours). The reaction was quenched with saturated aqueous  $\text{NaHCO}_3$  solution, and the solvent was removed under the reduced pressure. The reaction mixture was dissolved in EtOAc



(50 mL) and washed with H<sub>2</sub>O (50 mL × 3). The organic layer was dried over anhydrous Na<sub>2</sub>SO<sub>4</sub>, filtered and concentrated under reduced pressure to obtain the crude product. The crude product was purified with silica gel chromatography (hexane/EtOAc 3:1) to afford **6a** (1.38 mmol, 889 mg, 93%) as a white solid.

4-Chlorophenyl-3,4-di-*O*-benzoyl-2-deoxy-2-phthalimido-1-thio-β-D-glucopyranoside (**6a**): TLC (eluent: hexane/EtOAc 1:1) R<sub>f</sub> = 0.54; <sup>1</sup>H NMR (CDCl<sub>3</sub>, 600 MHz) δ 7.95–7.92 (m, 2 H), 7.92–7.87 (m, 1 H), 7.76–7.72 (m, 4 H), 7.72–7.67 (m, 1 H), 7.54–7.49 (m, 1 H), 7.45–7.35 (m, 5 H), 7.32–7.27 (m, 3 H), 7.26–7.24 (m, 1 H), 6.32 (*pseudo*-t, *J* = 9.8 Hz, 1 H), 5.85 (d, *J* = 10.7 Hz, 1 H), 5.49 (*pseudo*-t, *J* = 9.6 Hz, 1 H), 4.56 (*pseudo*-t, *J* = 10.2 Hz, 1 H) 3.95–3.85 (m, 2 H), 3.73 (dd, *J* = 8.0, 4.6 Hz, 1 H); 2.51 (*pseudo*-t, *J* = 7.9 Hz, 1 H); <sup>13</sup>C NMR (CDCl<sub>3</sub>, 150 MHz) δ 168.1, 166.9, 166.0, 165.7, 135.0, 134.8, 134.5, 134.3, 133.7, 133.4, 131.5, 131.1, 130.0, 129.7, 129.3, 129.3, 128.5, 128.5, 128.5, 128.4, 123.8, 83.1, 78.8, 71.7, 69.7, 61.5, 53.9; HRMS (ESI) *m/z* calcd for C<sub>34</sub>H<sub>26</sub>ClKNO<sub>8</sub>S; [M+K]<sup>+</sup>, 682.0700, found 682.0688.

Preparation of 4-chlorophenyl-3-*O*-acetyl-4-*O*-benzyl-2-deoxy-2-phthalimido-1-thio-β-D-glucopyranoside (**6b**)

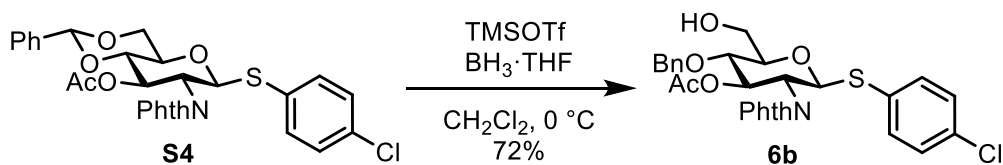

To a stirred solution of **S4**<sup>2</sup> (5.51 mmol, 3.12 g) in CH<sub>2</sub>Cl<sub>2</sub> (24 mL) was added BH<sub>3</sub>·THF (6.0 mL) at 0 °C. Then, trimethylsilyl trimethylsilyl trifluoromethanesulfonate (TMSOTf) (7.69 mmol, 1.39 mL, 1.4 equiv) was added dropwise. After 3 hours, the completion of the reaction was checked TLC analysis, and the reaction was quenched with saturated aqueous NaHCO<sub>3</sub> solution. Then, the solvent was removed under reduced pressure. The mixture was dissolved in EtOAc (100 mL) and washed with H<sub>2</sub>O (100 mL × 3). The organic layer was dried over anhydrous Na<sub>2</sub>SO<sub>4</sub>, filtered and concentrated under reduced pressure to give the crude product. The crude product was purified with silica gel chromatography (hexane/EtOAc 1:1) to obtain **6b** (3.97 mmol, 2.26 g, 72%) as a white solid.

4-Chlorophenyl-3-*O*-acetyl-4-*O*-benzyl-2-deoxy-2-phthalimido-1-thio-β-D-glucopyranoside (**6b**): TLC (eluent: hexane/EtOAc 1:1) R<sub>f</sub> = 0.48; <sup>1</sup>H NMR (CDCl<sub>3</sub>, 600 MHz) δ 7.90–7.83 (m, 2 H), 7.77–7.73 (m, 2 H), 7.35–7.31 (m, 4 H), 7.29–7.27 (m, 3 H), 7.25–7.23 (m, 2 H), 5.79 (*pseudo*-t, *J* = 9.5 Hz, 1 H), 5.74 (d, *J* = 5.3 Hz, 1 H), 4.67 (d, *J* = 11.4 Hz, 1 H), 4.64 (d, *J* = 11.5 Hz, 1 H), 4.21 (*pseudo*-t, *J* = 10.2 Hz, 1 H), 3.95 (dd, *J* = 11.6, 3.5 Hz, 1 H), 3.80–3.76 (m, 1 H), 3.76 (*pseudo*-t, *J* = 8.0 Hz, 1 H) 3.65 (m, 1 H), 1.83 (dd, *J* = 8.5, 5.5 Hz, 1 H), 1.76 (s, 3 H); <sup>13</sup>C NMR (CDCl<sub>3</sub>, 150 MHz) δ 170.1, 167.8, 167.3, 137.6, 134.7, 134.5, 134.4, 134.2, 131.6,

131.1, 129.6, 129.2, 128.5, 123.0, 127.8, 123.7, 123.6, 82.8, 79.5, 75.9, 74.8, 73.9, 61.7, 54.1, 20.5;  
HRMS (ESI)  $m/z$  calcd for  $C_{29}H_{26}ClKNO_7S$ ;  $[M+K]^+$ , 606.0751, found 606.0741.

Preparation of 4-chlorophenyl-3-*O*-benzyl-4,6-*O*-benzylidene-2-deoxy-2-phthalimido-1-thio- $\beta$ -D-glucopyranoside (**S6**)

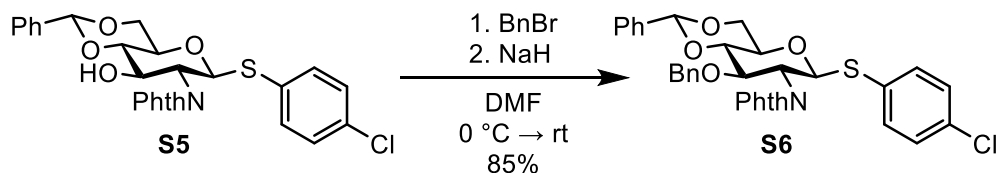

To a stirred solution of **S5**<sup>2</sup> (1.33 mmol, 0.696 g) in DMF (15 mL) was added benzyl bromide (BnBr) (4.00 mmol, 476  $\mu$ L) at 0 °C. Then, 60% sodium hydride (NaH) (160 mg, 4.00 mmol) in DMF (4 mL) was added dropwise. The reaction was kept stirring overnight and the progress of the reaction was checked by TLC analysis. The reaction was quenched with saturated aqueous  $NaHCO_3$  solution, and the solution was diluted with in EtOAc (50 mL) and washed with 1 M HCl aqueous solution (50 mL  $\times$  2), saturated aqueous  $NaHCO_3$  solution (50 mL  $\times$  2), and brine (50 mL). The organic layer was dried over anhydrous  $Na_2SO_4$ , filtered and concentrated under reduced pressure to give the crude product. The crude product was purified with silica gel chromatography (hexane/EtOAc 5:1) to afford **S6** (1.13 mmol, 0.690 g, 85%) as a white solid.

4-Chlorophenyl-3-*O*-benzyl-4,6-*O*-benzylidene-2-deoxy-2-phthalimido-1-thio- $\beta$ -D-glucopyranoside (**S6**): TLC (eluent: hexane/EtOAc 5:1)  $R_f$  = 0.39;  $^1H$  NMR (600 MHz,  $CDCl_3$ )  $\delta$  7.89–7.84 (m, 1 H), 7.77–7.70 (m, 2 H), 7.66–7.60 (m, 1 H), 7.53–7.48 (m, 2 H), 7.44–7.36 (m, 3 H), 7.33–7.28 (m, 2 H), 7.24–7.20 (m, 2 H), 6.98–6.95 (m, 2 H), 6.93–6.88 (m, 1 H), 6.87–6.84 (m, 2 H), 5.63 (s, 1 H), 5.60 (d,  $J$  = 10.6 Hz, 1 H), 4.75 (d,  $J$  = 12.3 Hz, 1 H), 4.48 (d,  $J$  = 12.4 Hz, 1 H), 4.42 (dd,  $J$  = 10.5, 4.9 Hz, 1 H), 4.40 (*pseudo-t*,  $J$  = 9.3 Hz, 1 H), 4.24 (*pseudo-t*,  $J$  = 10.3 Hz, 1 H), 3.83 (*pseudo-t*,  $J$  = 10.3 Hz, 1 H), 3.77 (*pseudo-t*,  $J$  = 9.1 Hz, 1 H), 3.70 (td,  $J$  = 9.7, 4.9 Hz, 1 H);  $^{13}C$  NMR (150 MHz,  $CDCl_3$ )  $\delta$  167.8, 167.2, 137.7, 137.3, 134.7, 134.6, 134.1, 134.0, 131.5, 129.7, 129.1, 128.3, 128.2, 128.1, 127.5, 126.1, 123.6, 123.4, 101.4, 83.8, 82.8, 75.4, 74.3, 70.4, 68.6, 54.7; HRMS (ESI)  $m/z$  calcd for  $C_{34}H_{28}ClKNO_6S$   $[M+Na]^+$ , 652.0958; found, 652.0943.

Preparation of 4-chlorophenyl-3,4-di-*O*-benzyl-2-deoxy-2-phthalimido-1-thio-β-*D*-glucopyranoside (**6c**)

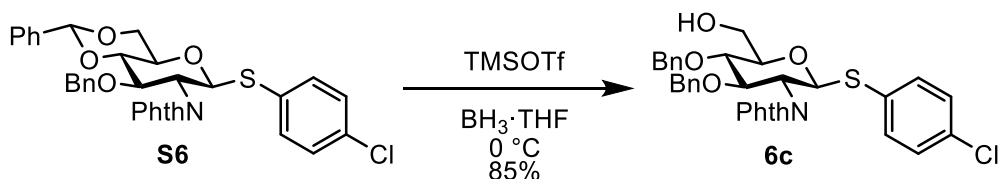

To a stirred solution of **S6** (1.38 mmol, .849 mg) and  $\text{BH}_3 \cdot \text{THF}$  (7.0 mL), TMSOTf (0.70 mL) was added dropwise at 0 °C. Then, the mixture was stirred for 4 hours at room temperature. The reaction was quenched with saturated aqueous  $\text{NaHCO}_3$  solution, and the solution was diluted in EtOAc. The mixture was washed with saturated aqueous  $\text{NaHCO}_3$  solution (3 times),  $\text{H}_2\text{O}$  (3 times) and brine respectively. The organic layer was dried over anhydrous  $\text{Na}_2\text{SO}_4$ , filtered, and concentrated under reduced pressure. The crude product was purified with silica gel chromatography (hexane/EtOAc 3:1) to give **6c** (1.17 mmol, 730 mg, 85%) as a white solid.

4-Chlorophenyl-3,4-di-*O*-benzyl-2-deoxy-2-phthalimido-1-thio-β-*D*-glucopyranoside (**6c**): TLC (eluent: hexane/EtOAc 2:1)  $R_f = 0.50$ ;  $^1\text{H}$  NMR (600 MHz,  $\text{CDCl}_3$ )  $\delta$  7.81–7.60 (m, 4 H), 7.37–7.32 (m, 4 H), 7.31–7.25 (m, 3 H), 7.20–7.18 (m, 2 H), 6.99–6.97 (m, 2 H), 6.89–6.82 (m, 3 H), 5.54 (d,  $J = 10.5$  Hz, 1 H), 4.87 (d,  $J = 10.8$  Hz, 1 H), 4.79 (d,  $J = 12.3$  Hz, 1 H), 4.72 (d,  $J = 10.8$  Hz, 1 H), 4.44 (d,  $J = 12.3$  Hz, 1 H), 4.37 (dd,  $J = 10.2, 9.0$  Hz, 1 H), 4.19 (*pseudo-t*,  $J = 10.5$  Hz, 1 H), 3.93 (dd,  $J = 12.3, 2.4$  Hz, 1 H), 3.76 (dd,  $J = 12.3, 4.5$  Hz, 1 H), 3.72–3.68 (m, 1 H), 3.59 (dd,  $J = 9.9, 2.4$  Hz, 1 H), 2.16–2.04 (m, 1 H);  $^{13}\text{C}$  NMR (150 MHz,  $\text{CDCl}_3$ )  $\delta$  168.2, 167.5, 138.0, 137.9, 134.3, 134.2, 134.1, 133.9, 131.7, 131.5, 130.6, 129.2, 128.7, 128.3, 128.2, 128.1, 127.6, 123.6, 123.6, 83.4, 80.2, 80.0, 79.3, 77.7, 77.5, 77.3, 75.2, 75.1, 61.8, 55.1; HRMS (ESI)  $m/z$  calcd for  $\text{C}_{34}\text{H}_{30}\text{ClNNaO}_6\text{S}$   $[\text{M}+\text{Na}]^+$ , 638.1375; found, 638.1357.

Preparation of 4-chlorophenyl-3-*O*-acetyl-4-*O*-benzyl-6-*O*-*tert*-butyldiphenylsilyl-2-deoxy-1-thio-β-*D*-glucopyranoside (**S7**)

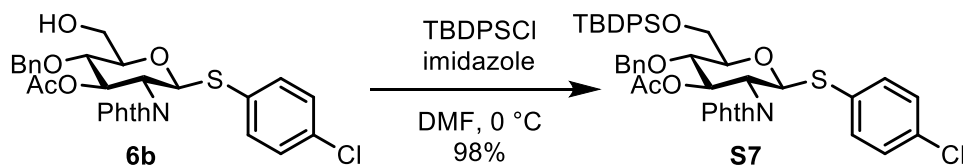

To a stirred solution of **6b** (3.61 mmol, 2.05 g) and imidazole (14.4 mmol, 1.06 g, 4.0 equiv) in DMF (15 mL) was added *tert*-butyldiphenylsilyl chloride (TBDPSCI) (10.8 mmol, 3.16 mL, 3.0 equiv) dropwise at 0 °C. The completion of the reaction was monitored by TLC analysis, and the reaction was quenched with saturated aqueous  $\text{NaHCO}_3$  solution. The mixture was dissolved in EtOAc (100 mL) and washed with 1 M HCl aqueous solution (100 mL  $\times$  2), saturated aqueous  $\text{NaHCO}_3$  solution (50 mL  $\times$  2), and brine (50 mL). The organic layer was dried over anhydrous  $\text{Na}_2\text{SO}_4$ , filtered and

concentrated under reduced pressure to give the crude product. The crude product was purified with silica gel chromatography (hexane/EtOAc 5:1) to afford **S7** (3.52 mmol, 2.84 g, 98%) as a white solid. 4-Chlorophenyl-3-*O*-acetyl-4-*O*-benzyl-6-*O*-*tert*-butyldiphenylsilyl-2-deoxy-1-thio- $\beta$ -D-glucopyranoside (**S7**): TLC (eluent: hexane/EtOAc 3:1)  $R_f$  = 0.47;  $^1\text{H}$  NMR ( $\text{CDCl}_3$ , 600 MHz)  $\delta$  7.90–7.85 (m, 2 H), 7.80–7.77 (m, 2 H), 7.76–7.74 (m, 2 H), 7.72–7.69 (m, 2 H), 7.46–7.43 (m, 2 H), 7.40–7.35 (m, 6 H), 7.26–7.23 (m, 3 H), 7.15–7.10 (m, 4 H), 5.80 (*pseudo*-t,  $J$  = 9.5 Hz, 1 H), 5.71 (d,  $J$  = 10.4 Hz, 1 H), 4.68 (d,  $J$  = 11.6 Hz, 1 H), 4.63 (d,  $J$  = 11.6 Hz, 1 H), 4.26 (*pseudo*-t,  $J$  = 10.3 Hz, 1 H), 4.05–4.01 (m, 1 H), 3.97 (dd,  $J$  = 11.7, 2.8 Hz, 1 H), 3.93 (*pseudo*-t,  $J$  = 9.5 Hz, 1 H), 3.65 (dd,  $J$  = 10.1, 1.3 Hz, 1 H), 1.76 (s, 3 H), 1.12 (s, 9 H);  $^{13}\text{C}$  NMR ( $\text{CDCl}_3$ , 150 MHz)  $\delta$  170.2, 167.9, 167.4, 137.9, 135.9, 135.6, 134.5, 134.4, 134.3, 134.2, 133.3, 132.8, 131.8, 131.2, 130.0, 129.8, 129.1, 128.5, 127.83, 127.79, 127.76, 127.5, 123.7, 123.6, 82.7, 80.1, 76.2, 74.9, 74.2, 62.5, 54.2, 26.9, 20.6, 19.4; HRMS (ESI)  $m/z$  calcd for  $\text{C}_{45}\text{H}_{44}\text{ClKNO}_7\text{SSi}$ ;  $[\text{M}+\text{K}]^+$ , 844.1928, found 844.1914.

Preparation of 4-chlorophenyl-2-amino-4-*O*-benzyl-6-*O*-*tert*-butyldiphenylsilyl-2-deoxy-1-thio- $\beta$ -D-glucopyranoside (**S8**)

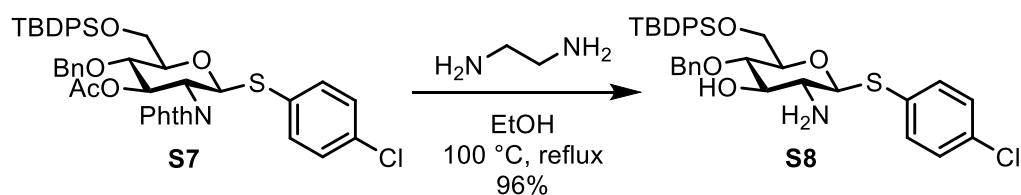

To a stirred solution of **S7** (3.82 mmol, 3.07 g) in ethanol (30 mL) was added ethylenediamine anhydrous (6.4 mL) at room temperature. The reaction temperature was gradually raised from room temperature to 100 °C and kept stirring. The progress of the reaction was checked by TLC analysis, and heating was halted in 3 hours. The solvent was removed under the reduced pressure, and the mixture was purified with silica gel chromatography (hexane/EtOAc 1:3 + 1%  $\text{Et}_3\text{N}$ ) to obtain **S8** (3.65 mmol, 2.31 g, 96%) as a white solid.

4-Chlorophenyl-2-amino-4-*O*-benzyl-6-*O*-*tert*-butyldiphenylsilyl-2-deoxy-1-thio- $\beta$ -D-glucopyranoside (**S8**): TLC (eluent: hexane/EtOAc 1:3)  $R_f$  = 0.38;  $^1\text{H}$  NMR ( $\text{CDCl}_3$ , 600 MHz)  $\delta$  7.79–7.76 (m, 2 H), 7.73–7.70 (m, 2 H), 7.51–7.48 (m, 2 H), 7.45–7.40 (m, 2 H), 7.37–7.33 (m, 4 H), 7.32–7.27 (m, 3 H), 7.25–7.22 (m, 2 H), 7.17–7.13 (m, 2 H), 4.80 (d,  $J$  = 11.2 Hz, 1 H), 4.71 (d,  $J$  = 11.2 Hz, 1 H), 4.40 (d,  $J$  = 9.9 Hz, 1 H), 4.03–3.99 (m, 1 H), 3.95 (dd,  $J$  = 11.2, 3.9 Hz, 1 H), 3.64 (*pseudo*-t,  $J$  = 9.3 Hz, 1 H), 3.48 (*pseudo*-t,  $J$  = 9.2 Hz, 1 H), 3.41 (dd,  $J$  = 9.8, 2.5 Hz, 1 H), 2.69 (*pseudo*-t,  $J$  = 9.6 Hz, 1 H), 1.10 (s, 9 H);  $^{13}\text{C}$  NMR ( $\text{CDCl}_3$ , 150 MHz)  $\delta$  138.3, 135.9, 135.6, 134.0, 133.6, 133.4, 133.0, 131.2, 129.8, 129.7, 129.1, 128.6, 127.9, 127.9, 127.8, 127.7, 89.3, 80.0, 78.3, 77.5, 74.8, 62.9, 56.1, 26.9, 19.4; HRMS (ESI)  $m/z$  calcd for  $\text{C}_{35}\text{H}_{40}\text{ClINNaO}_4\text{SSi}$ ;  $[\text{M}+\text{Na}]^+$ , 656.2029, found 656.2006.

Preparation of 4-chlorophenyl-4-*O*-benzyl-6-*O*-*tert*-butyldiphenylsilyl-2,3-*N,O*-carbonyl-2-deoxy-1-thio- $\beta$ -D-glucopyranoside (**S9**)

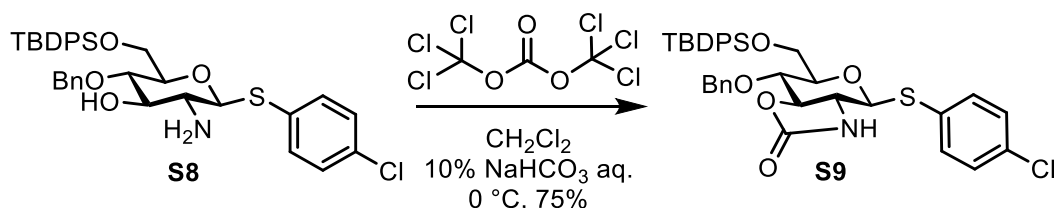

To a stirred solution of **S8** (3.59 mmol, 2.28 g) in  $\text{CH}_2\text{Cl}_2$  (50 mL) and 10% aqueous  $\text{NaHCO}_3$  solution was added triphosgene (1.38 mmol, 408 mg, 0.383 equiv) at room temperature. The reaction was kept stirring for overnight. The completion of the reaction was checked by TLC analysis, then the solution was extracted with  $\text{CH}_2\text{Cl}_2$  (50 mL  $\times$  3). The organic layer was dried over anhydrous  $\text{Na}_2\text{SO}_4$ , filtered and concentrated under reduced pressure. The crude product was purified with silica gel chromatography (hexane/EtOAc = 5:1) to obtain **S9** (2.69 mmol, 1.78 g, 75%) as a white solid.

4-Chlorophenyl-4-*O*-benzyl-6-*O*-*tert*-butyldiphenylsilyl-2,3-*N,O*-carbonyl-2-deoxy-1-thio- $\beta$ -D-glucopyranoside (**S9**): TLC (eluent: hexane/EtOAc 3:1)  $R_f$  = 0.46;  $^1\text{H}$  NMR ( $\text{CDCl}_3$ , 600 MHz)  $\delta$  7.75–7.72 (m, 2 H), 7.71–7.68 (m, 2 H), 7.50–7.47 (m, 2 H), 7.45–7.42 (m, 2 H), 7.38–7.33 (m, 4 H), 7.30–7.28 (m, 3 H), 7.25–7.18 (m, 4 H), 5.00 (s, 1 H), 4.88 (d,  $J$  = 10.5 Hz, 1 H), 4.73 (d,  $J$  = 11.2 Hz, 1 H), 4.57 (d,  $J$  = 11.0 Hz, 1 H), 4.28 (*pseudo*-t,  $J$  = 10.4 Hz, 1 H), 4.04 (*pseudo*-t,  $J$  = 9.4 Hz, 1 H), 4.00–3.7 (m, 2 H), 3.56 (dd,  $J$  = 8.7, 3.0 Hz, 1 H), 3.44 (*pseudo*-t,  $J$  = 10.6 Hz, 1 H) 1.07 (s, 9 H);  $^{13}\text{C}$  NMR ( $\text{CDCl}_3$ , 150 MHz)  $\delta$  159.0, 137.2, 135.7, 135.6, 135.1, 134.6, 133.2, 133.0, 129.8, 129.4, 129.1, 128.5, 128.0, 128.0, 127.8, 127.8, 85.4, 84.2, 81.3, 73.5, 73.2, 62.4, 58.5, 26.8, 19.4; HRMS (ESI)  $m/z$  calcd for  $\text{C}_{36}\text{H}_{38}\text{ClKNO}_5\text{SSi}$ ;  $[\text{M}+\text{K}]^+$ , 698.1561, found 698.1538.

Preparation of 4-chlorophenyl-2-acetamido-4-*O*-benzyl-6-*O*-*tert*-butyldiphenylsilyl-2,3-*N,O*-carbonyl-2-deoxy-1-thio- $\beta$ -D-glucopyranoside (**S10**)

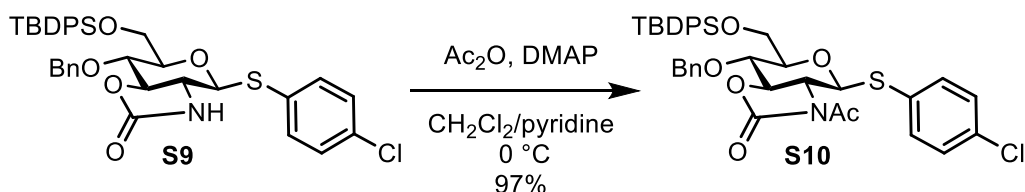

To a stirred solution of **S9** (2.54 mmol, 1.68 g) and 4-dimethylaminopyridine (DMAP) (1.27 mmol, 154 mg, 0.5 equiv) in  $\text{CH}_2\text{Cl}_2$  (15 mL) and pyridine (3.0 mL) was added acetic anhydride (5.0 mL) at 0 °C. The reaction was monitored by TLC analysis and quenched with methanol after the completion (*ca.* 2 hours). The solvent was removed under reduced pressure. The mixture was diluted with in EtOAc (50 mL) and washed with 1 M HCl aqueous solution (50 mL  $\times$  3), saturated aqueous  $\text{NaHCO}_3$  solution (50 mL  $\times$  3), and brine (50 mL). The organic layer was dried over anhydrous  $\text{Na}_2\text{SO}_4$ , filtered

and concentrated under reduced pressure to give the purified product **S10** (2.46 mmol, 1.72 g, 97%) as a white solid.

4-Chlorophenyl-2-acetamido-4-*O*-benzyl-6-*O*-*tert*-butyldiphenylsilyl-2,3-*N,O*-carbonyl-2-deoxy-1-thio- $\beta$ -D-glucopyranoside (**S10**): TLC (eluent: hexane/EtOAc 3:1)  $R_f$  = 0.67;  $^1\text{H}$  NMR ( $\text{CDCl}_3$ , 600 MHz)  $\delta$  7.75–7.70 (m, 2 H), 7.68–7.65 (m, 2H), 7.45–7.40 (m, 4 H), 7.39–7.34 (m, 4 H), 7.31–7.28 (m, 3 H), 7.25–7.20 (m, 2 H), 7.16–7.13 (m, 2 H), 4.88 (d,  $J$  = 11.2 Hz, 1 H), 4.82 (d,  $J$  = 8.5 Hz, 1 H), 4.60 (d,  $J$  = 11.5 Hz, 1 H), 4.27 (*pseudo*-t,  $J$  = 10.6 Hz, 1 H), 4.11–4.95 (m, 2 H), 3.92 (dd,  $J$  = 11.4, 4.2 Hz, 1 H), 3.88–3.84 (m, 1 H), 3.49 (dd,  $J$  = 8.2, 2.3 Hz, 1 H), 2.60 (s, 3 H), 1.05 (s, 9 H);  $^{13}\text{C}$  NMR ( $\text{CDCl}_3$ , 150 MHz)  $\delta$  173.2, 154.0, 137.0, 135.8, 135.6, 134.1, 133.6, 133.2, 132.8, 132.7, 129.9, 129.8, 129.0, 128.5, 128.1, 128.0, 127.8, 127.8, 87.0, 82.8, 81.2, 74.0, 73.6, 62.5, 59.8, 26.9, 24.9, 19.3; HRMS (ESI)  $m/z$  calcd for  $\text{C}_{38}\text{H}_{40}\text{ClKNO}_6\text{SSi}$ ;  $[\text{M}+\text{K}]^+$ , 740.1666, found 740.1654.

Preparation of 4-chlorophenyl-2-acetamido-4-*O*-benzyl-2,3-*N,O*-carbonyl-2-deoxy-1-thio- $\beta$ -D-glucopyranoside (**14**)

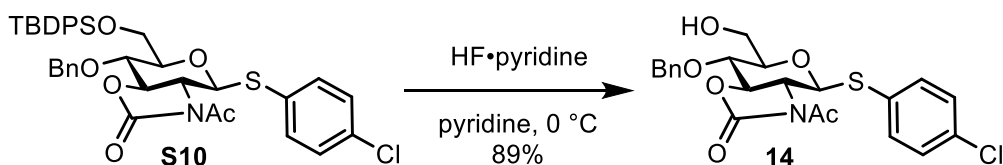

To a stirred solution of **S10** (2.32 mmol, 1.63 g) in pyridine (20 mL) was added HF/pyridine (19.2 mmol, 2.53 mL, 8.3 equiv) dropwise at 0 °C. The reaction was monitored by TLC analysis and quenched with saturated aqueous  $\text{NaHCO}_3$  solution when the reaction completed. The mixture was diluted with in EtOAc (50 mL) and washed with 1 M HCl aqueous solution (50 mL  $\times$  3), saturated aqueous  $\text{NaHCO}_3$  solution (50 mL  $\times$  3), and brine (50 mL). The organic layer was dried over anhydrous  $\text{Na}_2\text{SO}_4$ , filtered and concentrated under reduced pressure to obtain the crude product. The crude product was purified with silica gel chromatography to afford **14** (2.07 mmol, 963 mg, 89%) as a white solid.

4-Chlorophenyl-2-acetamido-4-*O*-benzyl-2,3-*N,O*-carbonyl-2-deoxy-1-thio- $\beta$ -D-glucopyranoside (**14**): TLC (eluent: hexane/EtOAc 3:1)  $R_f$  = 0.36;  $^1\text{H}$  NMR ( $\text{CDCl}_3$ , 600 MHz)  $\delta$  7.43–7.40 (m, 2 H), 7.39–7.35 (m, 2 H), 7.35–7.30 (m, 3 H), 7.30–7.27 (m, 2 H), 4.894 (d,  $J$  = 11.0 Hz, 1 H), 4.892 (d,  $J$  = 8.6 Hz, 1 H), 4.63 (d,  $J$  = 11.4 Hz, 1 H), 4.38 (*pseudo*-t,  $J$  = 10.7 Hz, 1 H), 4.03 (dd,  $J$  = 11.3, 8.8 Hz, 1 H), 3.93 (*pseudo*-t,  $J$  = 9.3 Hz, 1 H), 3.82 (ddd,  $J$  = 11.5, 6.4, 2.2 Hz, 1 H), 3.72 (ddd,  $J$  = 13.7, 7.7, 4.5 Hz, 1 H), 3.52–3.46 (m, 1 H), 2.59 (s, 3 H), 1.84 (*pseudo*-t,  $J$  = 7.0 Hz, 1 H);  $^{13}\text{C}$  NMR ( $\text{CDCl}_3$ , 150 MHz)  $\delta$  173.1, 153.7, 136.9, 134.4, 133.5, 132.1, 129.2, 128.6, 128.3, 128.1, 86.7, 82.5, 80.7, 73.7, 73.5, 61.5, 59.8, 24.8; HRMS (ESI)  $m/z$  calcd for  $\text{C}_{22}\text{H}_{22}\text{ClKNO}_6\text{S}$ ;  $[\text{M}+\text{K}]^+$ , 502.0488, found 502.0474.

Preparation of 4-chlorophenyl-3-*O*-acetyl-2-azido-4,6-*O*-benzylidene-2-deoxy-1-thio-β-*D*-glucopyranoside (**S12**)

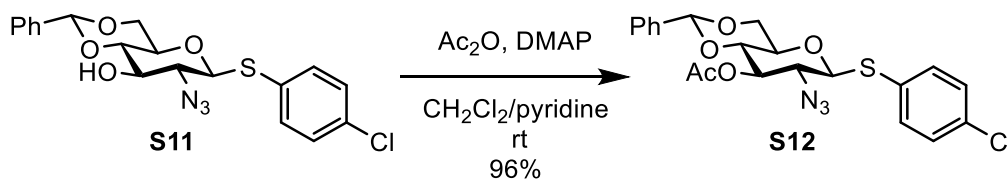

To a stirred solution of **S11**<sup>3</sup> (6.45 mmol, 2.70 g) and DMAP (84 mg) in CH<sub>2</sub>Cl<sub>2</sub> (24 mL) and pyridine (7.0 mL), acetic anhydride (4.0 mL) was added dropwise. Then, the mixture was stirred overnight at room temperature. The reaction was quenched with 1 M HCl aqueous solution, and the mixture was diluted in EtOAc, and the organic solution was washed with 1 M HCl aqueous solution (3 times), saturated aqueous NaHCO<sub>3</sub> solution (3 times), H<sub>2</sub>O (3 times), and brine respectively. The organic layer was dried over anhydrous Na<sub>2</sub>SO<sub>4</sub>, filtered, and concentrated under reduced pressure. The crude product was purified with silica gel chromatography (hexane/EtOAc 4:1) to afford **S12** (6.20 mmol, 2.89 g, 96%) as a white solid.

4-Chlorophenyl-3-*O*-acetyl-2-azido-4,6-*O*-benzylidene-2-deoxy-1-thio-β-*D*-glucopyranoside (**S12**): TLC (eluent: hexane/EtOAc 3:1) *R*<sub>f</sub> = 0.50; <sup>1</sup>H NMR (600 MHz, CDCl<sub>3</sub>) δ 7.50–7.48 (m, 2 H), 7.44–7.30 (m, 7 H), 5.45 (s, 1 H), 5.27 (*pseudo-t*, *J* = 9.6 Hz, 1 H), 4.55 (d, *J* = 10.2 Hz, 1 H), 4.32 (dd, *J* = 10.5, 4.8 Hz, 1 H), 3.72 (*pseudo-t*, *J* = 10.2 Hz, 1 H), 3.51 (*pseudo-t*, *J* = 9.6 Hz, 1 H), 3.46 (td, *J* = 9.6, 4.8, Hz, 1 H), 3.40 (*pseudo-t*, *J* = 9.9 Hz, 1 H), 2.10 (s, 3 H); <sup>13</sup>C NMR (150 MHz, CDCl<sub>3</sub>) δ 169.6, 137.0, 135.2, 135.2, 129.5, 129.3, 128.4, 126.3, 101.5, 86.6, 78.3, 77.7, 77.5, 77.3, 73.0, 70.7, 68.3, 63.6, 20.9; HRMS (ESI) *m/z* calcd for C<sub>21</sub>H<sub>20</sub>ClKN<sub>3</sub>O<sub>5</sub>S [M+K]<sup>+</sup>, 500.0444; found, 500.0425.

Preparation of 4-chlorophenyl-3-*O*-acetyl-2-azido-4-*O*-benzyl-2-deoxy-1-thio-β-*D*-glucopyranoside (**17a**)

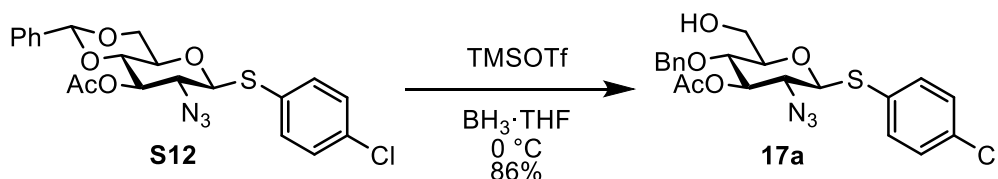

To a stirred solution of **S12** (1.37 mmol, 0.630 g), and BH<sub>3</sub>·THF (7.0 mL), TMSOTf (0.70 mL) was added dropwise at 0 °C. Then, the mixture was stirred for 4 hours at room temperature. The reaction was quenched with saturated aqueous NaHCO<sub>3</sub> solution. The mixture was diluted in EtOAc, and the organic solution was washed with saturated aqueous NaHCO<sub>3</sub> solution (3 times), H<sub>2</sub>O (3 times) and brine respectively. The organic layer was dried over anhydrous Na<sub>2</sub>SO<sub>4</sub>, filtered, and concentrated under reduced pressure. The crude product was purified with silica gel chromatography (hexane/EtOAc 5:1) to afford **17a** (1.19 mmol, 0.550 g, 86%) as a white solid.

4-Chlorophenyl-3-*O*-acetyl-2-azido-4-*O*-benzyl-2-deoxy-1-thio-β-*D*-glucopyranoside (**17a**): TLC

(eluent: hexane/EtOAc 2:1)  $R_f$  = 0.47;  $^1\text{H}$  NMR (600 MHz,  $\text{CDCl}_3$ )  $\delta$  7.49–7.46 (m, 2 H), 7.34–7.28 (m, 5 H), 7.26–7.24 (m, 2 H), 5.15 (*pseudo*-t,  $J$  = 9.6 Hz, 1 H), 4.61 (d,  $J$  = 11.4 Hz, 1 H), 4.56 (d,  $J$  = 11.4 Hz, 1 H), 4.49 (d,  $J$  = 10.2 Hz, 1 H), 3.89 (ddd,  $J$  = 12.3, 5.4, 2.4 Hz, 1 H), 3.74–3.70 (m, 1 H), 3.57 (*pseudo*-t,  $J$  = 9.6 Hz, 1 H), 3.41 (ddd,  $J$  = 9.9, 3.9, 2.7 Hz, 1 H), 3.26 (*pseudo*-t,  $J$  = 9.9 Hz, 1 H), 2.00 (s, 3 H), 1.88 (dd,  $J$  = 8.0, 5.2 Hz, 1 H);  $^{13}\text{C}$  NMR (150 MHz,  $\text{CDCl}_3$ )  $\delta$  169.9, 137.4, 135.2, 135.0, 129.5, 129.4, 128.7, 128.2, 128.1, 86.1, 79.7, 77.3, 77.1, 76.9, 75.9, 75.1, 74.8, 63.4, 61.6, 20.9; HRMS (ESI)  $m/z$  calcd for  $\text{C}_{21}\text{H}_{22}\text{ClNaN}_3\text{O}_5\text{S}$   $[\text{M}+\text{Na}]^+$ , 486.0861; found, 486.0842.

Preparation of 4-chlorophenyl-2-azido-3-*O*-benzyl-4,6-*O*-benzylidene-2-deoxy-1-thio- $\beta$ -D-glucopyranoside (**S13**)

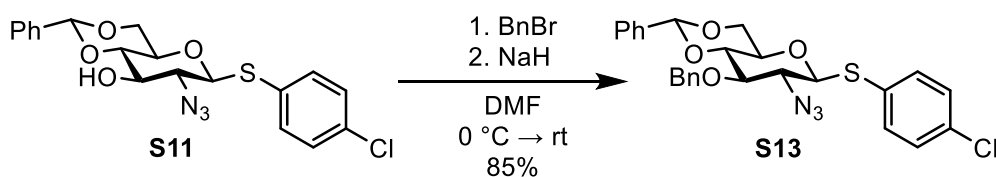

To a stirred solution of **S11**<sup>3</sup> (2.40 mmol, 1.01 g) in DMF (20 mL) was added 60% NaH (4.80 mmol, 192 mg) at 0 °C. Then, BnBr (3.60 mmol, 450  $\mu\text{L}$ ) was added dropwise, and the reaction was kept stirring overnight. The progress of the reaction was monitored by TLC analysis, and the reaction was quenched with saturated aqueous  $\text{NaHCO}_3$  solution. The solution was diluted with in EtOAc (100 mL) and washed with 1 M HCl aqueous solution (50 mL  $\times$  2), saturated aqueous  $\text{NaHCO}_3$  solution (50 mL  $\times$  2), and brine (50 mL). The organic layer was dried over anhydrous  $\text{Na}_2\text{SO}_4$ , filtered and concentrated under reduced pressure to give the crude product. The crude product was purified with silica gel chromatography (hexane/EtOAc 8:1) to afford **S13** (2.06 mmol, 1.05 g, 86%) as a white solid.

4-Chlorophenyl-2-azido-3-*O*-benzyl-4,6-*O*-benzylidene-2-deoxy-1-thio- $\beta$ -D-glucopyranoside (**S13**): TLC (eluent: hexane/EtOAc 8:1)  $R_f$  = 0.46;  $^1\text{H}$  NMR (600 MHz,  $\text{CDCl}_3$ )  $\delta$  7.51–7.46 (m, 4 H), 7.40–7.37 (m, 3 H), 7.36–7.29 (m, 7 H), 5.57 (s, 1 H), 4.91 (d,  $J$  = 11.0 Hz, 1 H), 4.78 (d,  $J$  = 11.0 Hz, 1 H), 4.44 (d,  $J$  = 10.1 Hz, 1 H), 4.38 (dd,  $J$  = 10.6, 5.0 Hz, 1 H), 3.77 (*pseudo*-t,  $J$  = 10.3 Hz, 1 H), 3.66 (*pseudo*-t,  $J$  = 9.1 Hz, 1 H), 3.63 (*pseudo*-t,  $J$  = 9.2 Hz, 1 H), 3.48–3.42 (m, 1 H), 3.33 (*pseudo*-t,  $J$  = 9.3 Hz, 1 H);  $^{13}\text{C}$  NMR (150 MHz,  $\text{CDCl}_3$ )  $\delta$  137.5, 137.0, 135.4, 135.3, 129.4, 129.2, 129.0, 128.5, 128.4, 128.1, 126.0, 101.3, 86.5, 81.3, 80.9, 76.9, 75.2, 70.6, 68.5, 64.7; HRMS (ESI)  $m/z$  calcd for  $\text{C}_{26}\text{H}_{24}\text{ClKN}_3\text{O}_6\text{S}$   $[\text{M}+\text{Na}]^+$ , 548.0808; found, 548.0817.



Preparation of 4-chlorophenyl-2-azido-3,4-di-*O*-benzyl-2-deoxy-1-thio-β-*D*-glucopyranoside (**17b**)

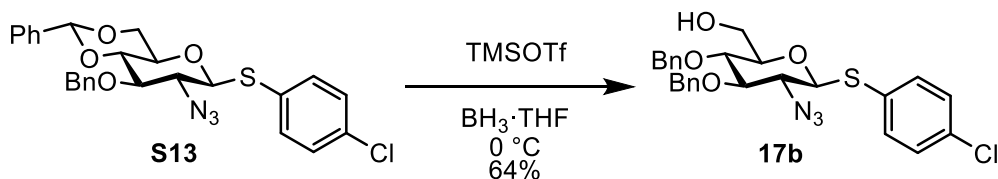

To a stirred solution of **S13** (2.31 mmol, 1.18 g), and  $\text{BH}_3 \cdot \text{THF}$  (12 mL), TMSOTf (1.2 mL) was added dropwise at 0 °C. Then, the mixture was stirred for 6 hours at room temperature. The reaction was quenched with saturated aqueous  $\text{NaHCO}_3$  solution, and the reaction mixture diluted with in EtOAc. The solution was washed with saturated aqueous  $\text{NaHCO}_3$  solution (3 times),  $\text{H}_2\text{O}$  (3 times) and brine respectively. The organic layer was dried over anhydrous  $\text{Na}_2\text{SO}_4$ , filtered, and concentrated under reduced pressure. The crude product was purified with silica gel chromatography (hexane/EtOAc 5:1) to obtain **1d** (1.47 mmol, 0.750 g, 64%) as a white solid.

4-Chlorophenyl-2-azido-3,4-di-*O*-benzyl-2-deoxy-1-thio-β-*D*-glucopyranoside (**17b**): TLC (eluent: hexane/EtOAc 3:1)  $R_f = 0.40$ ;  $^1\text{H}$  NMR (600 MHz,  $\text{CDCl}_3$ )  $\delta$  7.48–7.46 (m, 2 H), 7.36–7.27 (m, 12 H), 4.87 (d,  $J = 10.6$  Hz, 1 H), 4.86 (d,  $J = 10.6$  Hz, 1 H), 4.84–4.82 (m, 1 H), 4.64 (d,  $J = 11.1$  Hz, 1 H), 4.41 (d,  $J = 10.2$  Hz, 1 H), 3.87 (dd,  $J = 6.0, 2.7$  Hz, 1 H), 3.71–3.67 (m, 1 H), 3.55–3.50 (m, 2 H), 3.36 (dd,  $J = 4.8, 2.7$  Hz, 1 H), 3.30 (ddd,  $J = 10.2, 6.6, 2.7$  Hz, 1 H), 1.82 (*pseudo-t*,  $J = 6.9$  Hz, 1 H);  $^{13}\text{C}$  NMR (150 MHz,  $\text{CDCl}_3$ )  $\delta$  137.6, 137.5, 135.1, 134.9, 129.6, 129.4, 128.69, 128.65, 128.32, 128.21, 128.19, 128.12, 86.1, 84.9, 79.8, 76.0, 75.2, 65.3, 61.9; HRMS (ESI)  $m/z$  calcd for  $\text{C}_{26}\text{H}_{26}\text{ClNaN}_3\text{O}_4\text{S} [\text{M}+\text{Na}]^+$ , 534.1225; found, 534.1211.

### 3. General procedure for cyclic oligoglucosamine synthesis with phthalimide group

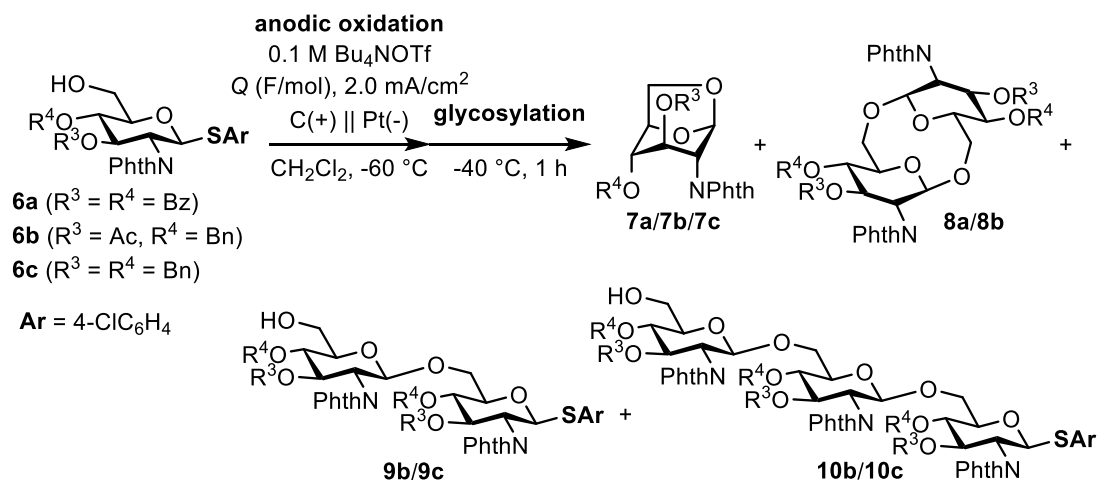

The electrochemical one-pot synthesis of cyclic oligosaccharides **8** and linear oligosaccharides **9** and **10** was conducted with an H-type divided cell (4G glass filter). The cell had a carbon felt anode (Nippon Carbon JF-20-p7) and platinum square plate (20 mm × 20 mm). Building block **6** (0.400 mmol), Bu<sub>4</sub>NOTf (1.00 mmol), and CH<sub>2</sub>Cl<sub>2</sub> (10 mL) were added to the anodic chamber. TfOH (0.400 mmol), Bu<sub>4</sub>NOTf (1.00 mmol), and CH<sub>2</sub>Cl<sub>2</sub> (10 mL) were added to the cathodic chamber. As the initiation phase of reaction, the constant current (8.0 mA (current density: 2.0 mA/cm<sup>2</sup>), (electrode distance: 4.5 cm)) was employed at -60 °C with magnetic stirring until electricity was consumed. After the electrolysis, the reaction temperature was raised from -60 °C to -40 °C as glycosylation phase. After glycosylation, Et<sub>3</sub>N (0.5 mL) was added to both of the chambers. The mixture was collected, and the solvent was removed under reduced pressure. The mixture was dissolved in EtOAc and washed with H<sub>2</sub>O to remove electrolyte. The solution was dried over anhydrous Na<sub>2</sub>SO<sub>4</sub>, filtered, and removed under reduced pressure. The crude product was purified with preparative GPC to afford 1,6-anhydrosugar **7**,<sup>4-6</sup> cyclic oligosaccharides **8**<sup>7</sup> and linear oligosaccharides **9** and **10**.

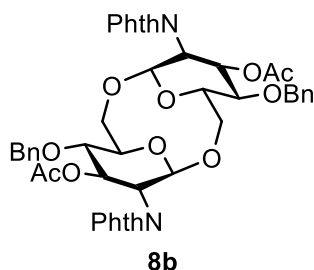

Building block **6b** (226 mg, 0.400 mmol) afforded **8b** as in 7% isolated yield (11 mg, 0.0130 mmol). Cyclobis[(1→6)-3-*O*-acetyl-4-*O*-benzyl-2-deoxy-2-phthalimido-β-D-glucopyranosyl] (**8b**): TLC (hexane/EtOAc 1:1) R<sub>f</sub> = 0.25; <sup>1</sup>H NMR (600 MHz, CDCl<sub>3</sub>) δ 7.87–7.86 (m, 2 H), 7.74–7.72 (m, 2 H), 7.39–7.38 (m, 1 H), 7.32–7.26 (m, 4 H), 5.70 (dd, *J* = 10.8, 8.7 Hz, 1 H), 4.93 (d, *J* = 1.8 Hz, 1 H),

4.78 (d,  $J = 11.7$  Hz, 1 H), 4.70 (d,  $J = 11.7$  Hz, 1 H), 4.48–4.45 (m, 2 H), 4.16–4.14 (m, 1 H), 3.88 (dd,  $J = 12.0, 2.7$  Hz, 1 H), 3.80 (d,  $J = 11.7$  Hz, 1 H), 1.90 (s, 3 H);  $^{13}\text{C}$  NMR (150 MHz,  $\text{CDCl}_3$ )  $\delta$  170.5, 167.7, 138.3, 134.4, 131.7, 129.4, 128.5, 127.9, 123.7, 100.1, 77.4, 75.0, 73.4, 71.8, 68.3, 57.7, 20.9; HRMS (ESI)  $m/z$  calcd for  $\text{C}_{46}\text{H}_{42}\text{KN}_2\text{O}_{14}$   $[\text{M}+\text{K}]^+$ , 885.2268; found, 885.2217.

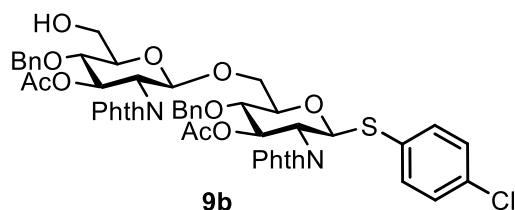

Building block **6b** (226 mg, 0.400 mmol) afforded **9b** as in 13% isolated yield (25 mg, 0.0253 mmol). 4-Chlorophenyl-(3-*O*-acetyl-4-*O*-benzyl-2-deoxy-2-phthalimido- $\beta$ -D-glucopyranosyl)-(1 $\rightarrow$ 6)-3-*O*-acetyl-4-*O*-benzyl-2-deoxy-2-phthalimido-1-thio- $\beta$ -D-glucopyranoside (**9b**): TLC (hexane/EtOAc 1:1)  $R_f = 0.33$ ;  $^1\text{H}$  NMR (600 MHz,  $\text{CDCl}_3$ )  $\delta$  7.81–7.70 (m, 7 H), 7.61–7.58 (m, 2 H), 7.34–7.30 (m, 3 H), 7.29–7.27 (m, 4 H), 7.25–7.20 (m, 4 H), 7.02–7.01 (m, 2 H), 5.79 (dd,  $J = 10.5, 9.0$  Hz, 1 H), 5.66 (dd,  $J = 10.2, 9.0$  Hz, 1 H), 5.56 (d,  $J = 10.5$  Hz, 1 H), 5.53 (d,  $J = 8.4$  Hz, 1 H), 4.69 (d,  $J = 11.4$  Hz, 1 H), 4.61 (d,  $J = 11.5$  Hz, 1 H), 4.36 (d,  $J = 11.5$  Hz, 1 H), 4.32 (d,  $J = 11.3$  Hz, 1 H), 4.28 (dd,  $J = 10.8, 8.4$  Hz, 1 H), 4.10 (*pseudo-t*,  $J = 10.5$  Hz, 1 H), 4.05 (dd,  $J = 11.1, 1.5$  Hz, 1 H), 3.95 (dd,  $J = 12.2, 2.6$  Hz, 1 H), 3.84–3.78 (m, 2 H), 3.76 (dd,  $J = 11.2, 4.9$  Hz, 1 H), 3.67–3.62 (m, 2 H), 3.52 (*pseudo-t*,  $J = 9.6$  Hz, 1 H), 2.12–2.05 (m, 1 H), 1.79 (s, 3 H), 1.66 (s, 3 H);  $^{13}\text{C}$  NMR (150 MHz,  $\text{CDCl}_3$ )  $\delta$  170.3, 170.1, 167.8, 167.3, 137.8, 137.5, 134.6, 134.5, 134.4, 134.3, 131.7, 131.2, 129.8, 129.2, 128.6, 128.5, 128.1, 127.9, 127.9, 127.5, 123.8, 123.7, 123.6, 123.6, 107.4, 98.3, 82.6, 78.5, 77.3, 77.1, 76.9, 76.6, 76.4, 75.4, 74.8, 74.7, 73.9, 73.2, 68.5, 61.8, 55.2, 53.9, 29.8, 20.7, 20.5; HRMS (ESI)  $m/z$  calcd for  $\text{C}_{52}\text{H}_{47}\text{ClKN}_2\text{O}_{14}\text{S}$   $[\text{M}+\text{K}]^+$ , 1029.2068; found, 1029.2040.

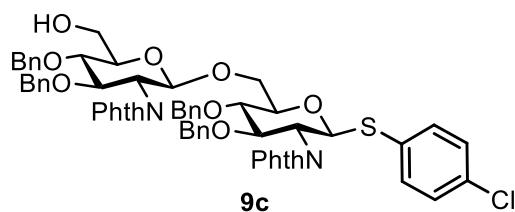

Building block **6c** (246 mg, 0.400 mmol) afforded **9c** in 4% isolated yield (8.0 mg, 6.84  $\mu\text{mol}$ ). 4-Chlorophenyl-(3,4-di-*O*-benzyl-2-deoxy-2-phthalimido- $\beta$ -D-glucopyranosyl)-(1 $\rightarrow$ 6)-3,4-di-*O*-benzyl-2-deoxy-2-phthalimido-1-thio- $\beta$ -D-glucopyranoside (**9c**): TLC (hexane/EtOAc 2:1)  $R_f = 0.23$ .  $^1\text{H}$  NMR (600 MHz,  $\text{CDCl}_3$ )  $\delta$  7.76–7.62 (m, 4H), 7.56–7.48 (m, 3H), 7.36–7.33 (m, 4H), 7.32–7.28

(m, 1H), 7.24–7.17 (m, 6H), 7.09–7.07 (m, 2H), 7.00–6.99 (m, 2 H), 6.89–6.84 (m, 5H), 6.84–6.78 (m, 5H), 5.31 (d,  $J = 10.5$  Hz, 1 H), 5.28 (d,  $J = 8.4$  Hz, 1 H), 4.89 (d,  $J = 10.8$  Hz, 1 H), 4.81 (d,  $J = 12.3$  Hz, 1 H), 4.74 (d,  $J = 11.1$  Hz, 1 H), 4.64 (d,  $J = 12.3$  Hz, 1 H), 4.52 (d,  $J = 10.8$  Hz, 1 H), 4.45 (d,  $J = 12.3$  Hz, 1 H), 4.37–4.33 (m, 2 H), 4.28 (d,  $J = 12.3$  Hz, 1 H), 4.21 (dd,  $J = 10.8, 8.7$  Hz, 2 H), 4.03 (*pseudo-t*,  $J = 10.5$  Hz, 1 H), 3.99 (dd,  $J = 10.8, 1.5$  Hz, 1 H), 3.91 (d,  $J = 10.2$  Hz, 1 H), 3.78–3.72 (m, 2 H), 3.67 (dd,  $J = 11.1, 5.1$  Hz, 1 H), 3.56–3.51 (m, 2 H), 3.44–3.40 (m, 1 H), 2.09–2.07 (m, 1 H);  $^{13}\text{C}$  NMR (150 MHz,  $\text{CDCl}_3$ )  $\delta$  167.23, 167.21, 138.0, 137.9, 137.7, 137.5, 134.3, 134.0, 133.98, 133.97, 133.95, 133.9, 131.5, 131.49, 130.2, 129.1, 128.7, 128.6, 128.5, 128.4, 128.2, 128.15, 128.1, 128.07, 128.04, 128.01, 127.96, 127.5, 123.5, 123.48, 123.45, 123.4, 98.4, 82.9, 80.1, 79.6, 79.2, 79.1, 78.6, 75.5, 75.2, 75.0, 68.2, 62.0, 55.8, 54.6, 29.8; HRMS (ESI)  $m/z$  calcd for  $\text{C}_{62}\text{H}_{55}\text{ClNaN}_2\text{O}_{12}\text{S}$   $[\text{M}+\text{Na}]^+$ , 1109.3056; found, 1109.3041.

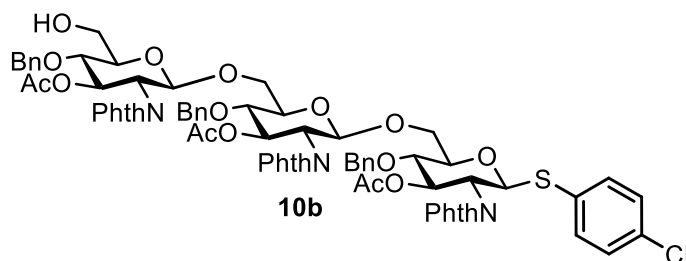

Building block **6b** (226 mg, 0.400 mmol) afforded **10b** in 6% isolated yield (11 mg, 7.80  $\mu\text{mol}$ ). 4-Chlorophenyl-(3-*O*-acetyl-4-*O*-benzyl-2-deoxy-2-phthalimido- $\beta$ -D-glucopyranosyl)-(1 $\rightarrow$ 6)-(3-*O*-acetyl-4-*O*-benzyl-2-deoxy-2-phthalimido- $\beta$ -D-glucopyranosyl)-(1 $\rightarrow$ 6)-(3-*O*-acetyl-4-*O*-benzyl-2-deoxy-2-phthalimido-1-thio- $\beta$ -D-glucopyranoside (**10b**): TLC (hexane/EtOAc 1:1)  $R_f = 0.23$ ;  $^1\text{H}$  NMR (600 MHz,  $\text{CDCl}_3$ )  $\delta$  7.85–7.80 (m, 2 H), 7.76–7.68 (m, 6 H), 7.62–7.57 (m, 4 H), 7.31–7.26 (m, 7 H), 7.24–7.22 (m, 2 H), 7.21–7.18 (m, 6 H), 7.02–6.96 (m, 4 H), 5.78 (dd,  $J = 10.8, 9.0$  Hz, 1 H), 5.66–5.62 (m, 2 H), 5.55 (d,  $J = 8.4$  Hz, 1 H), 5.54 (d,  $J = 10.5$  Hz, 1 H), 5.45 (d,  $J = 8.4$  Hz, 1 H), 4.67 (d,  $J = 11.7$  Hz, 1 H), 4.61 (d,  $J = 11.7$  Hz, 1 H), 4.36–4.30 (m, 3 H), 4.28 (d,  $J = 11.2$  Hz, 1 H), 4.24 (d,  $J = 11.3$  Hz, 1 H), 4.21 (dd,  $J = 10.7, 8.5$  Hz, 1 H), 4.13–4.09 (m, 1 H), 4.06–4.01 (m, 2 H), 3.96 (ddd,  $J = 12.1, 4.9, 2.2$  Hz, 1 H), 3.87 (dd,  $J = 11.4, 4.2$  Hz, 1 H), 3.80–3.75 (m, 2 H), 3.70 (dd,  $J = 11.4, 4.8$  Hz, 1 H), 3.67–3.64 (m, 2 H), 3.63–3.57 (m, 2 H), 3.45 (*pseudo-t*,  $J = 9.6$  Hz, 1 H), 2.32 (dd,  $J = 8.5, 5.2$  Hz, 1 H), 1.76 (s, 3 H), 1.70 (s, 3 H), 1.62 (s, 3 H);  $^{13}\text{C}$  NMR (150 MHz,  $\text{CDCl}_3$ )  $\delta$  170.3, 170.1, 167.9, 167.3, 137.9, 137.6, 134.9, 134.7, 134.5, 134.3, 134.2, 134.1, 131.8, 131.2, 129.3, 128.6, 128.5, 128.4, 128.4, 127.9, 127.8, 127.6, 127.5, 123.8, 123.7, 123.6, 98.2, 82.0, 78.3, 76.7, 76.5, 76.4, 75.5, 74.8, 74.7, 74.66, 74.65, 73.8, 73.3, 73.25, 73.2, 68.2, 68.16, 61.6, 60.5, 55.3, 55.0, 31.7, 22.7, 21.2, 20.7, 20.6, 20.5, 14.3, 14.2; HRMS (ESI)  $m/z$  calculated for  $\text{C}_{75}\text{H}_{68}\text{ClNaN}_3\text{O}_{21}\text{S}$   $[\text{M}+\text{Na}]^+$ , 1436.3647; found, 1436.3628.

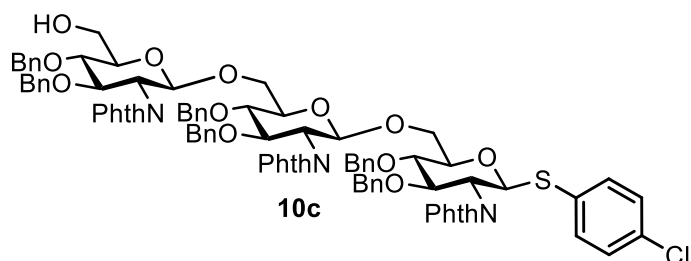

Building block **6c** (246 mg, 0.40 mmol) afforded **10c** in 2% isolated yield (5.0 mg, 3.21  $\mu$ mol).

4-Chlorophenyl-(3,4-di-*O*-benzyl-2-deoxy-2-phthalimido- $\beta$ -D-glucopyranosyl)-(1 $\rightarrow$ 6)-(3,4-di-*O*-benzyl-2-deoxy-2-phthalimido- $\beta$ -D-glucopyranosyl)-(1 $\rightarrow$ 6)-3,4-di-*O*-benzyl-2-deoxy-2-phthalimido-1-thio- $\beta$ -D-glucopyranoside (**10c**): TLC (hexane/EtOAc 1:1)  $R_f$  = 0.50;  $^1\text{H}$  NMR (600 MHz,  $\text{CDCl}_3$ )  $\delta$  7.78–7.74 (m, 1 H), 7.72–7.62 (m, 5 H), 7.56–7.54 (m, 1 H), 7.53–7.48 (m, 2 H), 7.34–7.32 (m, 4 H), 7.30–7.26 (m, 4 H), 7.23–7.20 (m, 6 H), 7.20–7.17 (m, 4 H), 7.10–7.08 (m, 2 H), 7.07–7.04 (m, 2 H), 6.97–6.95 (m, 2 H), 6.87–6.85 (m, 2 H), 6.93–6.90 (m, 2 H), 6.97–6.77 (m, 9 H), 5.32 (d,  $J$  = 8.4 Hz, 1 H), 5.25 (d,  $J$  = 10.4 Hz, 1 H), 5.16 (d,  $J$  = 8.2 Hz, 1 H), 4.85 (d,  $J$  = 10.9 Hz, 1 H), 4.77 (d,  $J$  = 12.1 Hz, 1 H), 4.72 (d,  $J$  = 11.0 Hz, 1 H), 4.66 (d,  $J$  = 12.2 Hz, 1 H), 4.59 (d,  $J$  = 12.1 Hz, 1 H), 4.47 (d,  $J$  = 10.6 Hz, 1 H), 4.44–4.38 (m, 2 H), 4.37 (d,  $J$  = 12.0 Hz, 1 H), 4.35 (dd,  $J$  = 10.7, 8.6 Hz, 1 H), 4.33–4.30 (m, 2 H), 4.28–4.24 (m, 3 H), 4.21–4.12 (m, 4 H), 4.06 (dd,  $J$  = 10.9, 1.5 Hz, 1 H), 3.98–3.91 (m, 3 H), 3.78 (dd,  $J$  = 11.3, 4.5 Hz, 1 H), 3.72 (*pseudo*-t,  $J$  = 9.1 Hz, 1 H), 3.60–3.55 (m, 2 H), 3.50 (dd,  $J$  = 10.0, 3.8 Hz, 1 H), 3.42 (dd,  $J$  = 10.3, 3.1 Hz, 1 H), 3.37 (*pseudo*-t,  $J$  = 9.6 Hz, 1 H), 2.45–2.37 (m, 1 H);  $^{13}\text{C}$  NMR (150 MHz,  $\text{CDCl}_3$ )  $\delta$  168.2, 168.0, 137.6, 137.4, 134.8, 134.6, 134.3, 134.2, 133.9, 131.8, 131.4, 129.2, 129.14, 129.1, 128.8, 128.7, 128.6, 128.59, 128.57, 128.5, 128.4, 128.3, 128.25, 128.2, 128.15, 128.13, 128.10, 128.09, 128.05, 128.04, 128.02, 127.99, 127.93, 127.91, 127.9, 127.6, 127.4, 127.36, 123.9, 123.6, 123.4, 102.2, 101.1, 85.4, 79.0, 76.5, 75.1, 74.8, 72.5, 71.8, 70.4, 70.3, 68.8, 68.2, 64.7, 57.8, 51.9, 29.8, 26.5; HRMS (ESI)  $m/z$  calcd for  $\text{C}_{90}\text{H}_{80}\text{ClKN}_3\text{O}_{18}\text{S}$   $[\text{M}+\text{K}]^+$ , 1596.4478; found, 1596.4441.

#### 4. General procedure for cyclic oligoglucosamine with a 2,3-oxazolidinone group

Synthesis of cyclobis[(1→6)-2-acetamido-4-*O*-benzyl-2,3-*N,O*-carbonyl-2-deoxy-β-*D*-glucopyranosyl] (**16**)

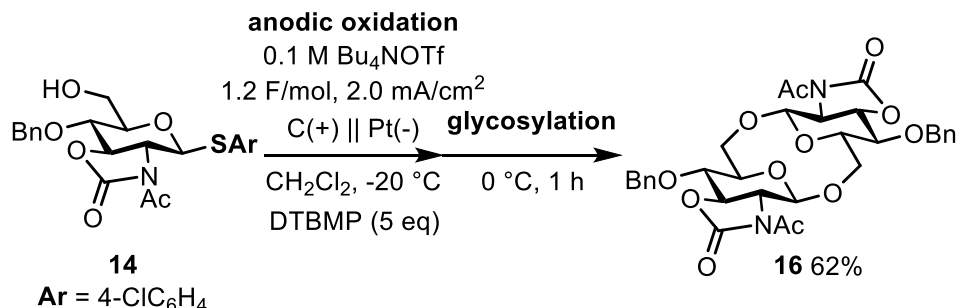

The electrochemical one-pot synthesis of cyclic disaccharide **16** was conducted with an H-type divided cell (4G glass filter). The cell had a carbon felt anode (Nippon Carbon JF-20-p7) and platinum square plate (20 mm × 20 mm). Building block **14** (0.400 mmol, 186 mg), Bu<sub>4</sub>NOTf (1.00 mmol, 392 mg), 2,6-di-*tert*-butyl-4-methylpyridine (DTBMP) (2.0 mmol, 411 mg), and CH<sub>2</sub>Cl<sub>2</sub> (10 mL) were added to the anodic chamber. TfOH (0.400 mmol, 35.2 μL), Bu<sub>4</sub>NOTf (1.00 mmol, 392 mg), and CH<sub>2</sub>Cl<sub>2</sub> (10 mL) were added to the cathodic chamber. As the initiation phase of reaction, the constant current (8.0 mA (current density: 2.0 mA/cm<sup>2</sup>), 18~22 V (electrode distance: 4.5 cm)) was employed at -20 °C with magnetic stirring until 1.2 F/mol of electricity was consumed. After the electrolysis, the reaction temperature was raised from -20 °C to 0 °C as glycosylation phase. After glycosylation, Et<sub>3</sub>N (0.5 mL) was added to both of the chambers. The solution was collected, and the solvent was removed under reduced pressure. The mixture was dissolved in EtOAc and washed with H<sub>2</sub>O to remove electrolyte. It was further washed with 1 N HCl (aq) to remove excessive DTBMP. The solution was dried over anhydrous Na<sub>2</sub>SO<sub>4</sub>, and the solvent was removed under reduced pressure. The crude product was purified with preparative GPC to afford cyclic oligosaccharide **16** (0.125 mmol, 79.7 mg, 62%) as a white solid.

Cyclobis[(1→6)-2-acetamido-4-*O*-benzyl-2,3-*N,O*-carbonyl-2-deoxy-β-*D*-glucopyranosyl] (**16**): TLC (eluent: hexane/EtOAc 2:1) R<sub>f</sub> = 0.31; <sup>1</sup>H NMR (CDCl<sub>3</sub>, 600 MHz) δ 7.38–7.35 (m, 4 H), 7.33–7.30 (m, 1 H), 5.24 (d, *J* = 5.7 Hz, 1 H), 4.89 (d, *J* = 11.4 Hz, 1 H), 4.62 (d, *J* = 11.2 Hz, 1 H), 4.31 (dd, *J* = 12.5, 6.6 Hz, 1 H), 4.18 (dd, *J* = 9.7, 4.3 Hz, 1 H), 4.16–4.13 (m, 1 H), 4.01 (dd, *J* = 10.9, 2.5 Hz, 1 H), 3.94 (dd, *J* = 12.5, 5.8 Hz, 1 H), 3.59 (dd, *J* = 11.0, 1.5 Hz, 1H), 2.53 (s, 3 H); <sup>13</sup>C NMR (CDCl<sub>3</sub>, 150 MHz) δ 170.6, 153.7, 137.3, 128.5, 128.0, 127.9, 97.0, 81.7, 73.1, 63.8, 62.0, 24.5; HRMS (ESI) *m/z* calcd for C<sub>32</sub>H<sub>34</sub>KN<sub>2</sub>O<sub>12</sub>; [M+K]<sup>+</sup>, 677.1744, found 677.1735.

## 5. General procedure for cyclic oligoglucosamines with an azido group

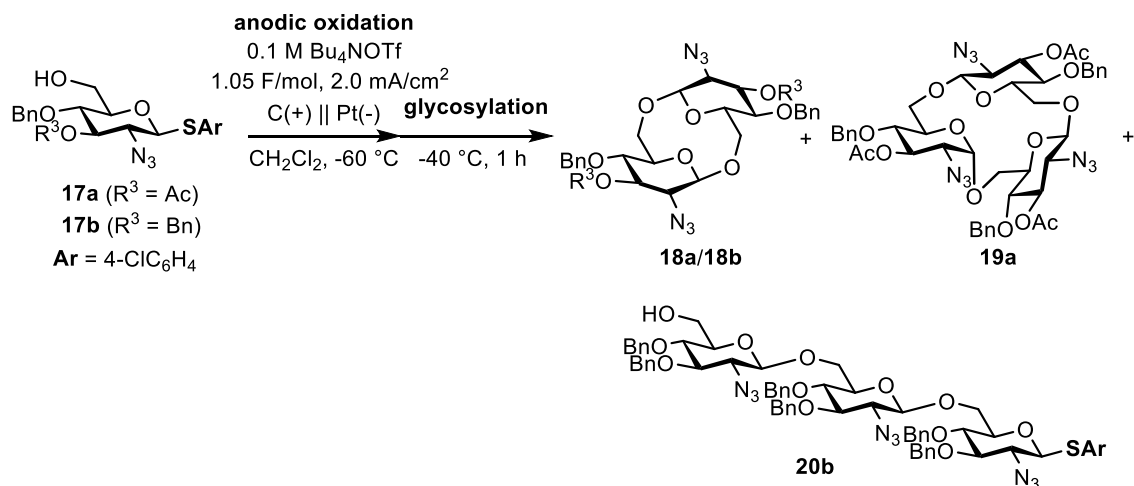

The electrochemical polymerization synthesis of cyclic oligosaccharides **18** and **19** and linear oligosaccharide **20** was carried out by an H-type divided cell (4G glass filter). The cell had a carbon felt anode (Nippon Carbon JF-20-P7) and platinum square plate (20 mm × 20 mm). Building block **17** (0.40 mmol), Bu<sub>4</sub>NOTf (1.00 mmol), and CH<sub>2</sub>Cl<sub>2</sub> (10 mL) were added to the anodic chamber. TfOH (0.4 mmol), Bu<sub>4</sub>NOTf (1.00 mmol), and CH<sub>2</sub>Cl<sub>2</sub> (10 mL) were added to the cathodic chamber. The constant current (8 mA (current density: 2.0 mA/cm<sup>2</sup>), (electrode distance: 4.5 cm)) was employed at -60 °C with magnetic stirring until the electricity was consumed. After the electrolysis, the reaction was kept stirring at -40 °C for 1 h. After that, Et<sub>3</sub>N (0.3 mL) was added to both chambers. The solution in both chambers was collected in eggplant flask, and the solvent was removed under reduced pressure. The mixture was dissolved in EtOAc and washed with H<sub>2</sub>O to remove electrolyte. The solution was dried over anhydrous Na<sub>2</sub>SO<sub>4</sub>, filtered, and the solution was removed under reduced pressure. The crude product was purified with preparative GPC to afford cyclic oligosaccharides **18** and **19** and linear trisaccharide **20b**.

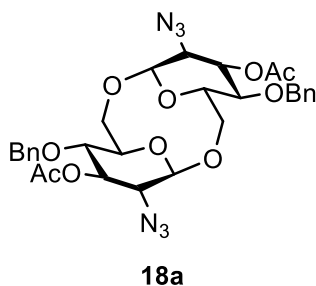

Building block **17a** (185 mg, 0.40 mmol) afforded **18a** in 49% isolated yield (63 mg, 0.987mmol).

Cyclobis[(1→6)-3-*O*-acetyl-2-azido-4-*O*-benzyl-2-deoxy-2-β-D-glucopyranosyl] (**18a**): TLC (hexane/EtOAc 3:1) R<sub>f</sub> = 0.28; <sup>1</sup>H NMR (600 MHz, CDCl<sub>3</sub>) δ 7.35–7.29 (m, 5 H), 5.05 (dd, *J* = 9.0,

3.6 Hz, 1 H), 4.72 (d,  $J = 1.8$  Hz, 1 H), 4.69 (d,  $J = 11.6$  Hz, 1 H), 4.61 (d,  $J = 11.5$  Hz, 1 H), 4.44 (dd,  $J = 10.2, 9.6$  Hz, 1 H), 4.11 (dd,  $J = 12.3, 1.2$  Hz, 1 H), 3.82–3.79 (m, 1 H), 3.71 (dd,  $J = 12.6, 1.2$  Hz, 1 H), 3.65 (dd,  $J = 3.6, 1.8$  Hz, 1 H), 1.96 (s, 3 H);  $^{13}\text{C}$  NMR (150 MHz,  $\text{CDCl}_3$ )  $\delta$  170.2, 138.1, 128.6, 128.2, 128.0, 100.3, 75.7, 74.7, 74.5, 73.7, 70.9, 65.3, 21.0; HRMS (ESI)  $m/z$  calcd for  $\text{C}_{30}\text{H}_{34}\text{KN}_6\text{O}_{10}$   $[\text{M}+\text{K}]^+$ , 677.1968; found, 677.1933.

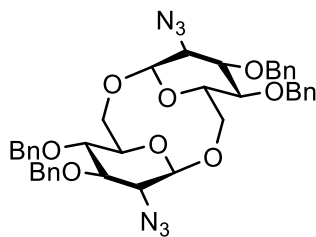

**18b**

Building block **17b** (205 mg, 0.40 mmol) afforded **18b** in 14% isolated yield (21 mg, 0.0281 mmol).  
 Cyclobis[(1→6)-2-azido-3,4-di-*O*-benzyl-2-deoxy-2-β-D-glucopyranosyl] (**18b**): TLC (hexane/EtOAc 3:1)  $R_f = 0.63$ ;  $^1\text{H}$  NMR (600 MHz,  $\text{CDCl}_3$ )  $\delta$  7.36–7.28 (m, 10 H), 4.86 (d,  $J = 11.3$  Hz, 1 H), 4.84 (d,  $J = 11.0$  Hz, 1 H), 4.78 (d,  $J = 11.1$  Hz, 1 H), 4.67 (d,  $J = 11.4$  Hz, 1 H), 4.58–4.57 (m, 1 H), 4.20 (*pseudo-t*,  $J = 9.6$  Hz, 1 H), 3.92 (dd,  $J = 12.0, 2.4$  Hz, 1 H), 3.76 (dd,  $J = 9.6, 1.8$  Hz, 1 H), 3.67–3.62 (m, 2 H), 3.50 (dd,  $J = 6.6, 1.2$  Hz, 1 H), 1.43 (dd,  $J = 15.0, 7.5$  Hz, 2 H);  $^{13}\text{C}$  NMR (150 MHz,  $\text{CDCl}_3$ )  $\delta$  138.2, 137.8, 128.54, 128.49, 128.13, 128.09, 127.98, 127.97, 100.9, 81.7, 77.0, 75.0, 74.5, 74.2, 69.2, 67.7, 58.9, 24.0, 19.7, 13.7; HRMS (ESI)  $m/z$  calcd for  $\text{C}_{40}\text{H}_{42}\text{KN}_6\text{O}_8$   $[\text{M}+\text{K}]^+$ , 773.2696; found, 773.2650.

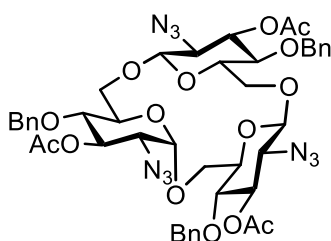

**19a**

Building block **17a** (185 mg, 0.40 mmol) afforded **19a** in 16% isolated yield (19 mg, 0.0208 mmol).  
 Cyclotris[(1→6)-3-*O*-acetyl-2-azido-4-*O*-benzyl-2-deoxy-2-α,β,β-D-glucopyranosyl] (**19a**): TLC (hexane/EtOAc 2:1)  $R_f = 0.32$ ;  $^1\text{H}$  NMR (600 MHz,  $\text{CDCl}_3$ )  $\delta$  7.37–7.28 (m, 10 H), 7.28–7.25 (m, 2 H), 7.22–7.21 (m, 3 H), 5.61 (dd,  $J = 10.8, 9.0$  Hz, 1 H), 5.10 (dd,  $J = 10.8, 9.6$  Hz, 1 H), 4.95 (*pseudo-t*,  $J = 10.2$  Hz, 1 H), 4.80 (d,  $J = 3.6$  Hz, 1 H), 4.72 (d,  $J = 11.4$  Hz, 1 H), 4.63 (d,  $J = 11.4$  Hz, 1 H), 4.61 (d,  $J = 11.4$  Hz, 2 H), 4.53 (d,  $J = 12.0$  Hz, 1 H), 4.52 (d,  $J = 7.8$  Hz, 1 H), 4.51 (d,  $J = 11.4$  Hz, 1 H), 4.33 (dd,  $J = 12.6, 1.8$  Hz, 1 H), 4.22 (d,  $J = 7.8$  Hz, 1 H), 4.03 (dd,  $J = 12.6, 8.4$  Hz, 1 H), 3.91–



3.89 (m, 1 H), 3.81–3.77 (m, 3 H), 3.75 (*pseudo*-t,  $J = 9.6$  Hz, 1 H), 3.70 (ddd,  $J = 9.0, 6.6, 1.2$  Hz, 1 H), 3.45 (dd,  $J = 10.2, 7.8$  Hz, 1 H), 3.44 (dd,  $J = 10.3, 6.0$  Hz, 1H), 3.29 (*pseudo*-t,  $J = 9.6$  Hz, 1H), 3.18–3.15 (m, 1 H), 3.15 (*pseudo*-t,  $J = 9.6$  Hz, 1 H), 3.06 (dd,  $J = 10.8, 3.6$  Hz, 1 H), 2.08 (s, 3 H), 2.06 (s, 3 H), 1.96 (s, 3 H);  $^{13}\text{C}$  NMR (150 MHz,  $\text{CDCl}_3$ )  $\delta$  170.0, 169.7, 137.9, 137.2, 137.15, 128.8, 128.7, 128.5, 128.48, 128.3, 128.0, 127.9, 127.74, 127.7, 105.7, 101.3, 97.9, 77.7, 76.4, 75.3, 75.28, 74.9, 74.3, 74.2, 74.0, 73.9, 73.5, 71.8, 71.6, 69.6, 68.8, 64.9, 63.7, 61.2, 21.1, 21.0, 20.96, 14.3; HRMS (ESI)  $m/z$  calcd for  $\text{C}_{45}\text{H}_{51}\text{KN}_9\text{O}_{15}$   $[\text{M}+\text{K}]^+$ , 996.3136; found, 996.3195.

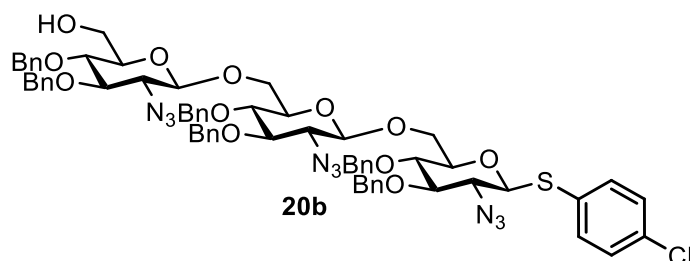

Building block **17b** (205 mg, 0.40 mmol) afforded **20b** in 13% isolated yield (21 mg, 0.0171 mmol). 4-Chlorophenyl-(2-azido-2-deoxy-3,4-di-*O*-benzyl- $\beta$ -D-glucopyranosyl)-(1 $\rightarrow$ 6)-(2-azido-2-deoxy-3,4-di-*O*-benzyl- $\beta$ -D-glucopyranosyl)-(1 $\rightarrow$ 6)-2-azido-2-deoxy-3,4-di-*O*-benzyl-1-thio- $\beta$ -D-glucopyranoside (**20b**): TLC (hexane/EtOAc 2:1)  $R_f = 0.40$ ;  $^1\text{H}$  NMR (600 MHz,  $\text{CDCl}_3$ )  $\delta$  7.55–7.53 (m, 2 H), 7.37–7.34 (m, 5 H), 7.33–7.30 (m, 15 H), 7.29–7.26 (m, 12 H), 4.64–4.61 (m, 3 H), 4.42 (d,  $J = 10.2$  Hz, 1 H), 4.29–4.26 (m, 2 H), 4.16 (dd,  $J = 11.4, 1.8$  Hz, 1 H), 4.04 (dd,  $J = 11.4, 1.5$  Hz, 1 H), 3.79 (dd,  $J = 11.4, 5.1$  Hz, 1 H), 3.66–3.62 (m, 2 H), 3.54–3.45 (m, 4 H), 3.43–3.40 (m, 1 H), 3.38–3.36 (m, 1 H), 3.31 (dd,  $J = 10.2, 9.3$  Hz, 1 H), 3.21 (*pseudo*-t,  $J = 8.7$  Hz, 4 H), 1.90 (dd,  $J = 7.7, 6.0$  Hz, 1H);  $^{13}\text{C}$  NMR (150 MHz,  $\text{CDCl}_3$ )  $\delta$  137.9, 137.82, 137.79, 137.6, 135.0, 129.3, 128.82, 128.77, 128.66, 128.62, 128.61, 128.54, 128.49, 128.3, 128.21, 128.19, 128.18, 128.15, 128.13, 128.09, 128.08, 128.05, 128.02, 127.99, 127.98, 129.92, 127.9, 127.7, 102.6, 102.4, 86.0, 85.0, 83.2, 82.9, 78.9, 77.8, 77.6, 75.9, 75.8, 75.5, 75.4, 75.13, 75.10, 75.09, 74.8, 66.5, 66.4, 65.1, 61.7, 58.9, 24.0, 19.8, 13.7; HRMS (ESI)  $m/z$  calcd for  $\text{C}_{66}\text{H}_{68}\text{ClNaN}_9\text{O}_{12}\text{S}$   $[\text{M}+\text{Na}]^+$ , 1268.4289; found, 1268.4249.

## 6. Molecular orbital calculations for the anhydrosugar **15**

The molecular orbital calculations were carried out with 1,6-anhydro-2-acetamido-4-*O*-benzyl-2,3-*N,O*-carbonyl-2-deoxy- $\beta$ -D-glucopyranoside (**15**) at the B3LYP/6-31G(d) level using the Gaussian 16, Revision C.02.<sup>8</sup> Geometries were fully optimized. All the optimized structures were local minima according to the vibration analysis. Cartesian coordinates of computationally characterized species are as follows:

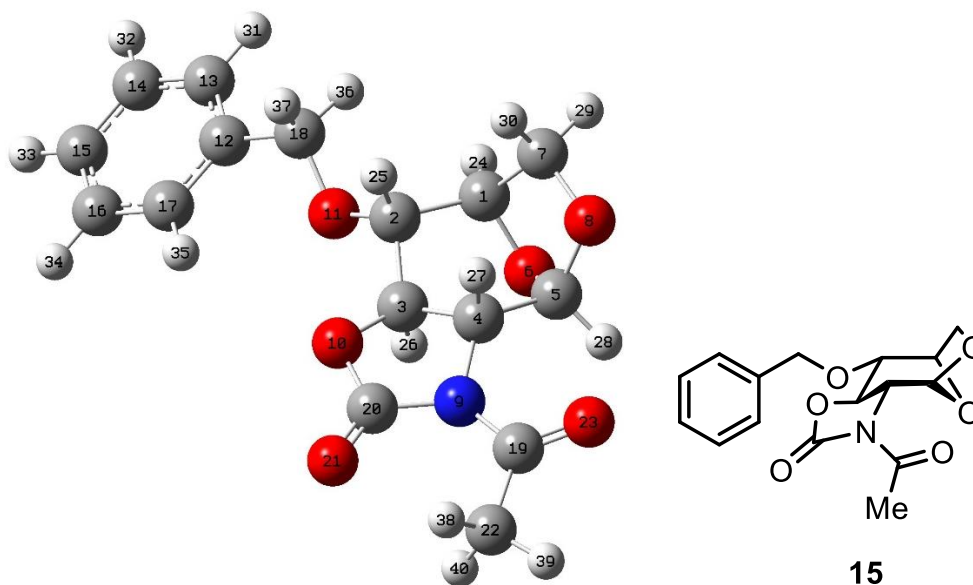

(white H, black C, blue N, red O)

| center | atomic | atomic | coordinates (Å) |          |          |
|--------|--------|--------|-----------------|----------|----------|
| number | number | type   | X               | Y        | Z        |
| 1      | 6      | 0      | -0.16492        | 2.131337 | 0.2187   |
| 2      | 6      | 0      | 0.274667        | 0.754509 | -0.42251 |
| 3      | 6      | 0      | -0.7847         | -0.2157  | 0.051899 |
| 4      | 6      | 0      | -2.17365        | 0.346913 | -0.18699 |
| 5      | 6      | 0      | -2.30435        | 1.679611 | 0.613134 |
| 6      | 8      | 0      | -1.08166        | 1.900996 | 1.306095 |
| 7      | 6      | 0      | -1.02417        | 3.036293 | -0.6985  |
| 8      | 8      | 0      | -2.37958        | 2.739594 | -0.32505 |
| 9      | 7      | 0      | -2.93857        | -0.87696 | 0.077304 |
| 10     | 8      | 0      | -0.86217        | -1.52716 | -0.54015 |
| 11     | 8      | 0      | 1.526591        | 0.308336 | 0.050603 |
| 12     | 6      | 0      | 3.895483        | 0.079124 | -0.22469 |
| 13     | 6      | 0      | 5.10813         | 0.755448 | -0.05983 |
| 14     | 6      | 0      | 6.269702        | 0.058067 | 0.277473 |

|    |   |   |          |          |          |
|----|---|---|----------|----------|----------|
| 15 | 6 | 0 | 6.224147 | -1.32373 | 0.464531 |
| 16 | 6 | 0 | 5.013341 | -2.00364 | 0.310461 |
| 17 | 6 | 0 | 3.855851 | -1.30808 | -0.03621 |
| 18 | 6 | 0 | 2.654427 | 0.828476 | -0.64793 |
| 19 | 6 | 0 | -4.33893 | -0.85859 | 0.207606 |
| 20 | 6 | 0 | -2.13822 | -1.97578 | -0.3258  |
| 21 | 8 | 0 | -2.47812 | -3.11809 | -0.48533 |
| 22 | 6 | 0 | -5.05385 | -2.18061 | 0.34572  |
| 23 | 8 | 0 | -4.90638 | 0.219384 | 0.233441 |
| 24 | 1 | 0 | 0.711775 | 2.634626 | 0.628949 |
| 25 | 1 | 0 | 0.285138 | 0.831605 | -1.52156 |
| 26 | 1 | 0 | -0.63025 | -0.35481 | 1.125877 |
| 27 | 1 | 0 | -2.31666 | 0.608144 | -1.2439  |
| 28 | 1 | 0 | -3.14116 | 1.728496 | 1.304974 |
| 29 | 1 | 0 | -0.83681 | 4.09738  | -0.5056  |
| 30 | 1 | 0 | -0.86848 | 2.837402 | -1.76574 |
| 31 | 1 | 0 | 5.146116 | 1.834702 | -0.19313 |
| 32 | 1 | 0 | 7.205483 | 0.596154 | 0.403168 |
| 33 | 1 | 0 | 7.125442 | -1.86806 | 0.733453 |
| 34 | 1 | 0 | 4.970403 | -3.07924 | 0.460004 |
| 35 | 1 | 0 | 2.911867 | -1.83238 | -0.14819 |
| 36 | 1 | 0 | 2.778026 | 1.905583 | -0.45278 |
| 37 | 1 | 0 | 2.487933 | 0.714053 | -1.73309 |
| 38 | 1 | 0 | -4.98025 | -2.75917 | -0.57938 |
| 39 | 1 | 0 | -6.09876 | -1.96667 | 0.57474  |
| 40 | 1 | 0 | -4.60718 | -2.79555 | 1.131953 |

---

## 7. References

1. Sugiyama, S.; Diakur, J. M. *Org. Lett.* **2000**, *2*, 2713.
2. Yano, K.; Itoh, T.; Nokami, T. *Carbohydr. Res.* **2020**, *492*, 109018.
3. Rahman, A. M.; Takahashi, S.; Sasaki, N.; Itoh, T.; Ohnuma, T.; Nokami, T. *Electrochemistry* **2023**, *91*, 112013.
4. Chun, Y.; Yan, S.; Li, X.; Ding, N.; Zhang, W.; Wang, P.; Li, M.; Li, Y. *Tetrahedron Lett.* **2011**, *52*, 6196.
5. Nokami, T.; Hayashi, R.; Saigusa, Y.; Shimizu, A.; Liu, C.-Y.; Mong, T. K.; Yoshida, J. *Org. Lett.* **2013**, *15*, 4520.
6. Garcia, J.; Vilarrasa, J.; Bordas, X.; Banaszek, A. *Tetrahedron Lett.* **1986**, *27*, 639.
7. Gening, M. L.; Titov, D. V.; Grachev, A. A.; Gerbst, A. G.; Yudina, O. N.; Shashkov, A. S.; Chizhov, A. O. Tsvetkov, Y. E.; Nifantiev, N. E. *Eur. J. Org. Chem.* **2010**, *13*, 2465.
8. Gaussian 16, Revision C.02, Frisch, M. J.; Trucks, G. W.; Schlegel, H. B.; Scuseria, G. E.; Robb, M. A.; Cheeseman, J. R.; Scalmani, G.; Barone, V.; Petersson, G. A.; Nakatsuji, H.; Li, X.; Caricato, M.; Marenich, A. V.; Bloino, J.; Janesko, B. G.; Gomperts, R.; Mennucci, B.; Hratchian, H. P.; Ortiz, J. V.; Izmaylov, A. F.; Sonnenberg, J. L.; Williams-Young, D.; Ding, F.; Lipparini, F.; Egidi, F.; Goings, J.; Peng, B.; Petrone, A.; Henderson, T.; Ranasinghe, D.; Zakrzewski, V. G.; Gao, J.; Rega, N.; Zheng, G.; Liang, W.; Hada, M.; Ehara, M.; Toyota, K.; Fukuda, R.; Hasegawa, J.; Ishida, M.; Nakajima, T.; Honda, Y.; Kitao, O.; Nakai, H.; Vreven, T.; Throssell, K.; Montgomery, Jr., J. A.; Peralta, J. E.; Ogliaro, F.; Bearpark, M. J.; Heyd, J. J.; Brothers, E. N.; Kudin, K. N.; Staroverov, V. N.; Keith, T. A.; Kobayashi, R.; Normand, J.; Raghavachari, K.; Rendell, A. P.; Burant, J. C.; Iyengar, S. S.; Tomasi, J.; Cossi, M.; Millam, J. M.; Klene, M.; Adamo, C.; Cammi, R.; Ochterski, J. W.; Martin, R. L.; Morokuma, K.; Farkas, O.; Foresman, J. B. and Fox, D. J., Gaussian, Inc., Wallingford CT, **2016**.

## 8. $^1\text{H}$ and $^{13}\text{C}$ NMR spectra of monosaccharides and oligosaccharides

### $^1\text{H}$ NMR

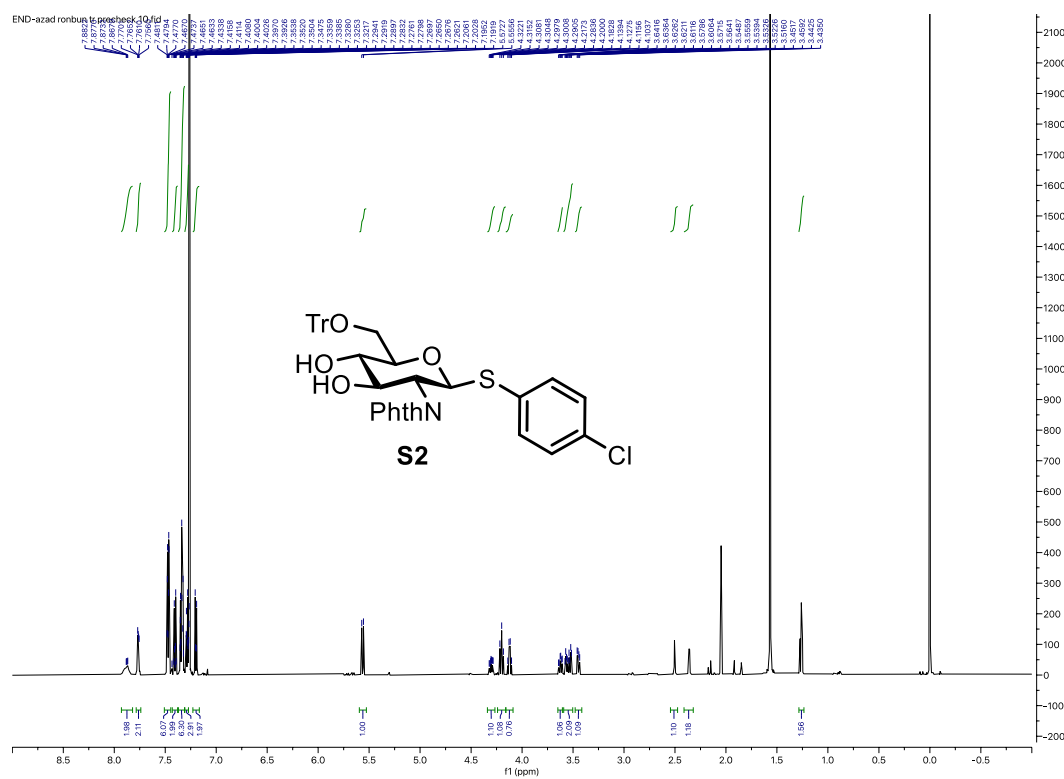

[illegible]



# <sup>1</sup>H NMR

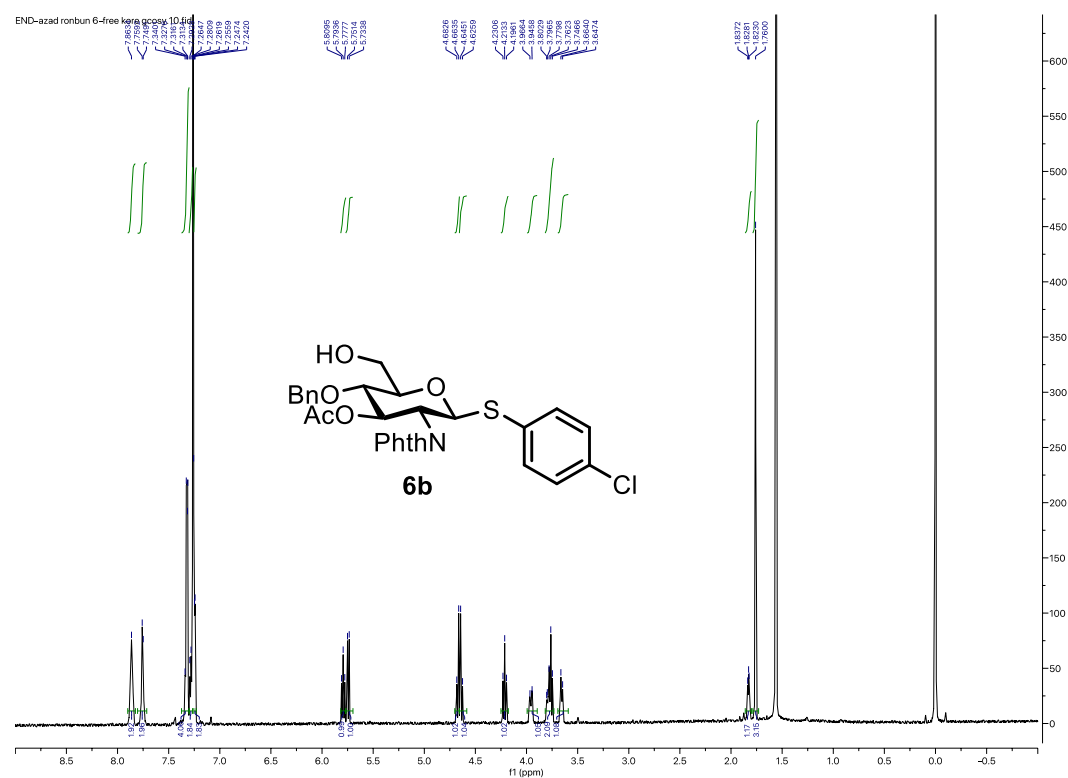



Chemical structure of **S6** is shown above the spectrum. The structure is a 1,2:3,5-di-O-isopropylidene-4-O-(4-chlorophenylthio)-D-glucopyranose derivative.

<sup>1</sup>H NMR spectrum (CDCl<sub>3</sub>) of **S6** is shown below the structure. The x-axis represents the chemical shift in ppm (δ), ranging from 0 to 8.5. The y-axis represents the intensity of the signal.

Key peaks and integrations are labeled:

- Aromatic protons (Ph): 7.26 (m, 1H), 7.24 (m, 1H), 7.22 (m, 1H), 7.20 (m, 1H), 7.18 (m, 1H), 7.16 (m, 1H), 7.14 (m, 1H), 7.12 (m, 1H), 7.10 (m, 1H), 7.08 (m, 1H), 7.06 (m, 1H), 7.04 (m, 1H), 7.02 (m, 1H), 7.00 (m, 1H), 6.98 (m, 1H), 6.96 (m, 1H), 6.94 (m, 1H), 6.92 (m, 1H), 6.90 (m, 1H), 6.88 (m, 1H), 6.86 (m, 1H), 6.84 (m, 1H), 6.82 (m, 1H), 6.80 (m, 1H), 6.78 (m, 1H), 6.76 (m, 1H), 6.74 (m, 1H), 6.72 (m, 1H), 6.70 (m, 1H), 6.68 (m, 1H), 6.66 (m, 1H), 6.64 (m, 1H), 6.62 (m, 1H), 6.60 (m, 1H), 6.58 (m, 1H), 6.56 (m, 1H), 6.54 (m, 1H), 6.52 (m, 1H), 6.50 (m, 1H), 6.48 (m, 1H), 6.46 (m, 1H), 6.44 (m, 1H), 6.42 (m, 1H), 6.40 (m, 1H), 6.38 (m, 1H), 6.36 (m, 1H), 6.34 (m, 1H), 6.32 (m, 1H), 6.30 (m, 1H), 6.28 (m, 1H), 6.26 (m, 1H), 6.24 (m, 1H), 6.22 (m, 1H), 6.20 (m, 1H), 6.18 (m, 1H), 6.16 (m, 1H), 6.14 (m, 1H), 6.12 (m, 1H), 6.10 (m, 1H), 6.08 (m, 1H), 6.06 (m, 1H), 6.04 (m, 1H), 6.02 (m, 1H), 6.00 (m, 1H), 5.98 (m, 1H), 5.96 (m, 1H), 5.94 (m, 1H), 5.92 (m, 1H), 5.90 (m, 1H), 5.88 (m, 1H), 5.86 (m, 1H), 5.84 (m, 1H), 5.82 (m, 1H), 5.80 (m, 1H), 5.78 (m, 1H), 5.76 (m, 1H), 5.74 (m, 1H), 5.72 (m, 1H), 5.70 (m, 1H), 5.68 (m, 1H), 5.66 (m, 1H), 5.64 (m, 1H), 5.62 (m, 1H), 5.60 (m, 1H), 5.58 (m, 1H), 5.56 (m, 1H), 5.54 (m, 1H), 5.52 (m, 1H), 5.50 (m, 1H), 5.48 (m, 1H), 5.46 (m, 1H), 5.44 (m, 1H), 5.42 (m, 1H), 5.40 (m, 1H), 5.38 (m, 1H), 5.36 (m, 1H), 5.34 (m, 1H), 5.32 (m, 1H), 5.30 (m, 1H), 5.28 (m, 1H), 5.26 (m, 1H), 5.24 (m, 1H), 5.22 (m, 1H), 5.20 (m, 1H), 5.18 (m, 1H), 5.16 (m, 1H), 5.14 (m, 1H), 5.12 (m, 1H), 5.10 (m, 1H), 5.08 (m, 1H), 5.06 (m, 1H), 5.04 (m, 1H), 5.02 (m, 1H), 5.00 (m, 1H), 4.98 (m, 1H), 4.96 (m, 1H), 4.94 (m, 1H), 4.92 (m, 1H), 4.90 (m, 1H), 4.88 (m, 1H), 4.86 (m, 1H), 4.84 (m, 1H), 4.82 (m, 1H), 4.80 (m, 1H), 4.78 (m, 1H), 4.76 (m, 1H), 4.74 (m, 1H), 4.72 (m, 1H), 4.70 (m, 1H), 4.68 (m, 1H), 4.66 (m, 1H), 4.64 (m, 1H), 4.62 (m, 1H), 4.60 (m, 1H), 4.58 (m, 1H), 4.56 (m, 1H), 4.54 (m, 1H), 4.52 (m, 1H), 4.50 (m, 1H), 4.48 (m, 1H), 4.46 (m, 1H), 4.44 (m, 1H), 4.42 (m, 1H), 4.40 (m, 1H), 4.38 (m, 1H), 4.36 (m, 1H), 4.34 (m, 1H), 4.32 (m, 1H), 4.30 (m, 1H), 4.28 (m, 1H), 4.26 (m, 1H), 4.24 (m, 1H), 4.22 (m, 1H), 4.20 (m, 1H), 4.18 (m, 1H), 4.16 (m, 1H), 4.14 (m, 1H), 4.12 (m, 1H), 4.10 (m, 1H), 4.08 (m, 1H), 4.06 (m, 1H), 4.04 (m, 1H), 4.02 (m, 1H), 4.00 (m, 1H), 3.98 (m, 1H), 3.96 (m, 1H), 3.94 (m, 1H), 3.92 (m, 1H), 3.90 (m, 1H), 3.88 (m, 1H), 3.86 (m, 1H), 3.84 (m, 1H), 3.82 (m, 1H), 3.80 (m, 1H), 3.78 (m, 1H), 3.76 (m, 1H), 3.74 (m, 1H), 3.72 (m, 1H), 3.70 (m, 1H), 3.68 (m, 1H), 3.66 (m, 1H), 3.64 (m, 1H), 3.62 (m, 1H), 3.60 (m, 1H), 3.58 (m, 1H), 3.56 (m, 1H), 3.54 (m, 1H), 3.52 (m, 1H), 3.50 (m, 1H), 3.48 (m, 1H), 3.46 (m, 1H), 3.44 (m, 1H), 3.42 (m, 1H), 3.40 (m, 1H), 3.38 (m, 1H), 3.36 (m, 1H), 3.34 (m, 1H), 3.32 (m, 1H), 3.30 (m, 1H), 3.28 (m, 1H), 3.26 (m, 1H), 3.24 (m, 1H), 3.22 (m, 1H), 3.20 (m, 1H), 3.18 (m, 1H), 3.16 (m, 1H), 3.14 (m, 1H), 3.12 (m, 1H), 3.10 (m, 1H), 3.08 (m, 1H), 3.06 (m, 1H), 3.04 (m, 1H), 3.02 (m, 1H), 3.00 (m, 1H), 2.98 (m, 1H), 2.96 (m, 1H), 2.94 (m, 1H), 2.92 (m, 1H), 2.90 (m, 1H), 2.88 (m, 1H), 2.86 (m, 1H), 2.84 (m, 1H), 2.82 (m, 1H), 2.80 (m, 1H), 2.78 (m, 1H), 2.76 (m, 1H), 2.74 (m, 1H), 2.72 (m, 1H), 2.70 (m, 1H), 2.68 (m, 1H), 2.66 (m, 1H), 2.64 (m, 1H), 2.62 (m, 1H), 2.60 (m, 1H), 2.58 (m, 1H), 2.56 (m, 1H), 2.54 (m, 1H), 2.52 (m, 1H), 2.50 (m, 1H), 2.48 (m, 1H), 2.46 (m, 1H), 2.44 (m, 1H), 2.42 (m, 1H), 2.40 (m, 1H), 2.38 (m, 1H), 2.36 (m, 1H), 2.34 (m, 1H), 2.32 (m, 1H), 2.30 (m, 1H), 2.28 (m, 1H), 2.26 (m, 1H), 2.24 (m, 1H), 2.22 (m, 1H), 2.20 (m, 1H), 2.18 (m, 1H), 2.16 (m, 1H), 2.14 (m, 1H), 2.12 (m, 1H), 2.10 (m, 1H), 2.08 (m, 1H), 2.06 (m, 1H), 2.04 (m, 1H), 2.02 (m, 1H), 2.00 (m, 1H), 1.98 (m, 1H), 1.96 (m, 1H), 1.94 (m, 1H), 1.92 (m, 1H), 1.90 (m, 1H), 1.88 (m, 1H), 1.86 (m, 1H), 1.84 (m, 1H), 1.82 (m, 1H), 1.80 (m, 1H), 1.78 (m, 1H), 1.76 (m, 1H), 1.74 (m, 1H), 1.72 (m, 1H), 1.70 (m, 1H), 1.68 (m, 1H), 1.66 (m, 1H), 1.64 (m, 1H), 1.62 (m, 1H), 1.60 (m, 1H), 1.58 (m, 1H), 1.56 (m, 1H), 1.54 (m, 1H), 1.52 (m, 1H), 1.50 (m, 1H), 1.48 (m, 1H), 1.46 (m, 1H), 1.44 (m, 1H), 1.42 (m, 1H), 1.40 (m, 1H), 1.38 (m, 1H), 1.36 (m, 1H), 1.34 (m, 1H), 1.32 (m, 1H), 1.30 (m, 1H), 1.28 (m, 1H), 1.26 (m, 1H), 1.24 (m, 1H), 1.22 (m, 1H), 1.20 (m, 1H), 1.18 (m, 1H), 1.16 (m, 1H), 1.14 (m, 1H), 1.12 (m, 1H), 1.10 (m, 1H), 1.08 (m, 1H), 1.06 (m, 1H), 1.04 (m, 1H), 1.02 (m, 1H), 1.00 (m, 1H), 0.98

END-737 13C.20.fid

Chemical structure of S6: CC1(C)OC2C(C1OC3C(C2)OC(C3)SC4=CC=C(C=C4)Cl)OC(C5=CC=CC=C5)OC6=CC=CC=C6

**S6**

13C NMR peaks (ppm):

- 167.7992
- 167.2115
- 137.6565
- 136.2613
- 134.9761
- 134.6911
- 133.9670
- 133.9602
- 129.9522
- 128.9522
- 128.9503
- 126.0775
- 123.4583
- 101.3633
- 78.7672
- 78.7769
- 76.3776
- 74.2523
- 70.4498
- 68.6275
- 54.7214

**6c**

O[C@H]1[C@@H](OC(=O)c2ccccc2)[C@H](OC(=O)c3ccccc3)[C@@H](O)[C@H]1SCc4ccc(Cl)cc4

<sup>1</sup>H NMR spectrum of compound **6c** in CDCl<sub>3</sub>. The spectrum shows peaks from 0 to 8.5 ppm. Key features include a broad peak at ~7.2 ppm (NH), aromatic signals between 6.5-7.5 ppm, a multiplet at ~4.5 ppm, a doublet at ~3.8 ppm, and a singlet at ~2.1 ppm. Integration values are provided below the baseline. The chemical structure of **6c** is shown as an inset.

RA-PhthNOBnOBN 13C

168.5568  
167.4699  
138.0145  
137.8044  
136.9807  
134.9104  
134.0980  
131.6649  
130.9761  
130.7393  
129.7693  
129.2225  
128.9761  
128.4472  
127.5605  
123.5821  
78.3525  
78.1722  
78.0905  
77.8088  
77.6291  
77.4507  
61.8457  
55.5513

Chemical structure of **6c** is shown, featuring a substituted tetrahydropyran ring with a phthalimide group, a benzoyl group, a hydroxyl group, and a 4-chlorophenylthio group.

6c

f1 (ppm)

<sup>1</sup>H NMR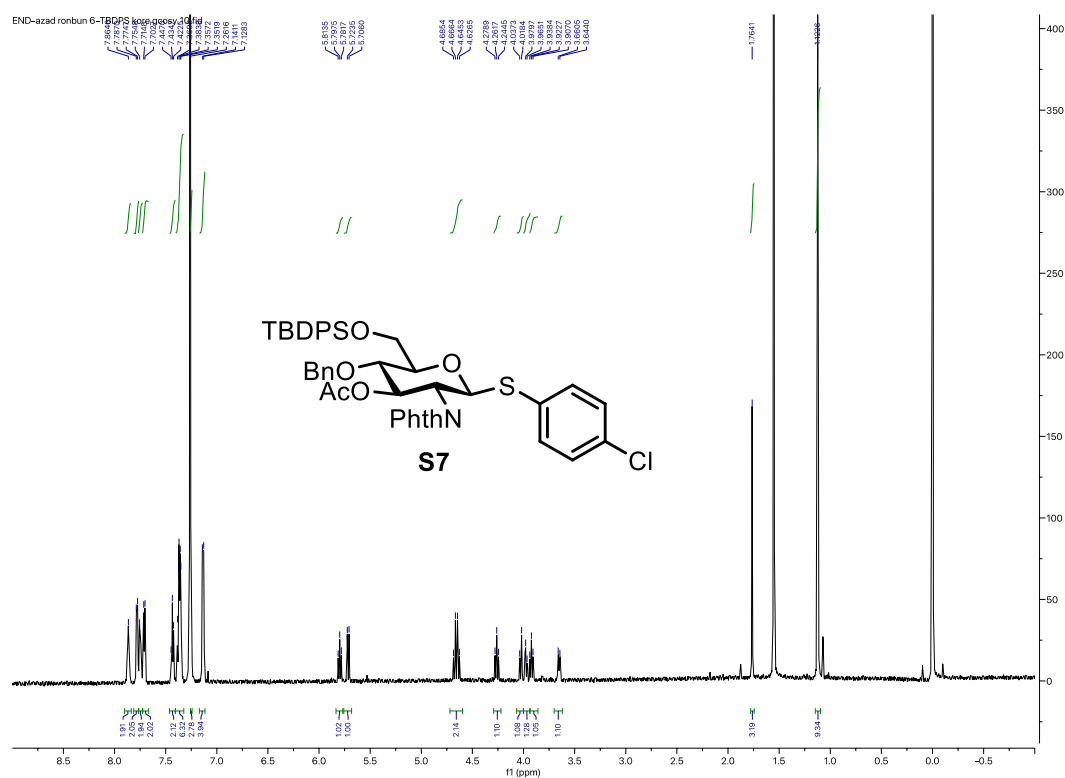<sup>13</sup>C NMR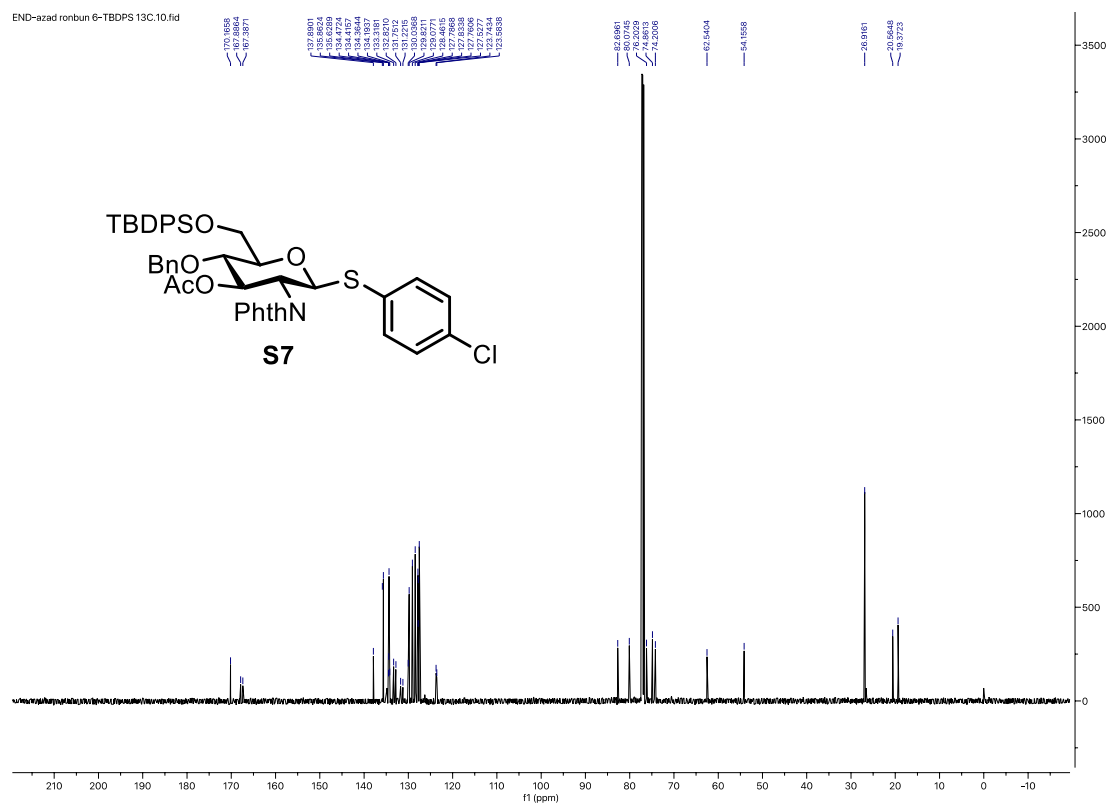

[illegible]

END-azad ronbun NH2 dep 13C.10.fid

Chemical structure of S8 is shown above the spectrum. The structure is a sugar derivative with a TBDPSO group, a BnO group, a hydroxyl group, an amino group, and a 4-chlorophenylthio group.

Peak list (ppm):

- 138.2014
- 137.8515
- 136.8549
- 136.2009
- 133.9549
- 133.8583
- 133.5803
- 133.5785
- 131.7151
- 129.7566
- 129.7525
- 129.6998
- 129.6968
- 127.8028
- 127.7909
- 127.7158
- 89.2523
- 79.98533
- 78.3394
- 77.9853
- 74.77863
- 62.9154
- 56.1023
- 28.88963
- 19.9562

<sup>1</sup>H NMR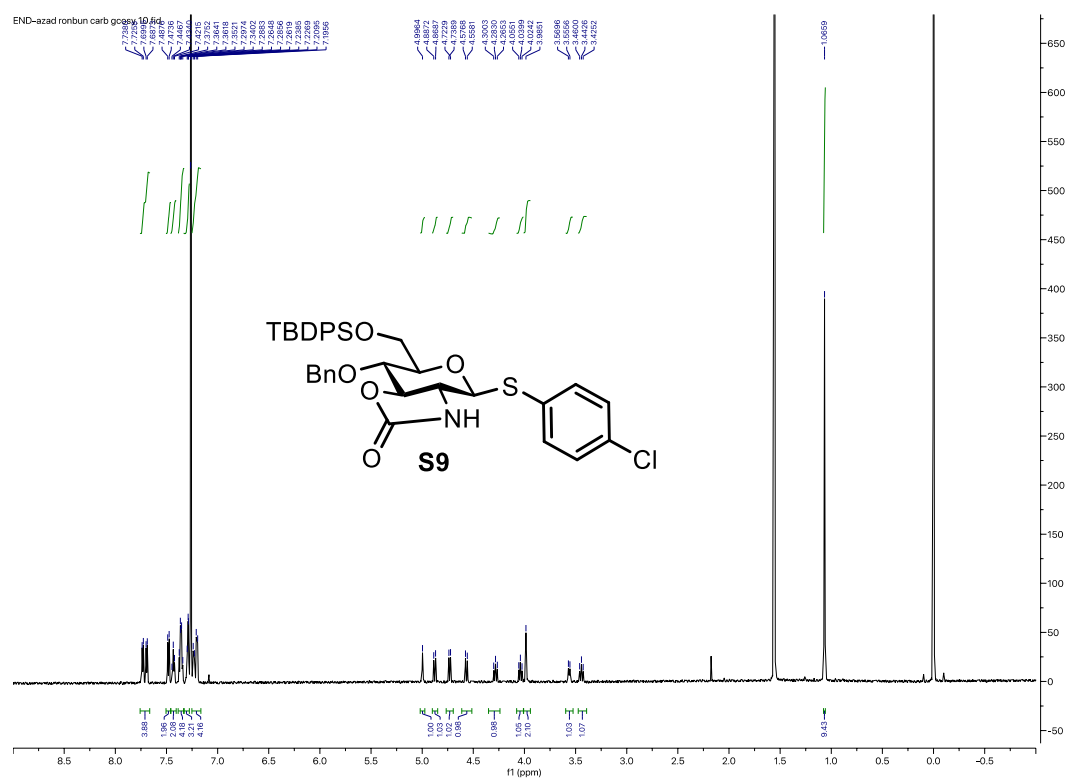<sup>13</sup>C NMR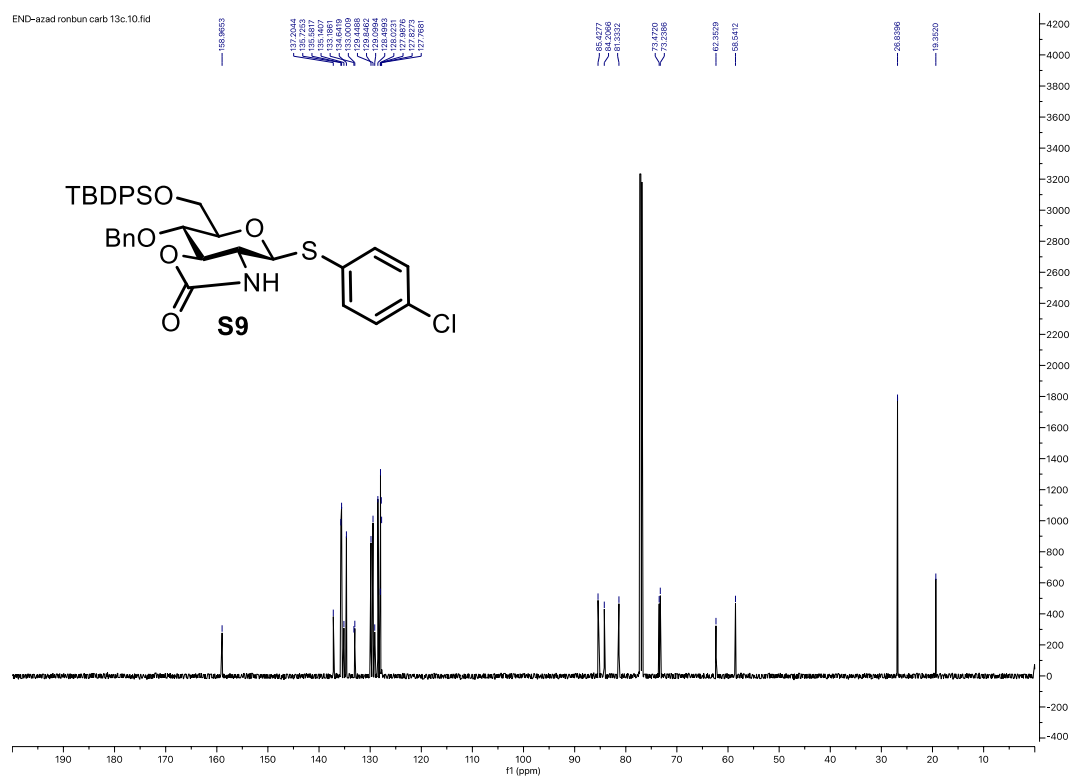

# <sup>1</sup>H NMR

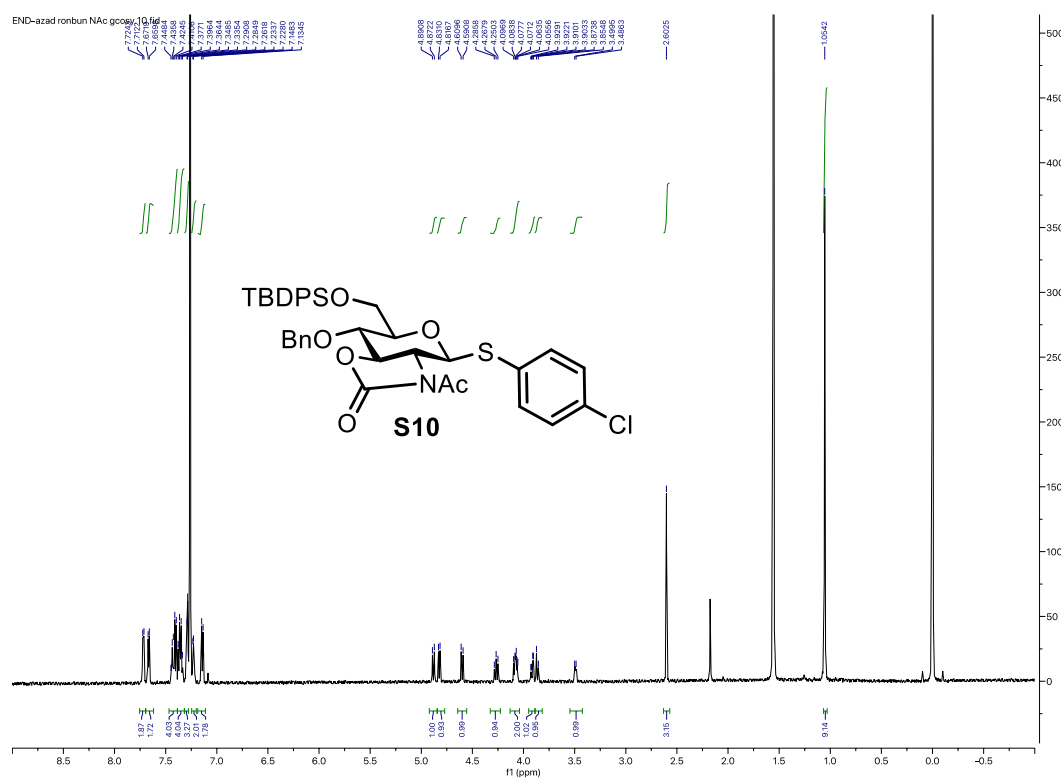

# <sup>1</sup>H NMR

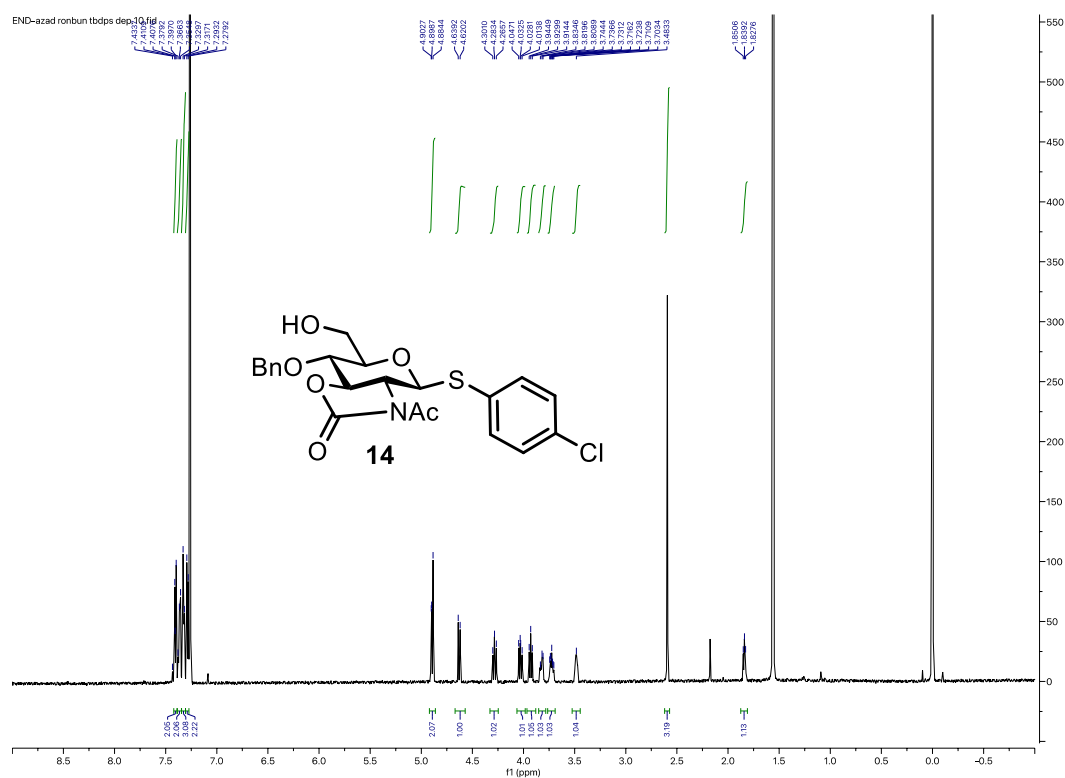

# <sup>13</sup>C NMR

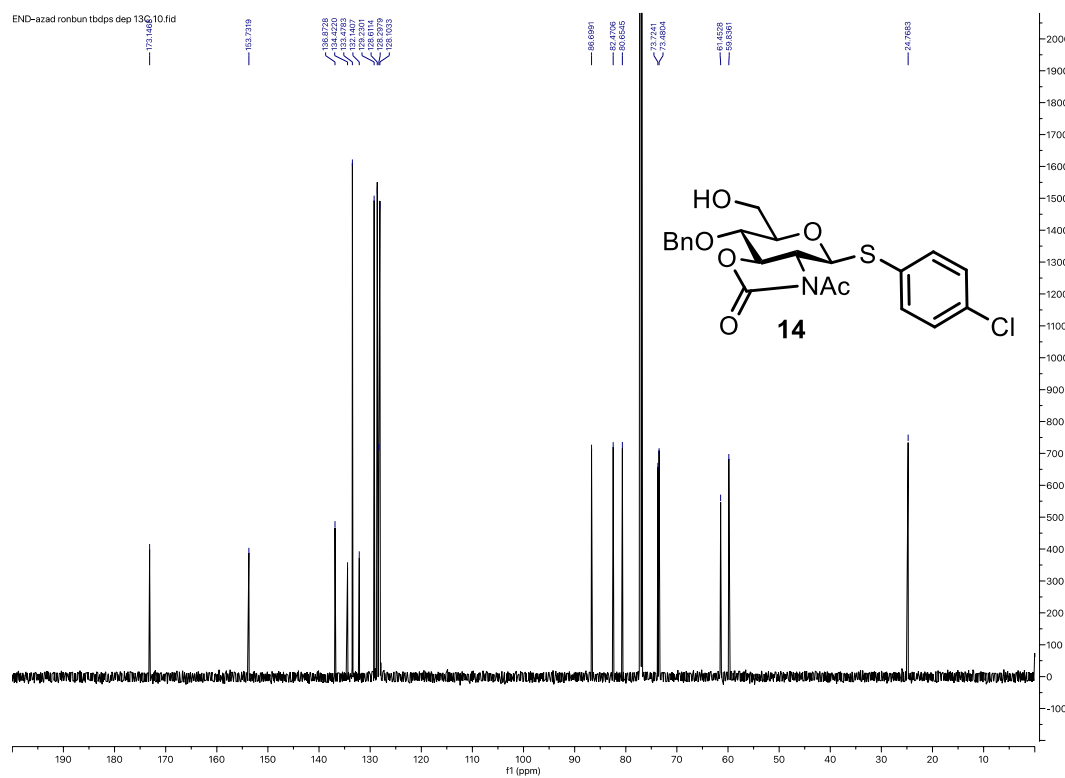

<sup>1</sup>H NMR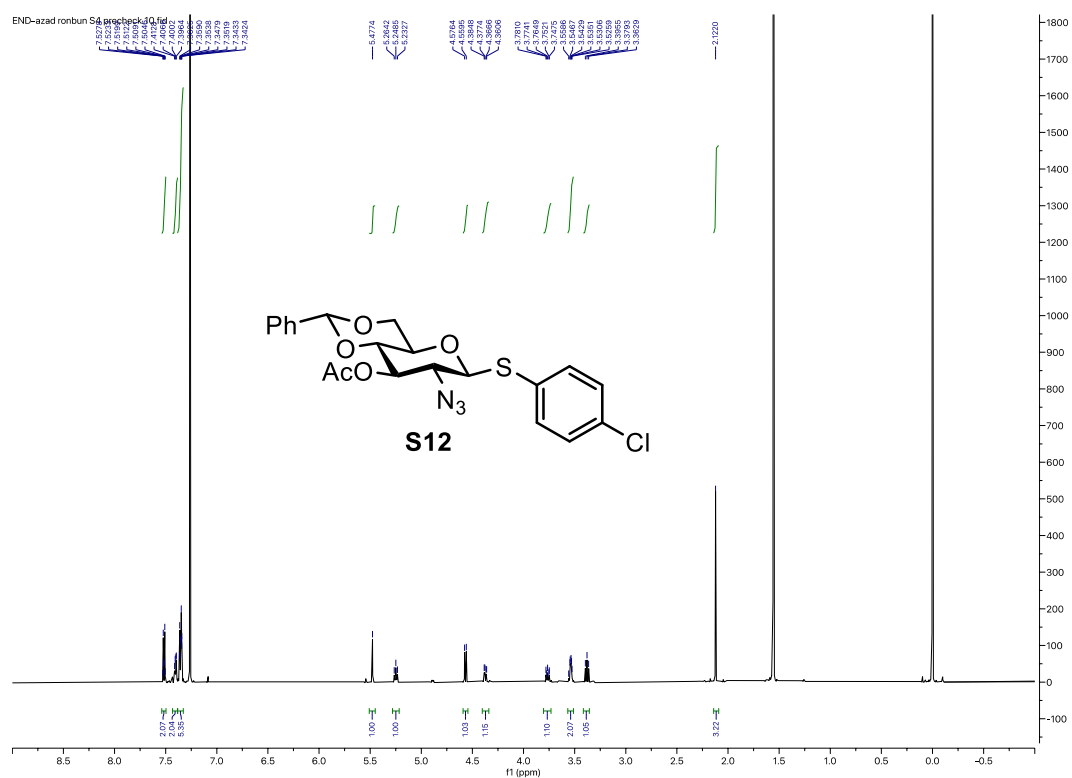<sup>13</sup>C NMR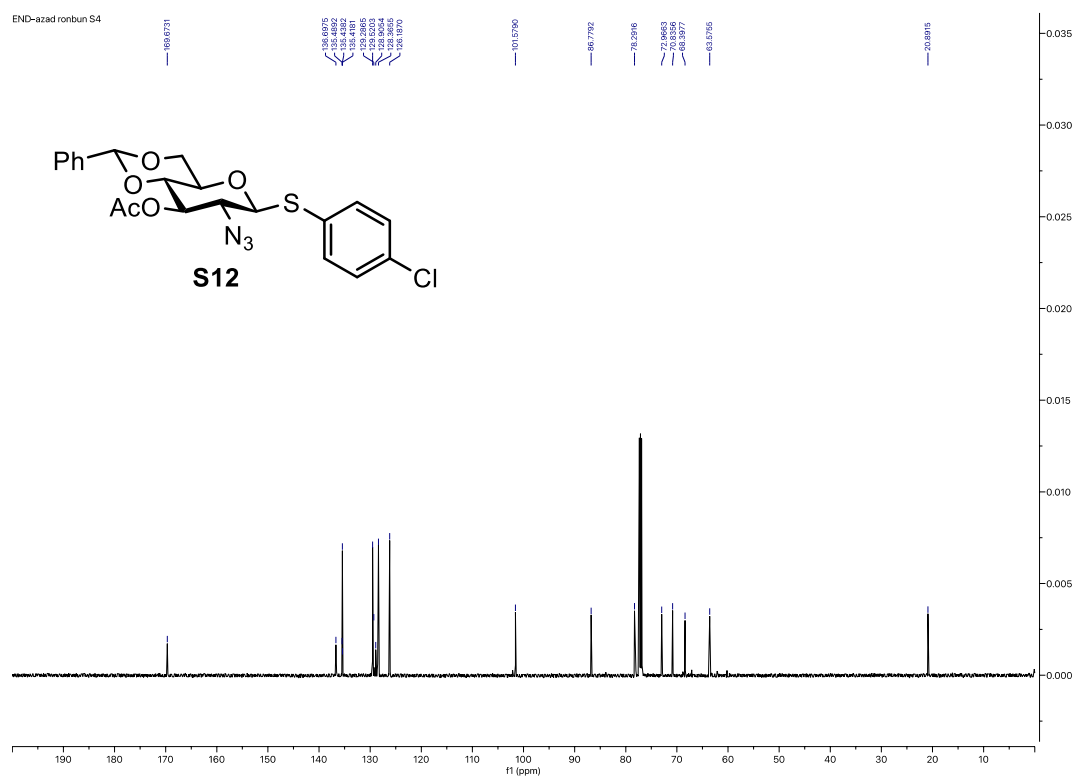



# <sup>1</sup>H NMR

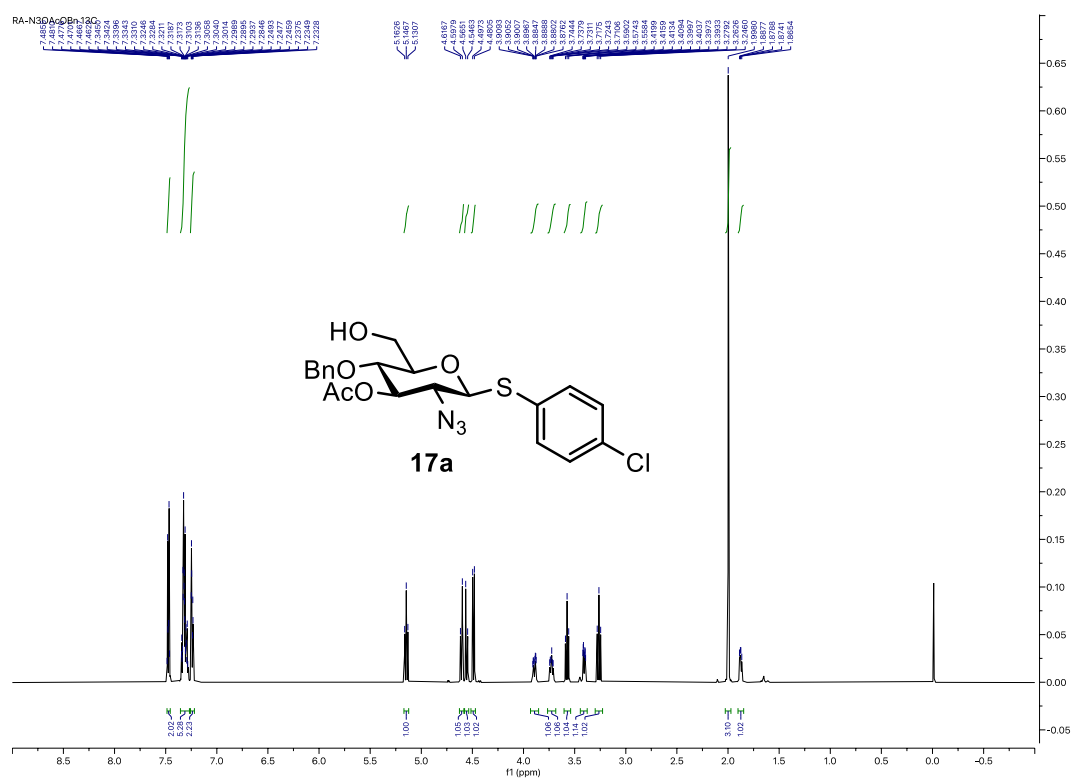

# <sup>13</sup>C NMR

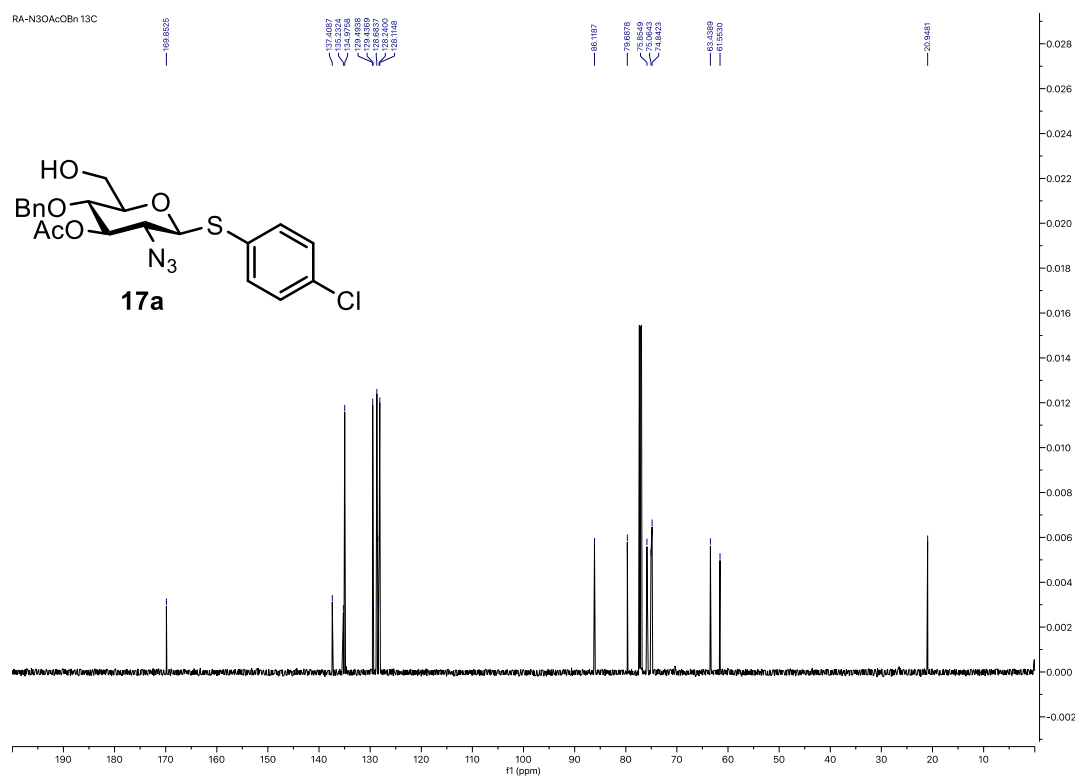

# <sup>1</sup>H NMR

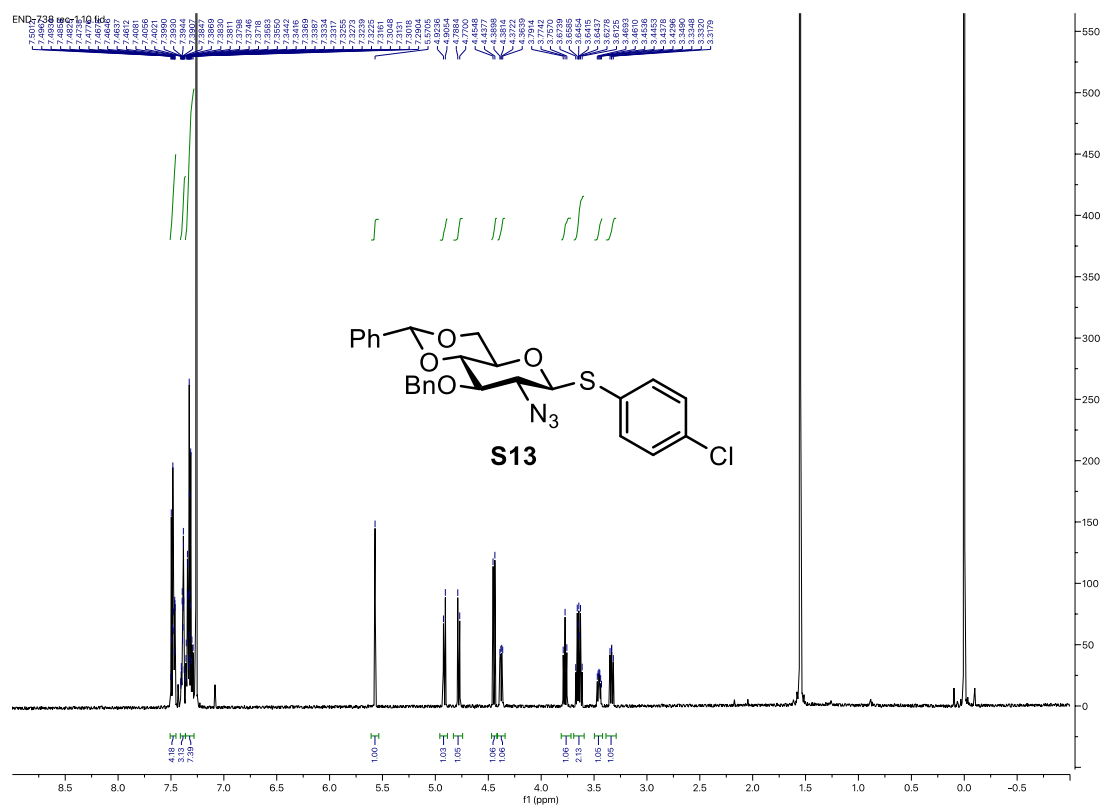

# <sup>13</sup>C NMR

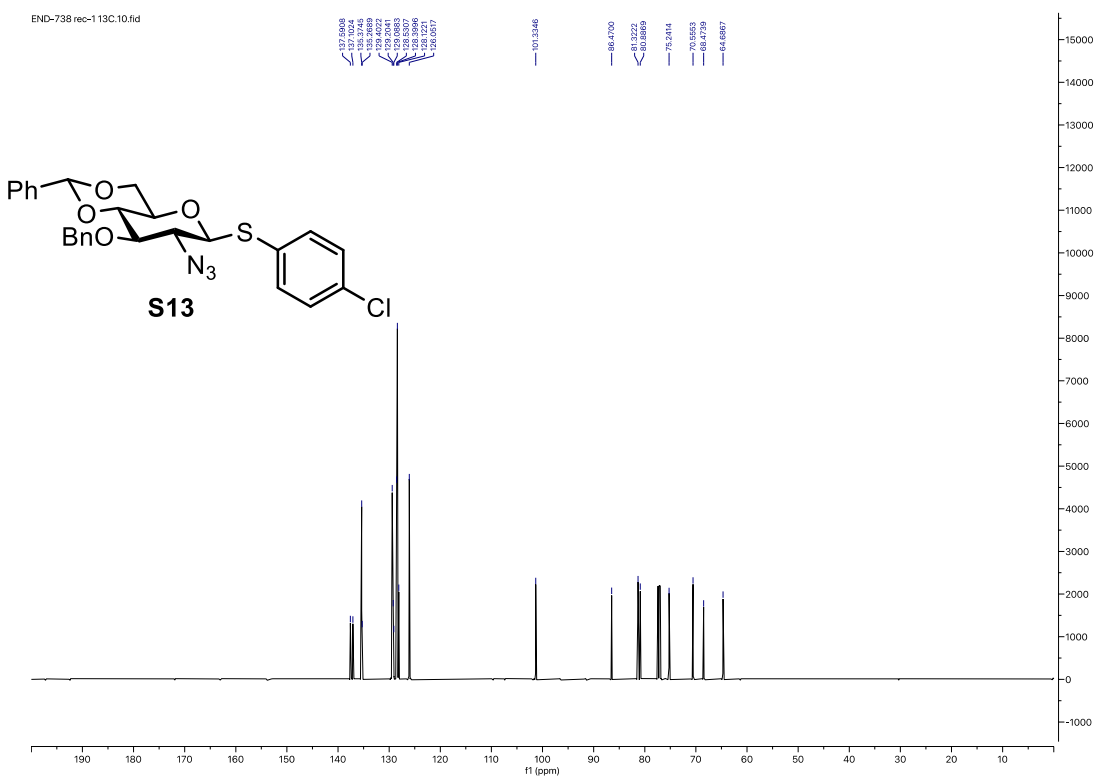

<sup>1</sup>H NMR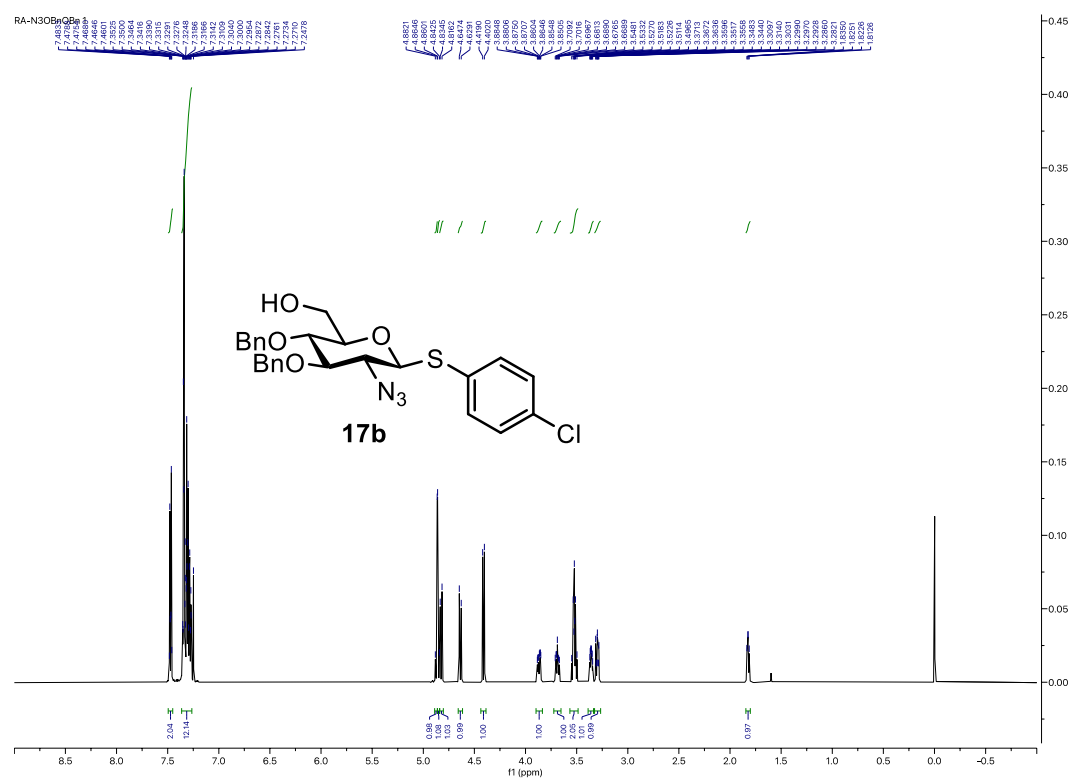<sup>13</sup>C NMR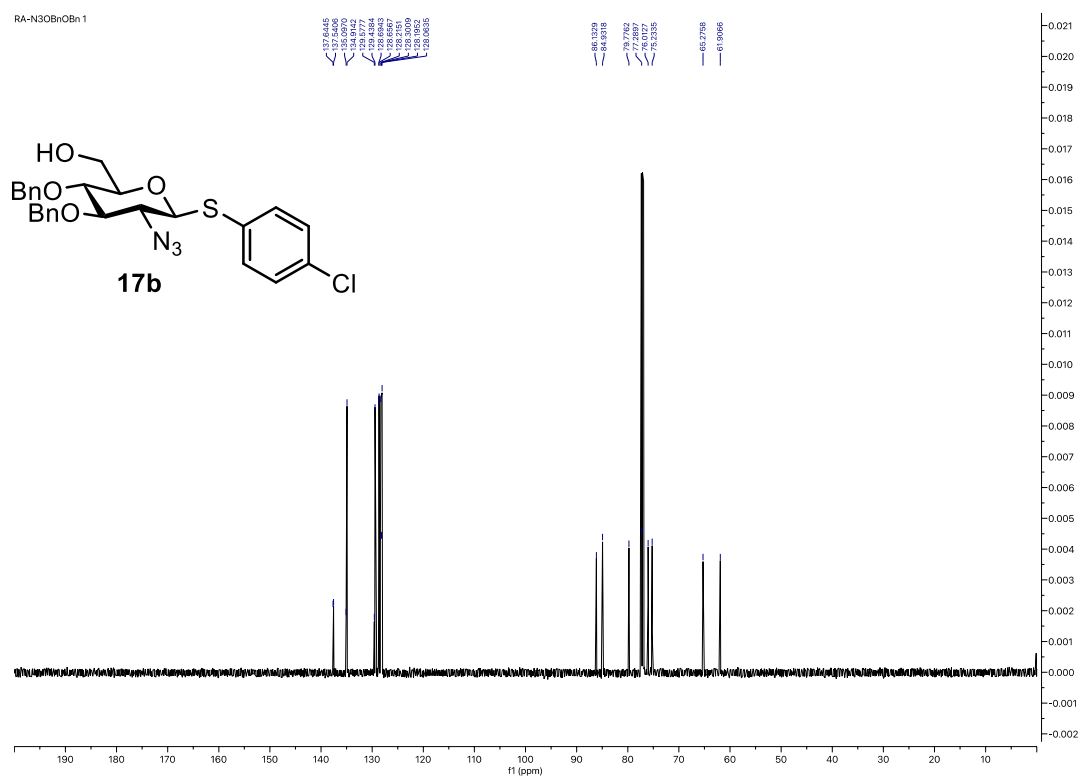

RA-266 f1-6

7.8397  
7.8146  
7.8055  
7.7925  
7.7590  
7.7310  
7.7233  
7.5346  
7.5303  
7.3183  
7.3148  
7.2950  
7.2907  
7.2873  
7.2843  
7.2825  
7.2799  
7.2771  
7.2739

5.7171  
5.7029  
5.6984  
5.6854

4.9332  
4.8900  
4.8707  
4.7277  
4.7143  
4.6913  
4.6813  
4.6692  
4.6652  
4.6607  
4.6585  
4.6568  
4.6572  
4.6522  
4.6499  
4.6459  
4.6422  
4.6372  
4.6332  
4.6292  
4.6252  
4.6212  
4.6172  
4.6132  
4.6092  
4.6052  
4.6012  
4.5972  
4.5932  
4.5892  
4.5852  
4.5812  
4.5772  
4.5732  
4.5692  
4.5652  
4.5612  
4.5572  
4.5532  
4.5492  
4.5452  
4.5412  
4.5372  
4.5332  
4.5292  
4.5252  
4.5212  
4.5172  
4.5132  
4.5092  
4.5052  
4.5012  
4.4972  
4.4932  
4.4892  
4.4852  
4.4812  
4.4772  
4.4732  
4.4692  
4.4652  
4.4612  
4.4572  
4.4532  
4.4492  
4.4452  
4.4412  
4.4372  
4.4332  
4.4292  
4.4252  
4.4212  
4.4172  
4.4132  
4.4092  
4.4052  
4.4012  
4.3972  
4.3932  
4.3892  
4.3852  
4.3812  
4.3772  
4.3732  
4.3692  
4.3652  
4.3612  
4.3572  
4.3532  
4.3492  
4.3452  
4.3412  
4.3372  
4.3332  
4.3292  
4.3252  
4.3212  
4.3172  
4.3132  
4.3092  
4.3052  
4.3012  
4.2972  
4.2932  
4.2892  
4.2852  
4.2812  
4.2772  
4.2732  
4.2692  
4.2652  
4.2612  
4.2572  
4.2532  
4.2492  
4.2452  
4.2412  
4.2372  
4.2332  
4.2292  
4.2252  
4.2212  
4.2172  
4.2132  
4.2092  
4.2052  
4.2012  
4.1972  
4.1932  
4.1892  
4.1852  
4.1812  
4.1772  
4.1732  
4.1692  
4.1652  
4.1612  
4.1572  
4.1532  
4.1492  
4.1452  
4.1412  
4.1372  
4.1332  
4.1292  
4.1252  
4.1212  
4.1172  
4.1132  
4.1092  
4.1052  
4.1012  
4.0972  
4.0932  
4.0892  
4.0852  
4.0812  
4.0772  
4.0732  
4.0692  
4.0652  
4.0612  
4.0572  
4.0532  
4.0492  
4.0452  
4.0412  
4.0372  
4.0332  
4.0292  
4.0252  
4.0212  
4.0172  
4.0132  
4.0092  
4.0052  
4.0012  
3.9972  
3.9932  
3.9892  
3.9852  
3.9812  
3.9772  
3.9732  
3.9692  
3.9652  
3.9612  
3.9572  
3.9532  
3.9492  
3.9452  
3.9412  
3.9372  
3.9332  
3.9292  
3.9252  
3.9212  
3.9172  
3.9132  
3.9092  
3.9052  
3.9012  
3.8972  
3.8932  
3.8892  
3.8852  
3.8812  
3.8772  
3.8732  
3.8692  
3.8652  
3.8612  
3.8572  
3.8532  
3.8492  
3.8452  
3.8412  
3.8372  
3.8332  
3.8292  
3.8252  
3.8212  
3.8172  
3.8132  
3.8092  
3.8052  
3.8012  
3.7972  
3.7932  
3.7892  
3.7852  
3.7812  
3.7772  
3.7732  
3.7692  
3.7652  
3.7612  
3.7572  
3.7532  
3.7492  
3.7452  
3.7412  
3.7372  
3.7332  
3.7292  
3.7252  
3.7212  
3.7172  
3.7132  
3.7092  
3.7052  
3.7012  
3.6972  
3.6932  
3.6892  
3.6852  
3.6812  
3.6772  
3.6732  
3.6692  
3.6652  
3.6612  
3.6572  
3.6532  
3.6492  
3.6452  
3.6412  
3.6372  
3.6332  
3.6292  
3.6252  
3.6212  
3.6172  
3.6132  
3.6092  
3.6052  
3.6012  
3.5972  
3.5932  
3.5892  
3.5852  
3.5812  
3.5772  
3.5732  
3.5692  
3.5652  
3.5612  
3.5572  
3.5532  
3.5492  
3.5452  
3.5412  
3.5372  
3.5332  
3.5292  
3.5252  
3.5212  
3.5172  
3.5132  
3.5092  
3.5052  
3.5012  
3.4972  
3.4932  
3.4892  
3.4852  
3.4812  
3.4772  
3.4732  
3.4692  
3.4652  
3.4612  
3.4572  
3.4532  
3.4492  
3.4452  
3.4412  
3.4372  
3.4332  
3.4292  
3.4252  
3.4212  
3.4172  
3.4132  
3.4092  
3.4052  
3.4012  
3.3972  
3.3932  
3.3892  
3.3852  
3.3812  
3.3772  
3.3732  
3.3692  
3.3652  
3.3612  
3.3572  
3.3532  
3.3492  
3.3452  
3.3412  
3.3372  
3.3332  
3.3292  
3.3252  
3.3212  
3.3172  
3.3132  
3.3092  
3.3052  
3.3012  
3.2972  
3.2932  
3.2892  
3.2852  
3.2812  
3.2772  
3.2732  
3.2692  
3.2652  
3.2612  
3.2572  
3.2532  
3.2492  
3.2452  
3.2412  
3.2372  
3.2332  
3.2292  
3.2252  
3.2212  
3.2172  
3.2132  
3.2092  
3.2052  
3.2012  
3.1972  
3.1932  
3.1892  
3.1852  
3.1812  
3.1772  
3.1732  
3.1692  
3.1652  
3.1612  
3.1572  
3.1532  
3.1492  
3.1452  
3.1412  
3.1372  
3.1332  
3.1292  
3.1252  
3.1212  
3.1172  
3.1132  
3.1092  
3.1052  
3.1012  
3.0972  
3.0932  
3.0892  
3.0852  
3.0812  
3.0772  
3.0732  
3.0692  
3.0652  
3.0612  
3.0572  
3.0532  
3.0492  
3.0452  
3.0412  
3.0372  
3.0332  
3.0292  
3.0252  
3.0212  
3.0172  
3.0132  
3.0092  
3.0052  
3.0012  
2.9972  
2.9932  
2.9892  
2.9852  
2.9812  
2.9772  
2.9732  
2.9692  
2.9652  
2.9612  
2.9572  
2.9532  
2.9492  
2.9452  
2.9412  
2.9372  
2.9332  
2.9292  
2.9252  
2.9212  
2.9172  
2.9132  
2.9092  
2.9052  
2.9012  
2.8972  
2.8932  
2.8892  
2.8852  
2.8812  
2.8772  
2.8732  
2.8692  
2.8652  
2.8612  
2.8572  
2.8532  
2.8492  
2.8452  
2.8412  
2.8372  
2.8332  
2.8292  
2.8252  
2.8212  
2.8172  
2.8132  
2.

Chemical structure of compound **8b** is shown as an inset. The structure is a dimeric molecule with two phthalimide (PhthN) groups, two benzoyloxy (OBn) groups, and two acetoxy (OAc) groups.

<sup>1</sup>H NMR spectrum (CDCl<sub>3</sub>) of compound **8b** is shown. The x-axis is labeled f1 (ppm) and ranges from 190 to 10. The y-axis represents intensity from -0.00 to 0.012. Key peaks are labeled with their chemical shifts: 170.5397, 167.6949, 138.2550, 137.2977, 136.3974, 133.2625, 129.3974, 128.3974, 127.8168, 127.8625, 123.1047, 100.0860, 77.7777, 77.4942, 77.2114, 76.9286, 76.6458, 76.3630, 57.7022, and 20.8637.

$^1\text{H}$ ,  $^1\text{H}$ -COSY

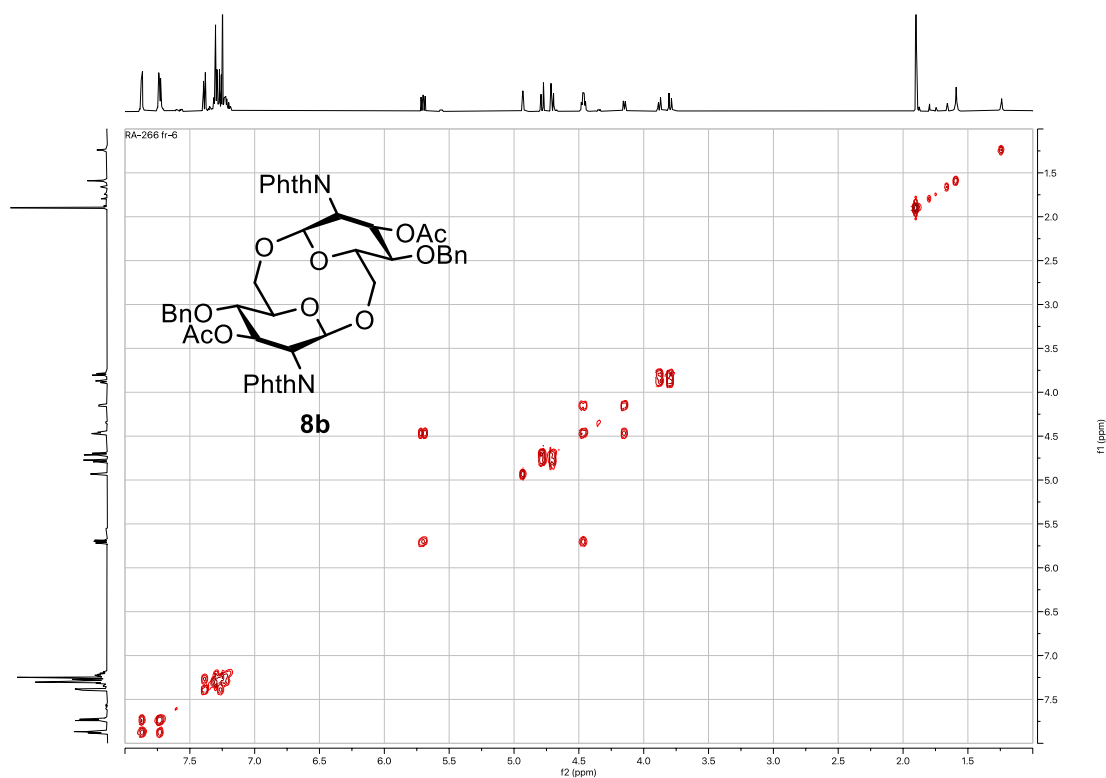

HMQC

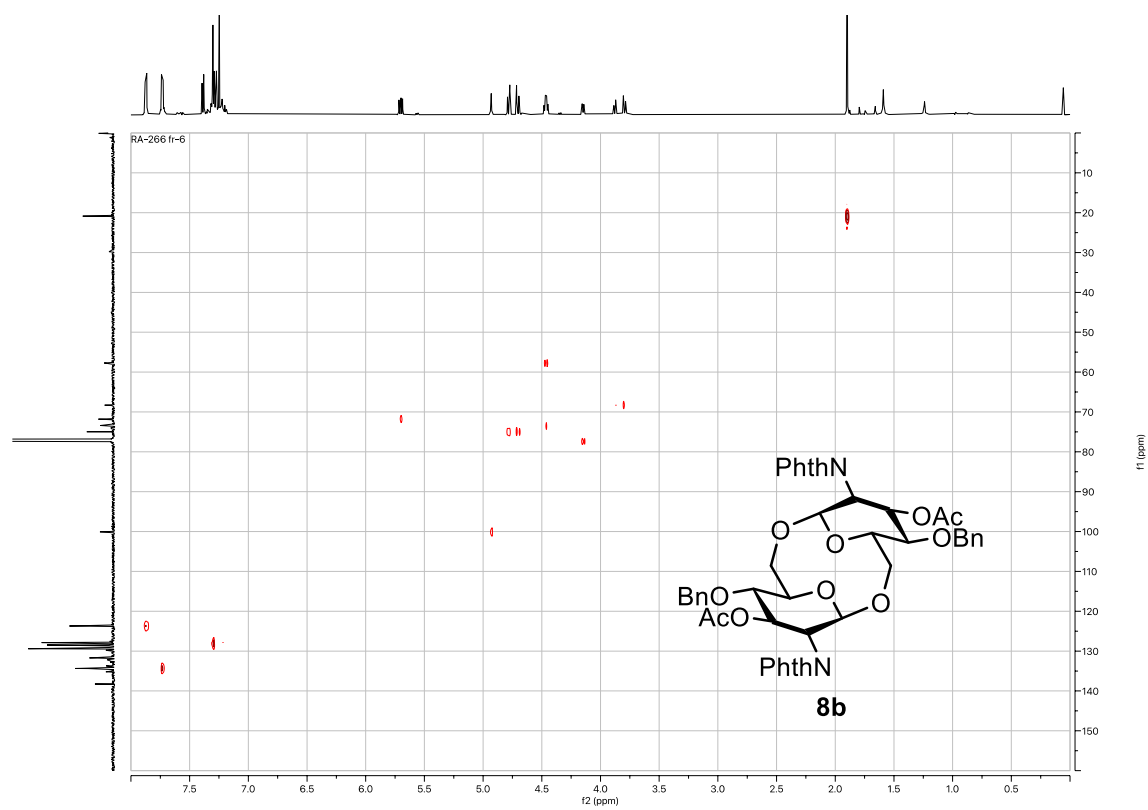

**9b**

Chemical structure of **9b** is shown above the spectrum. The structure is a dimer of a substituted sugar derivative. It consists of two pyranose rings linked by a (1->3) glycosidic bond. The left ring has a PhthN group at C2, a BnO group at C3, and an AcO group at C4. The right ring has a PhthN group at C2, a BnO group at C3, and an AcO group at C4. The right ring is also linked to a 4-chlorophenyl group via a sulfur atom at C1.

<sup>1</sup>H NMR spectrum (CDCl<sub>3</sub>) of compound **9b**. The x-axis represents the chemical shift in ppm (f1), ranging from 0 to 8.5. The y-axis represents the intensity. The spectrum shows several peaks corresponding to the structure of **9b**.

Key peaks and assignments:

- Aromatic protons (PhthN and 4-chlorophenyl): 7.0 - 7.8 ppm.
- Anomeric protons: 4.5 - 5.5 ppm.
- Sugar protons: 3.5 - 4.5 ppm.
- Aliphatic protons (BnO and AcO): 1.5 - 2.5 ppm.
- Solvent peak (CDCl<sub>3</sub>): 7.26 ppm.

Integration values are provided below the baseline:

- 2.19, 4.78, 2.14, 2.89, 3.90, 4.10, 2.15
- 1.00, 1.00, 1.10, 1.10, 1.05
- 1.00, 1.00, 1.05, 1.05, 1.09, 2.27, 2.23, 1.07
- 0.05, 2.80, 3.04

$^1\text{H}$ ,  $^1\text{H}$ -COSY

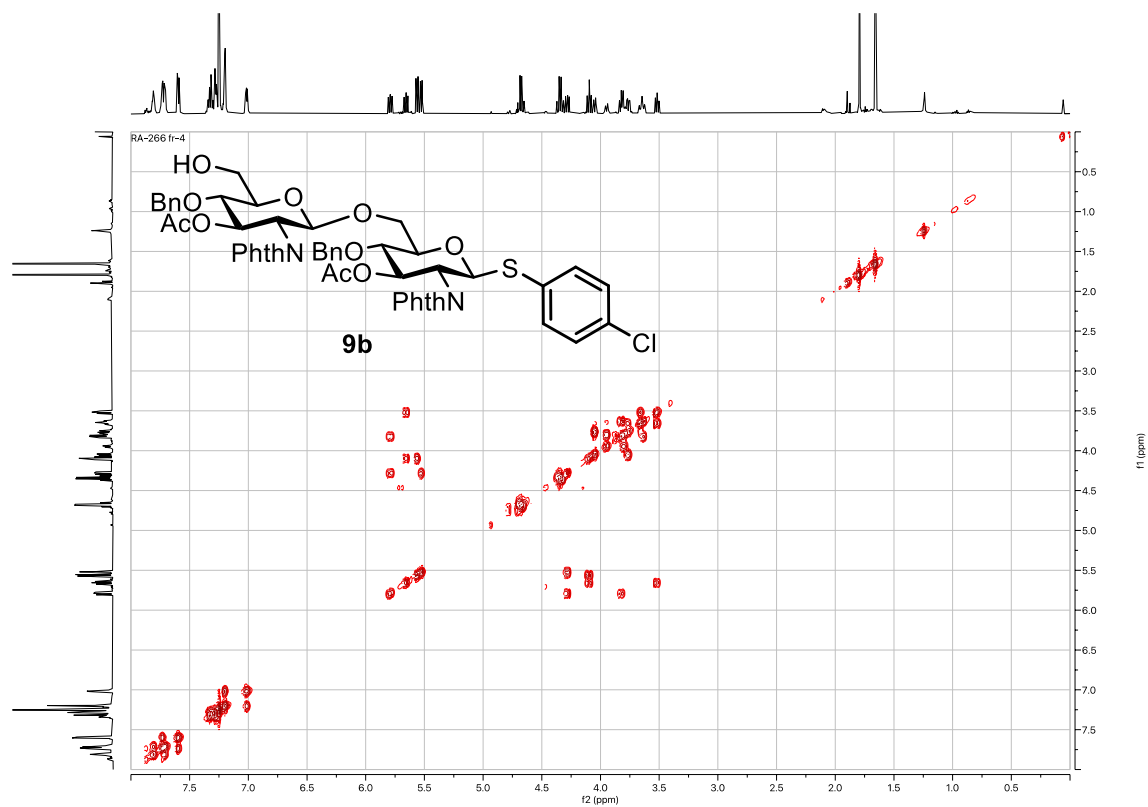

HMQC

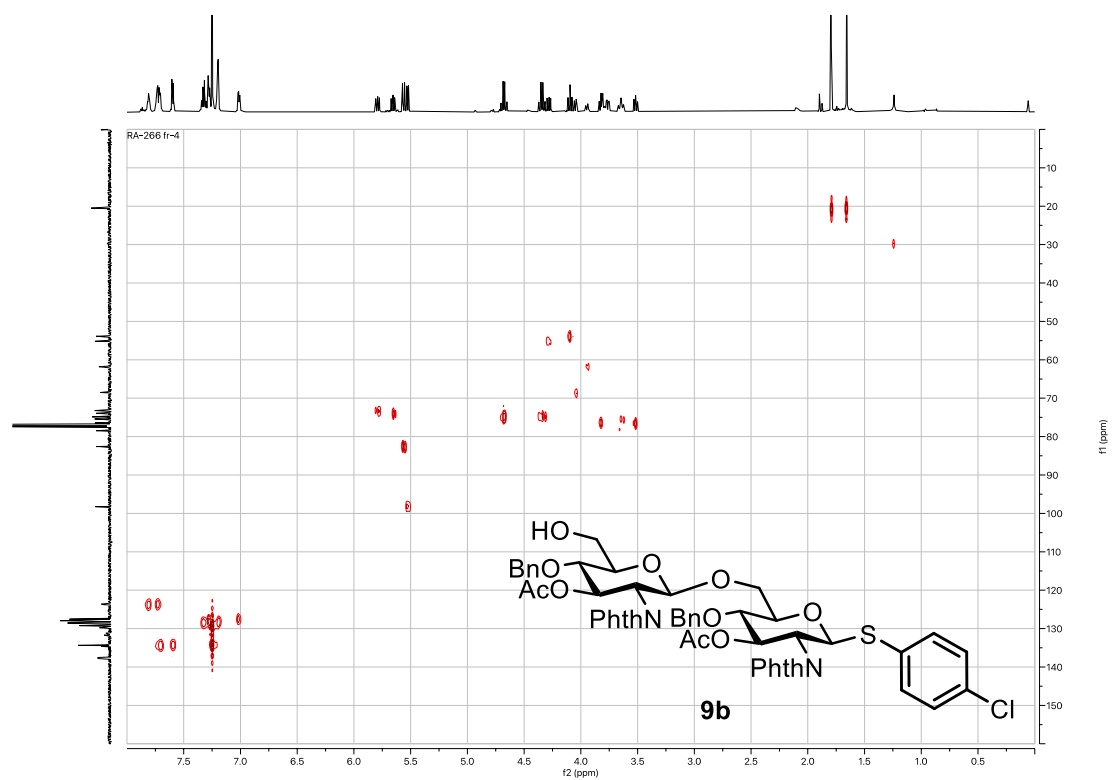

Chemical structure of compound **9c** is shown above the spectrum. The structure is a dimeric molecule consisting of two 2,3,6-tri-O-benzoyl-4-O-(4-chlorophenylthio)- $\alpha$ -D-glucopyranoside units linked by a 1,4-glycosidic bond. The left sugar has a PhthN group at C1, and the right sugar has a PhthN group at C1 and a 4-chlorophenylthio group at C4.

[illegible]



$^1\text{H}$ ,  $^1\text{H}$ -COSY

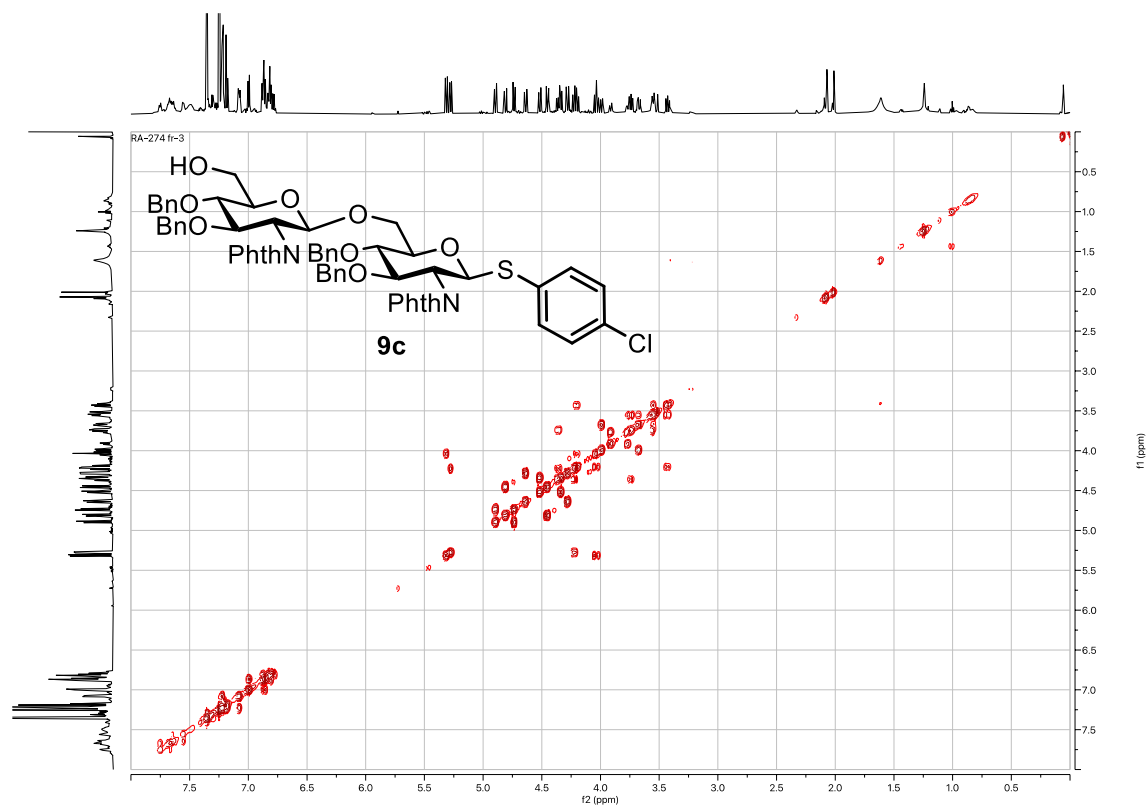

HMQC

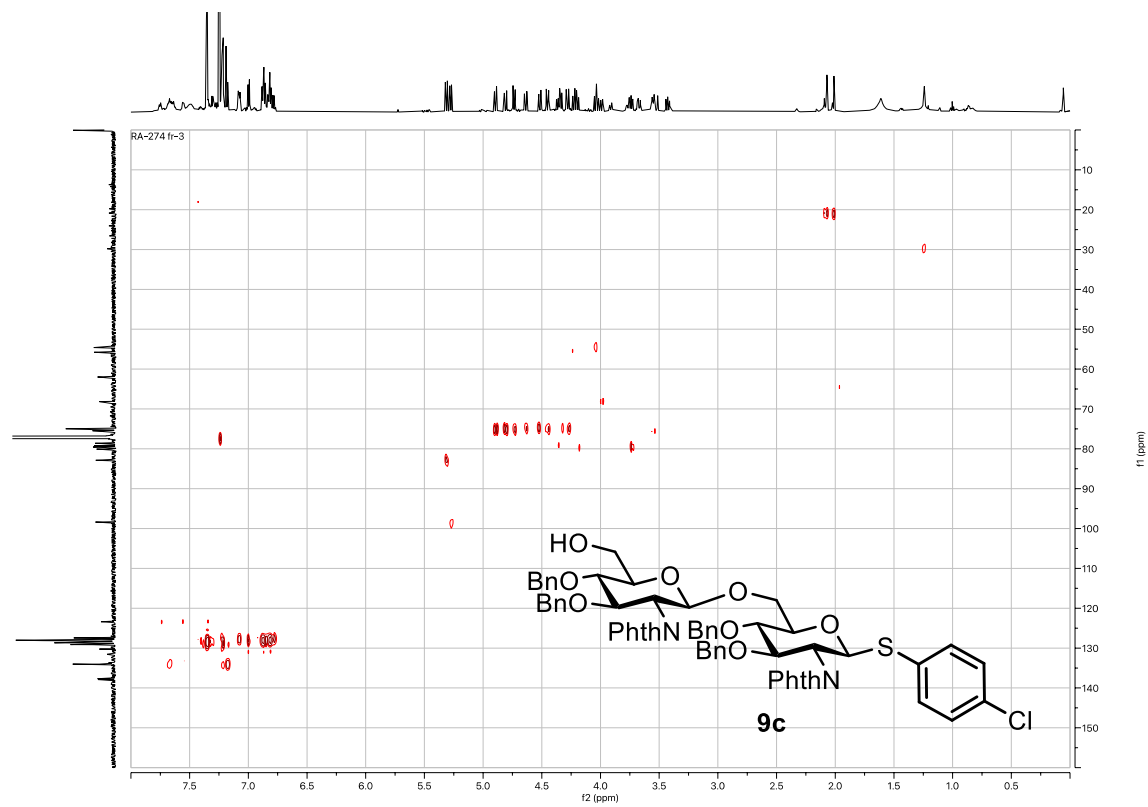

[illegible]

RA-266 fr-1 purified

$^1\text{H}$ ,  $^1\text{H}$ -COSY

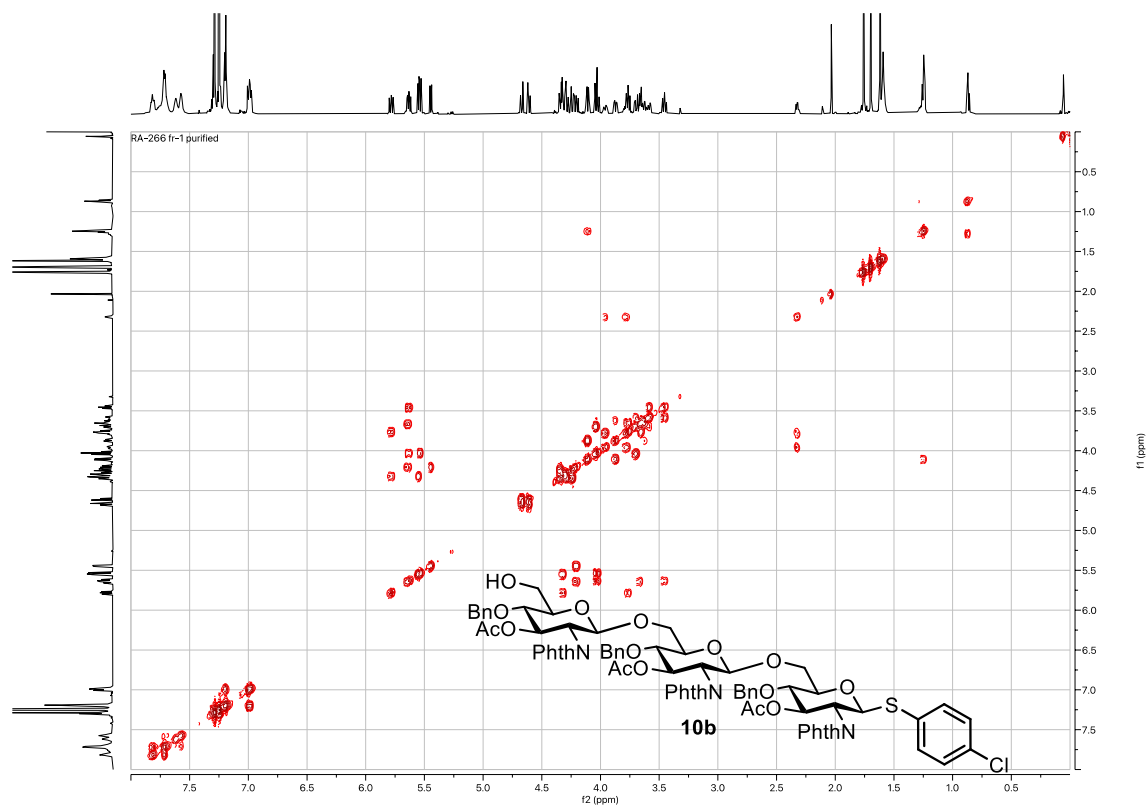

HMQC

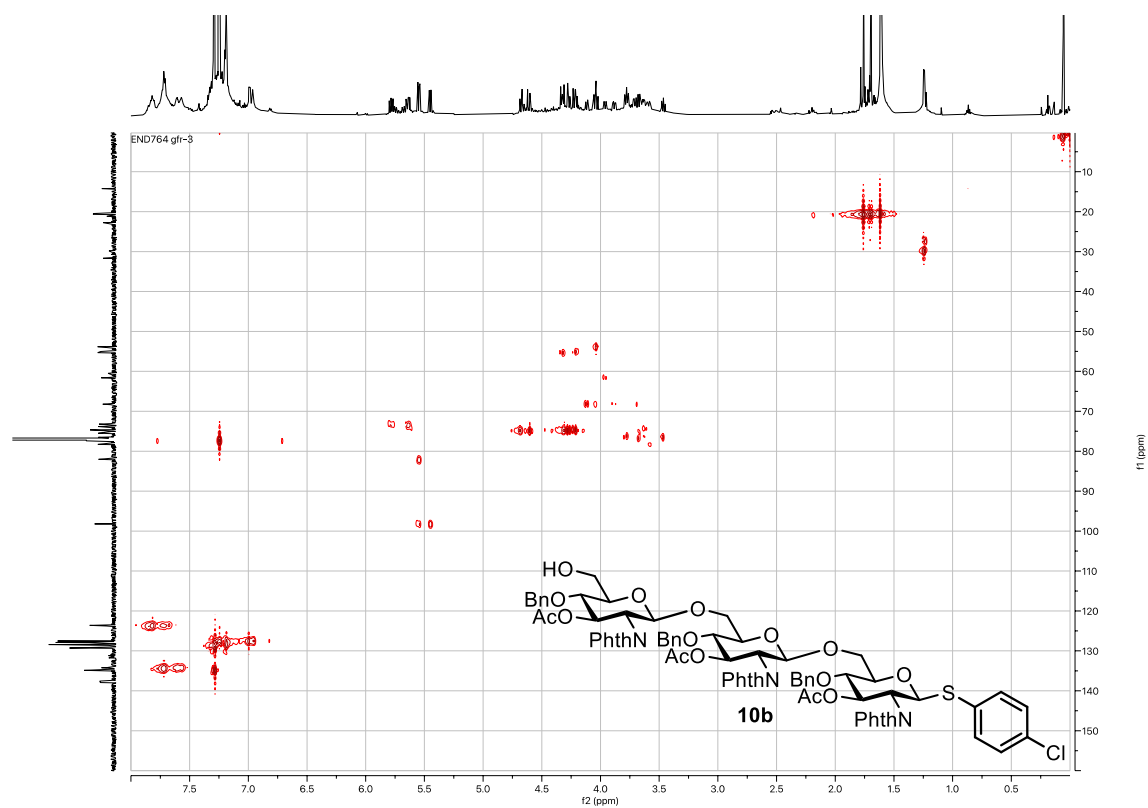

# <sup>1</sup>H NMR

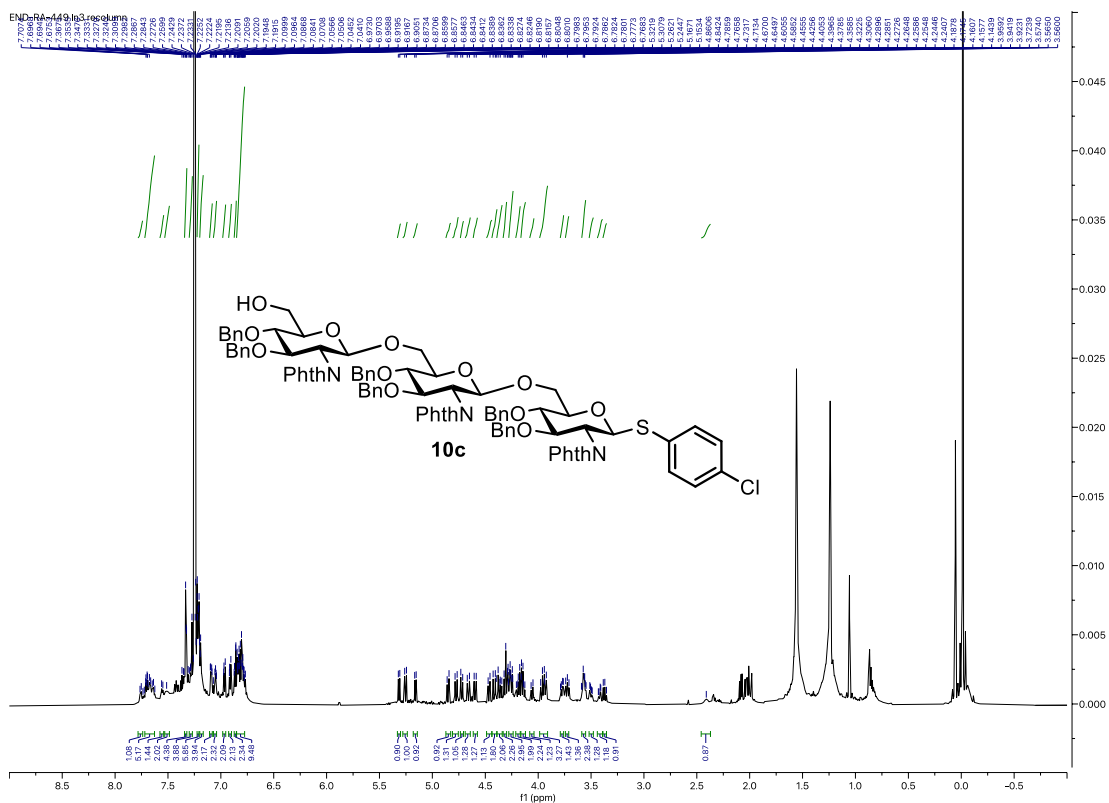

# <sup>13</sup>C NMR

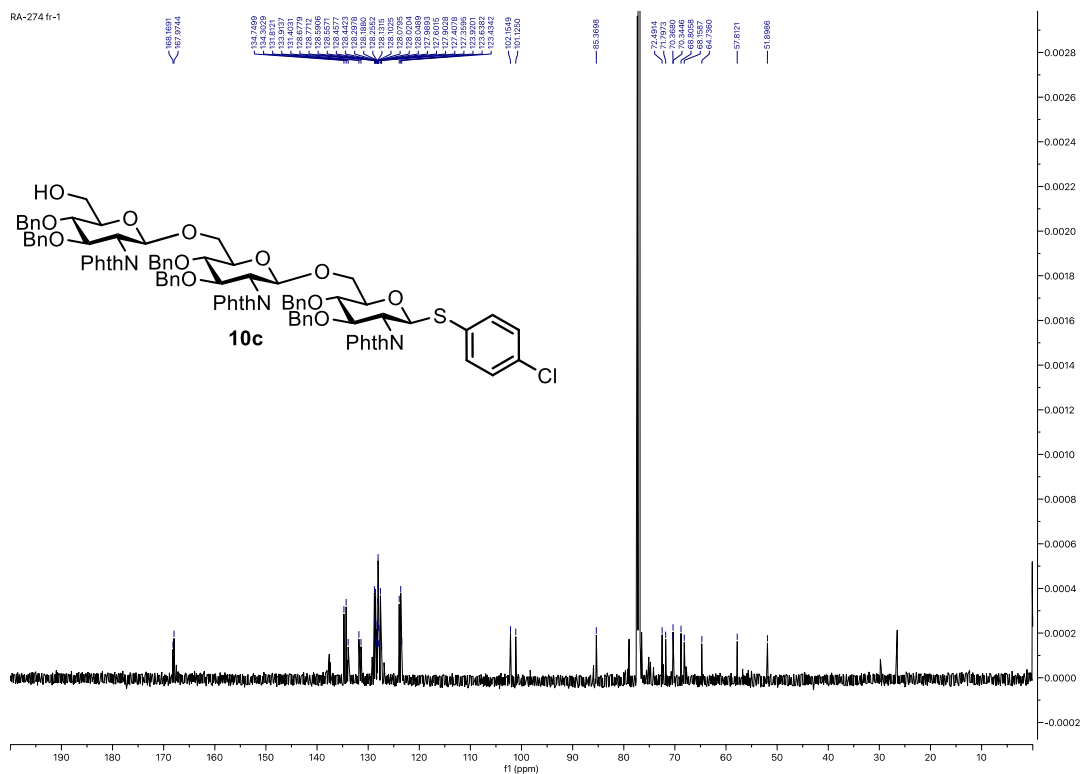

$^1\text{H}$ ,  $^1\text{H}$ -COSY

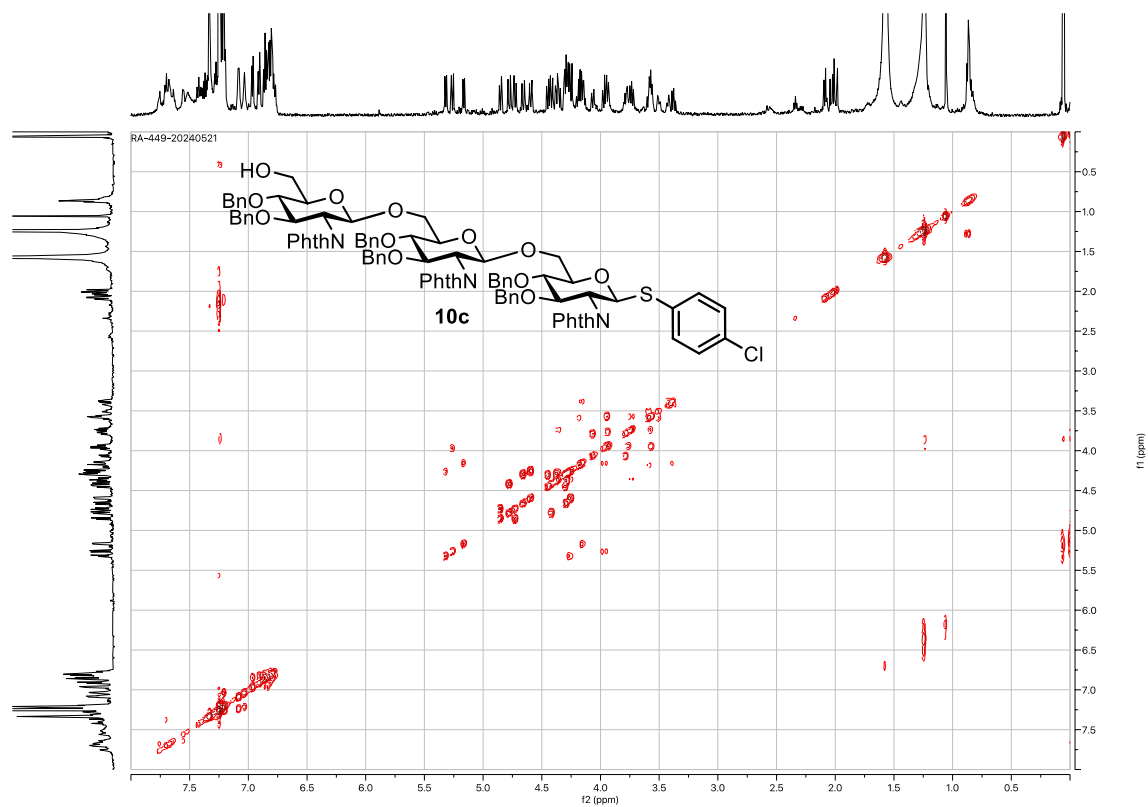

HMQC

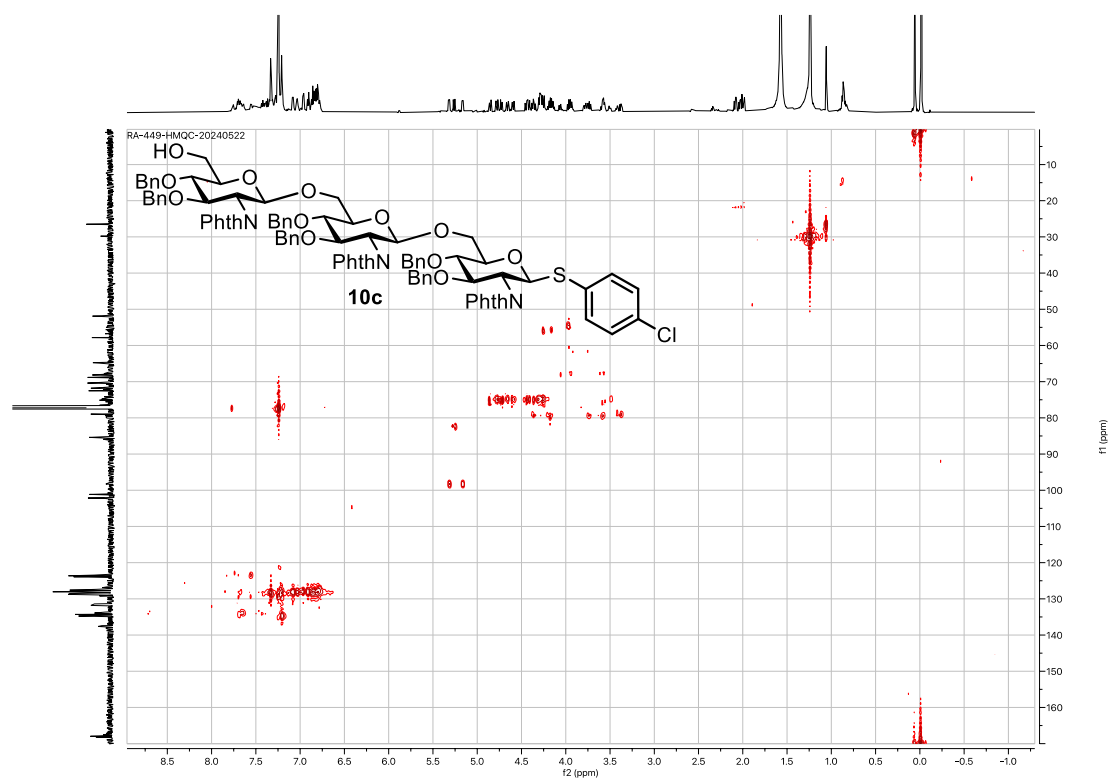

<sup>1</sup>H NMR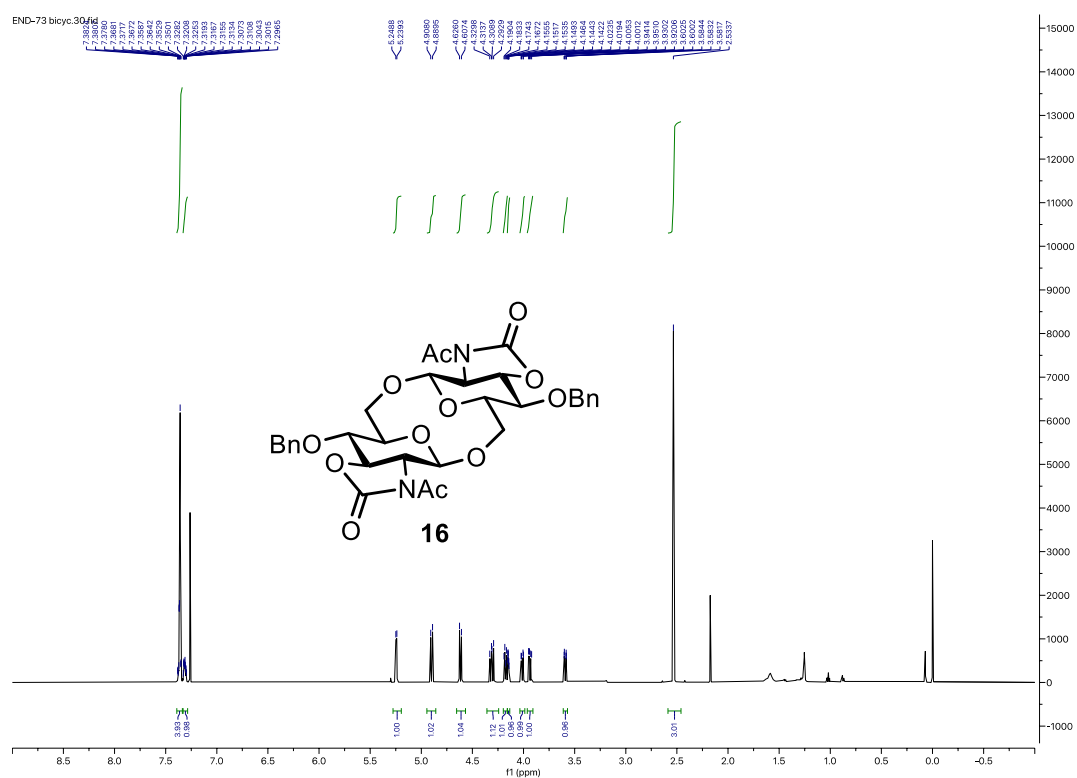<sup>13</sup>C NMR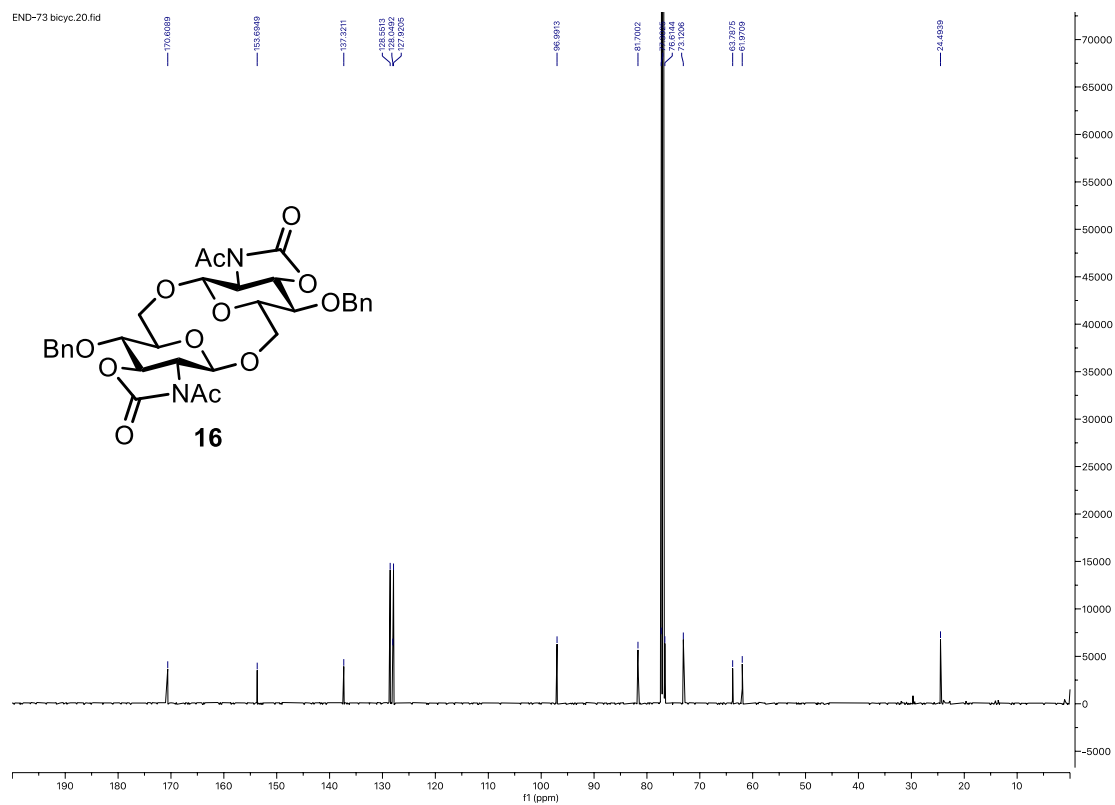

$^1\text{H}$ ,  $^1\text{H}$ -COSY

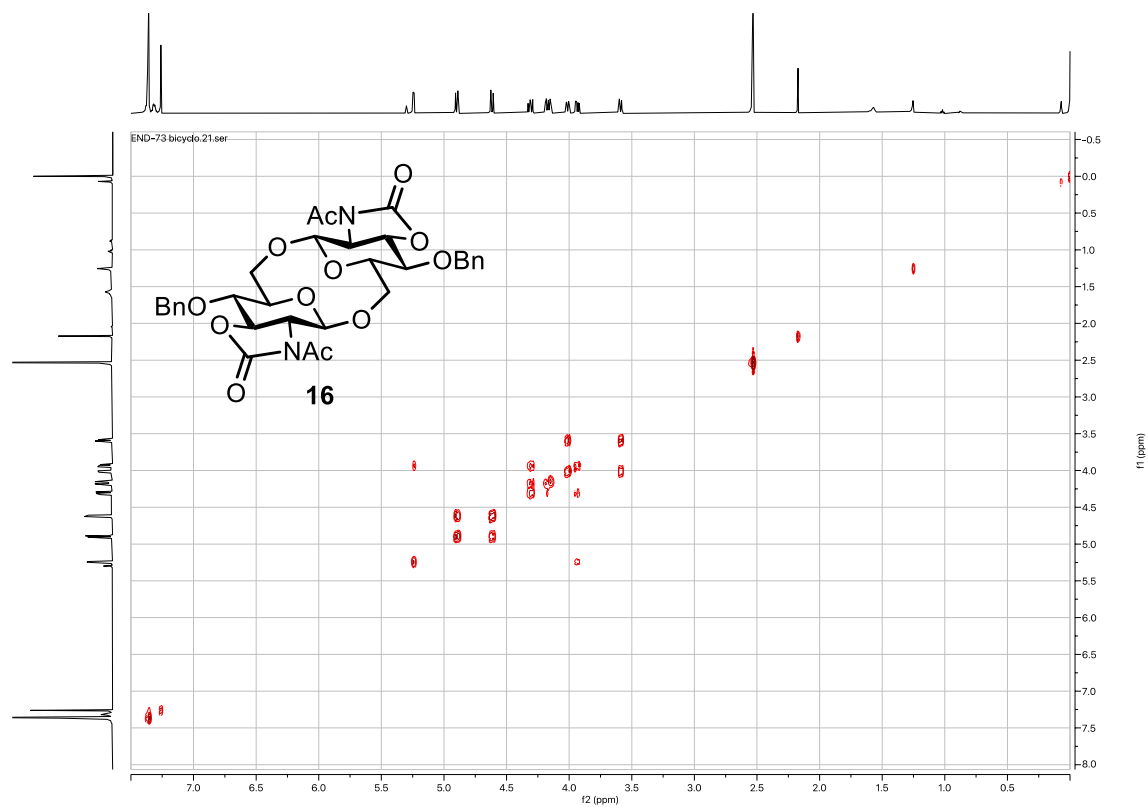

$^{13}\text{C}$  NMR

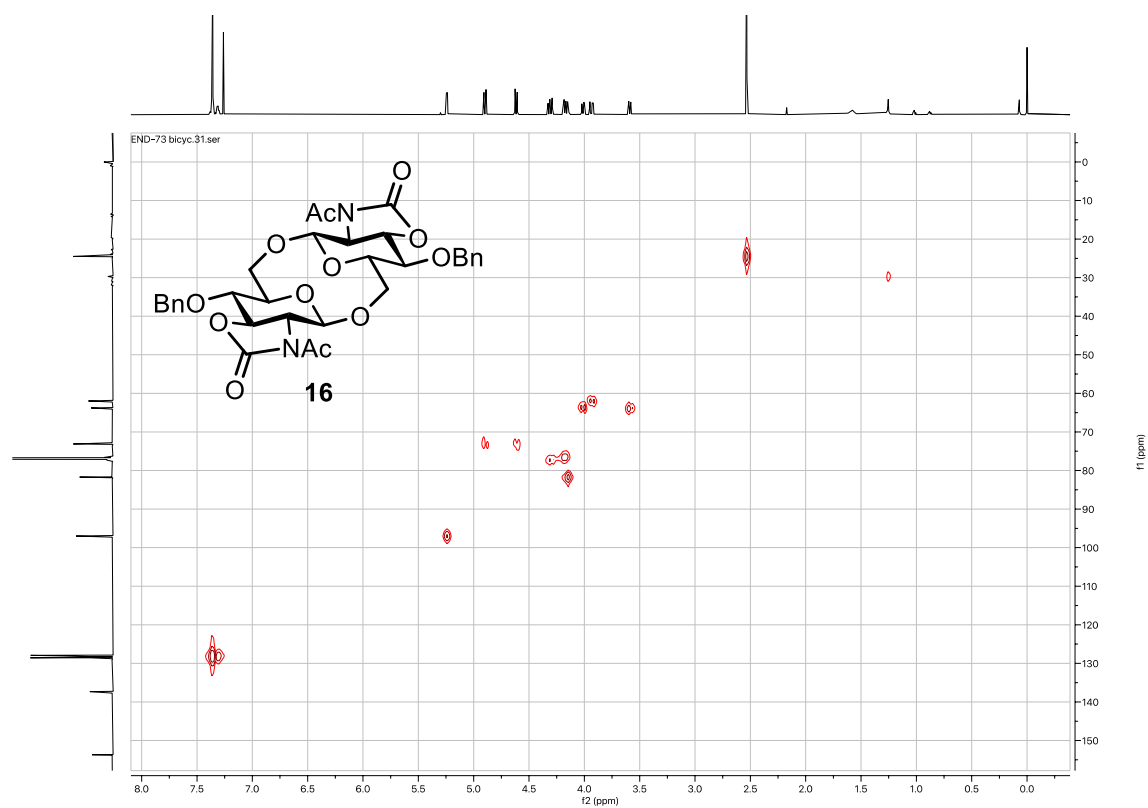

# <sup>1</sup>H NMR

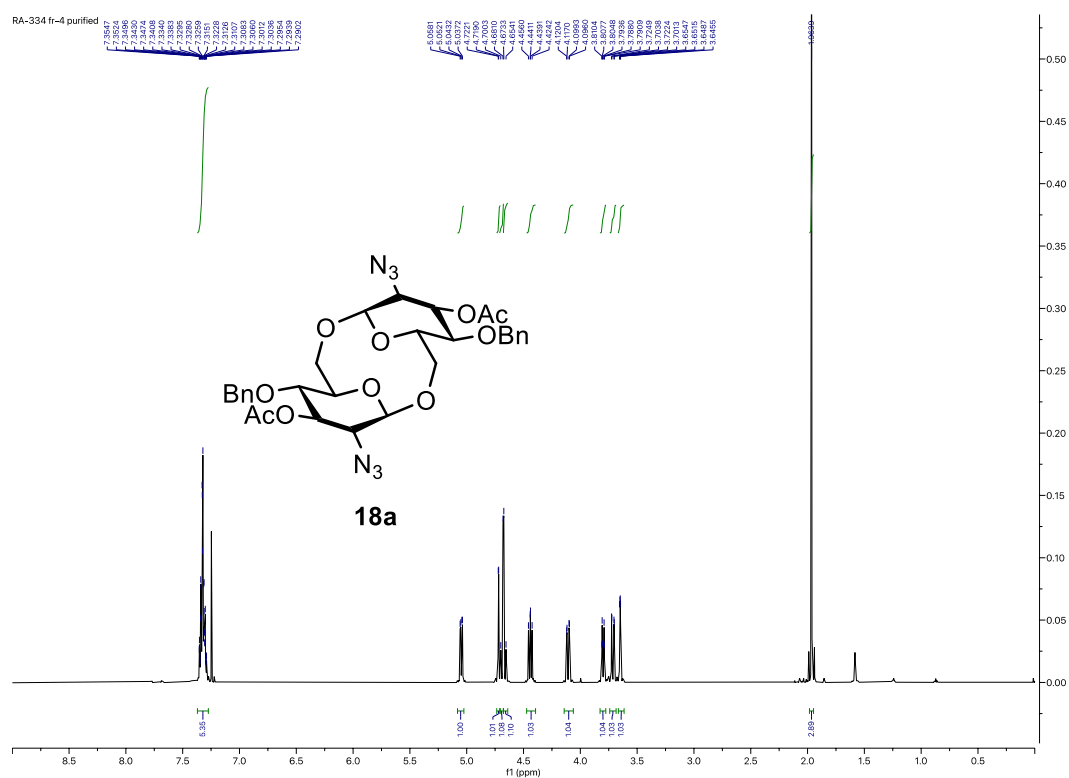

# <sup>13</sup>C NMR

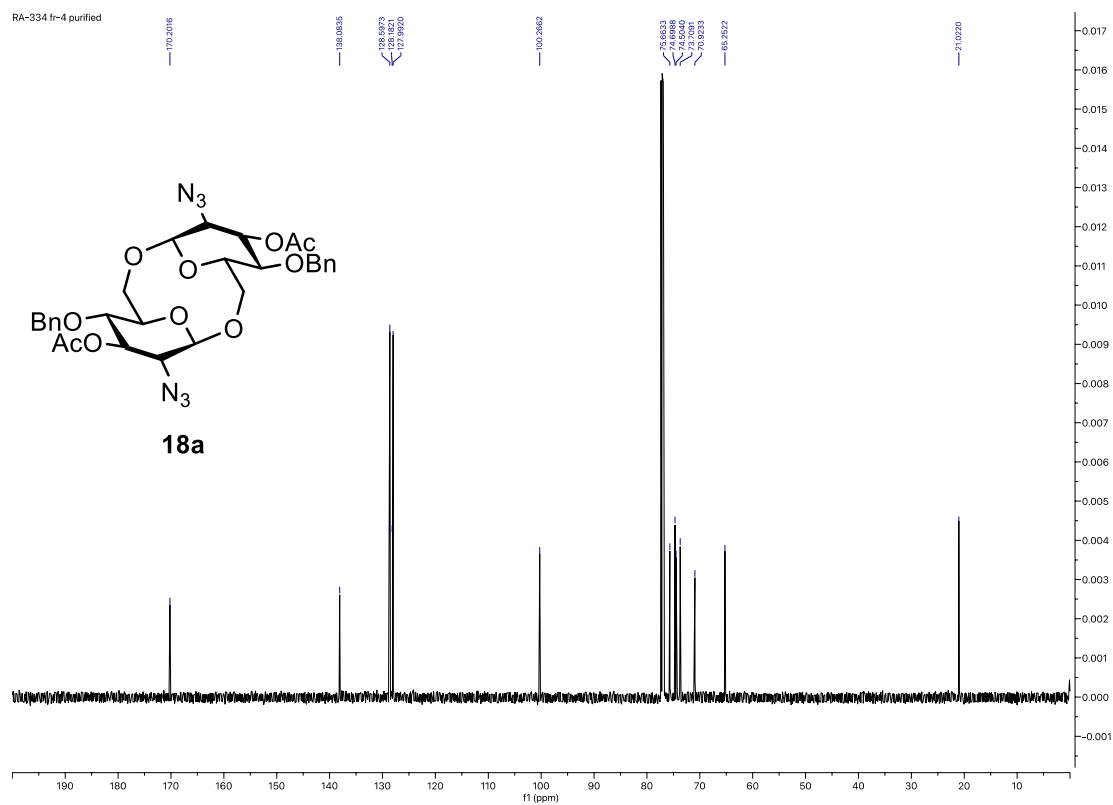



$^1\text{H}$ ,  $^1\text{H}$ -COSY

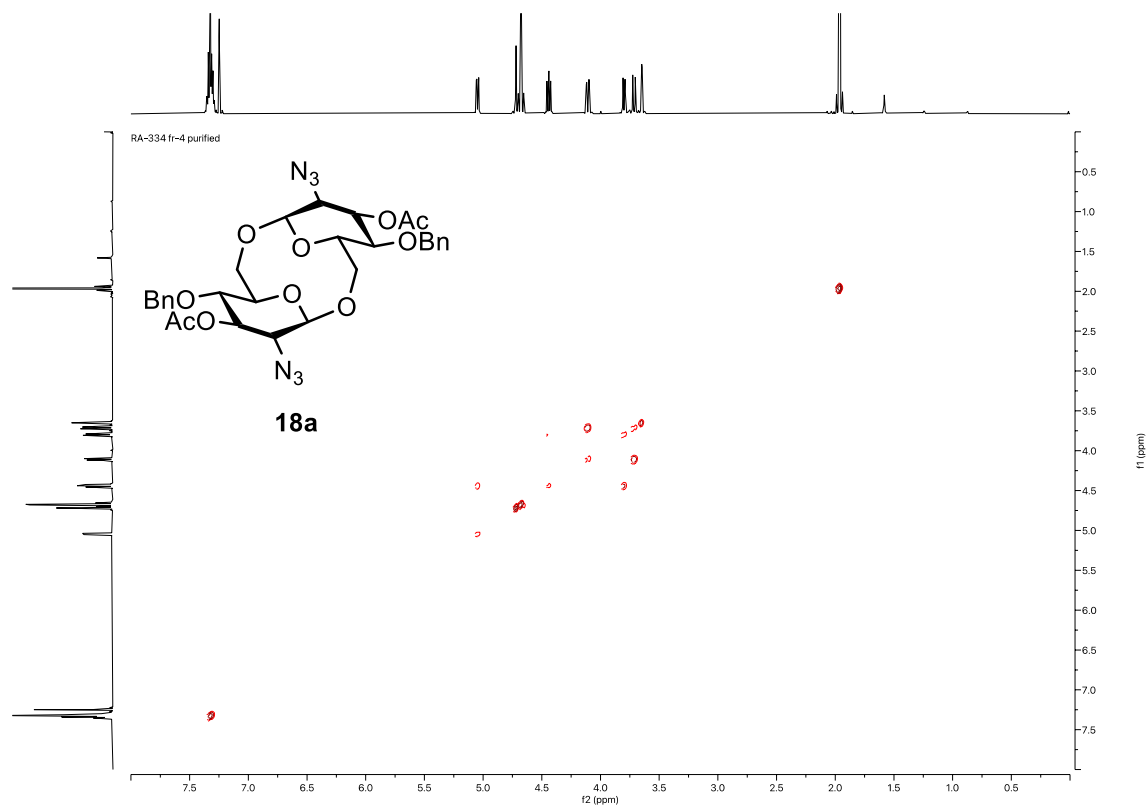

HMQC

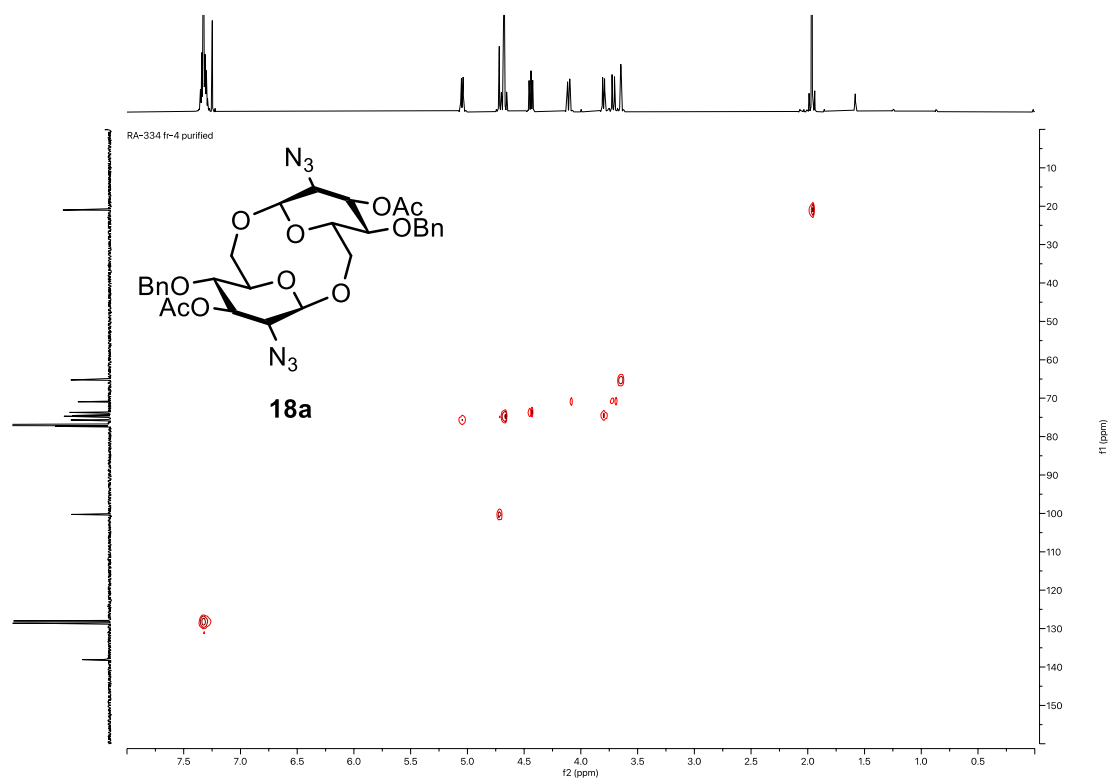

# <sup>1</sup>H NMR

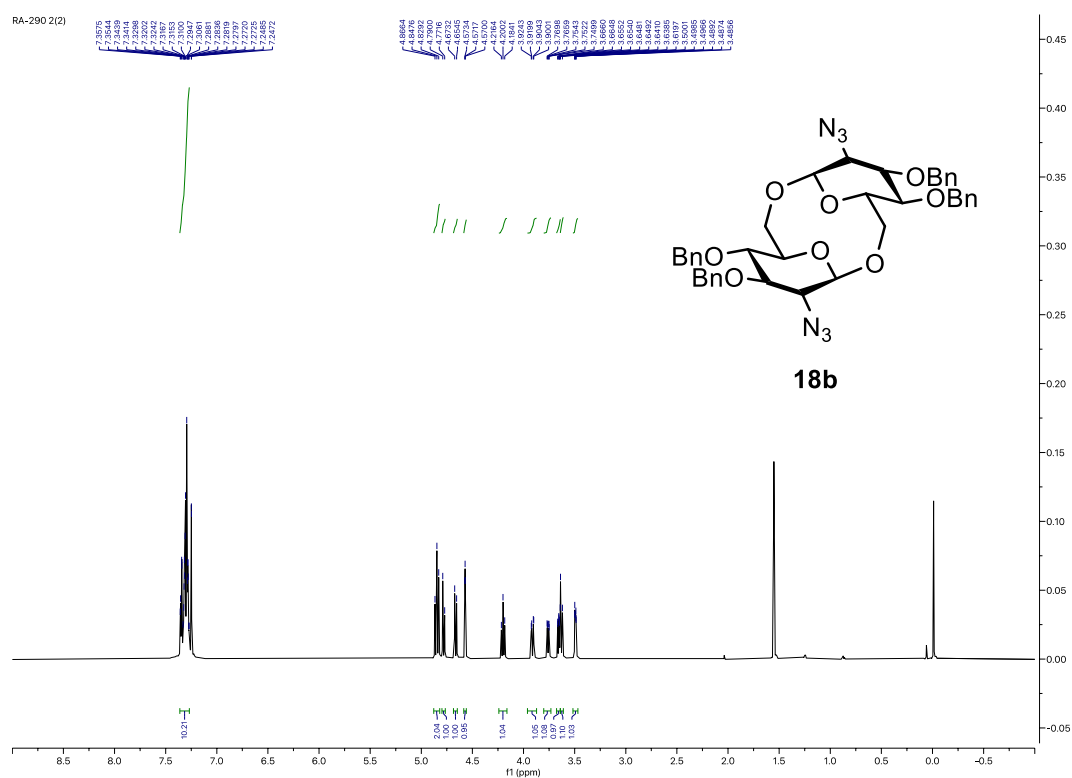

# <sup>13</sup>C NMR

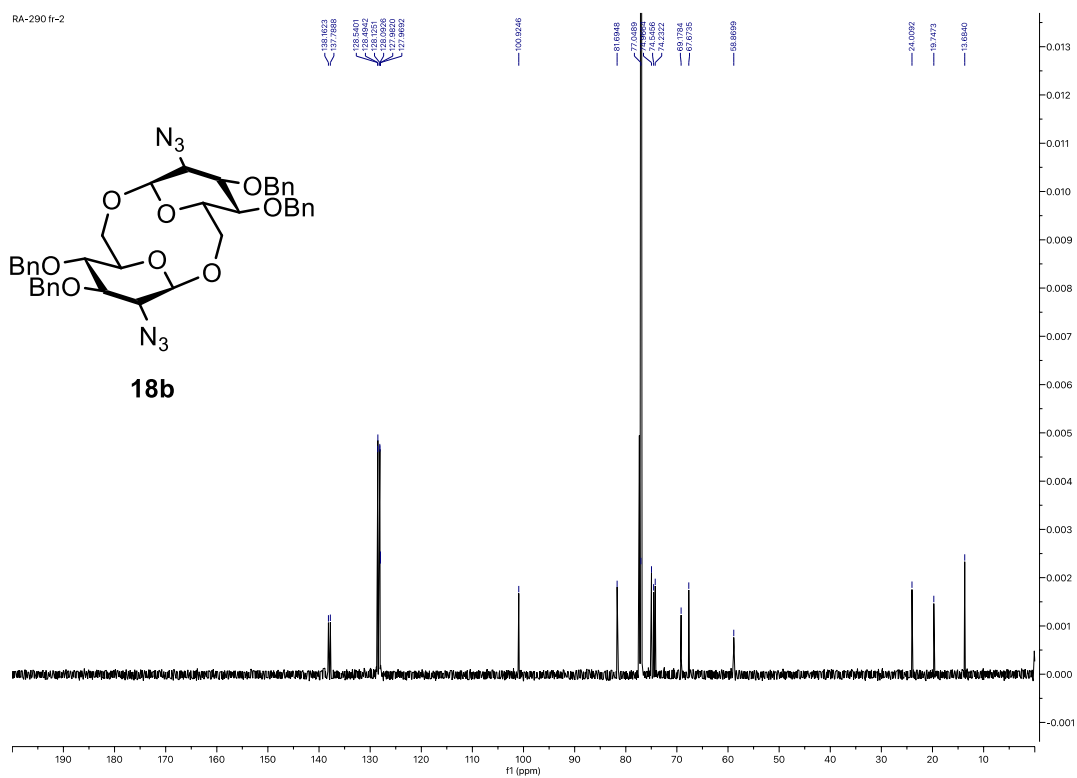

$^1\text{H}$ ,  $^1\text{H}$ -COSY

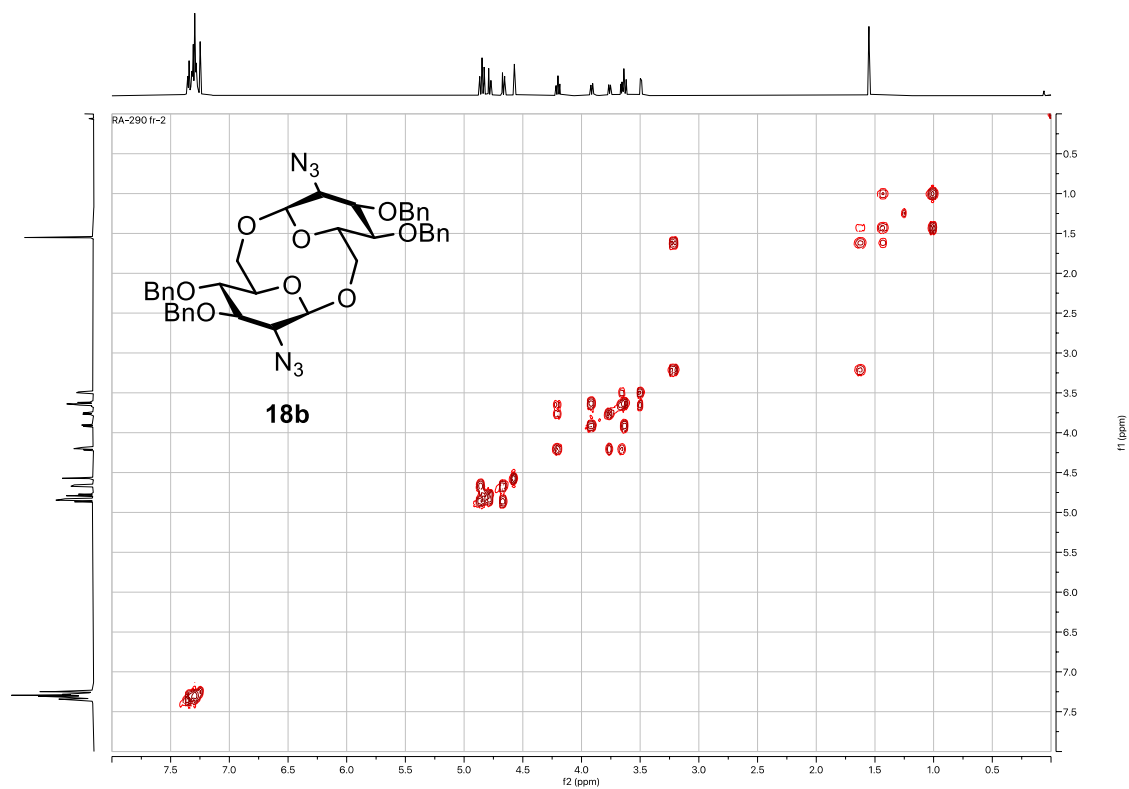

HMQC

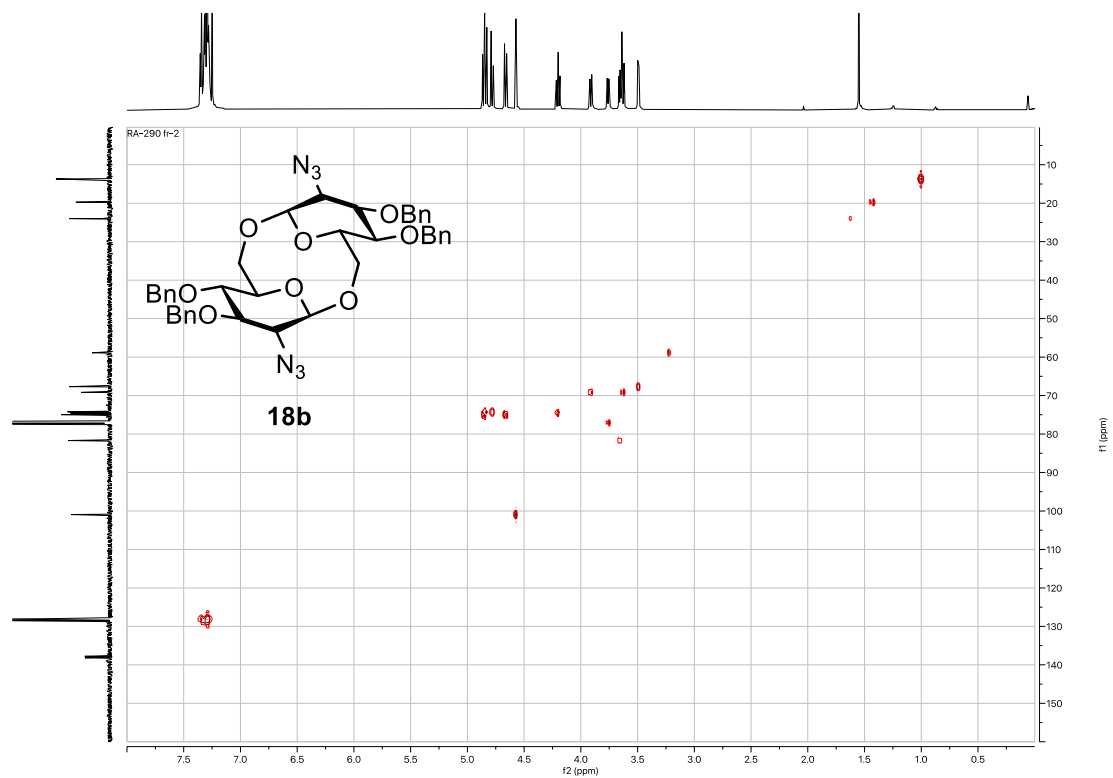

# <sup>1</sup>H NMR

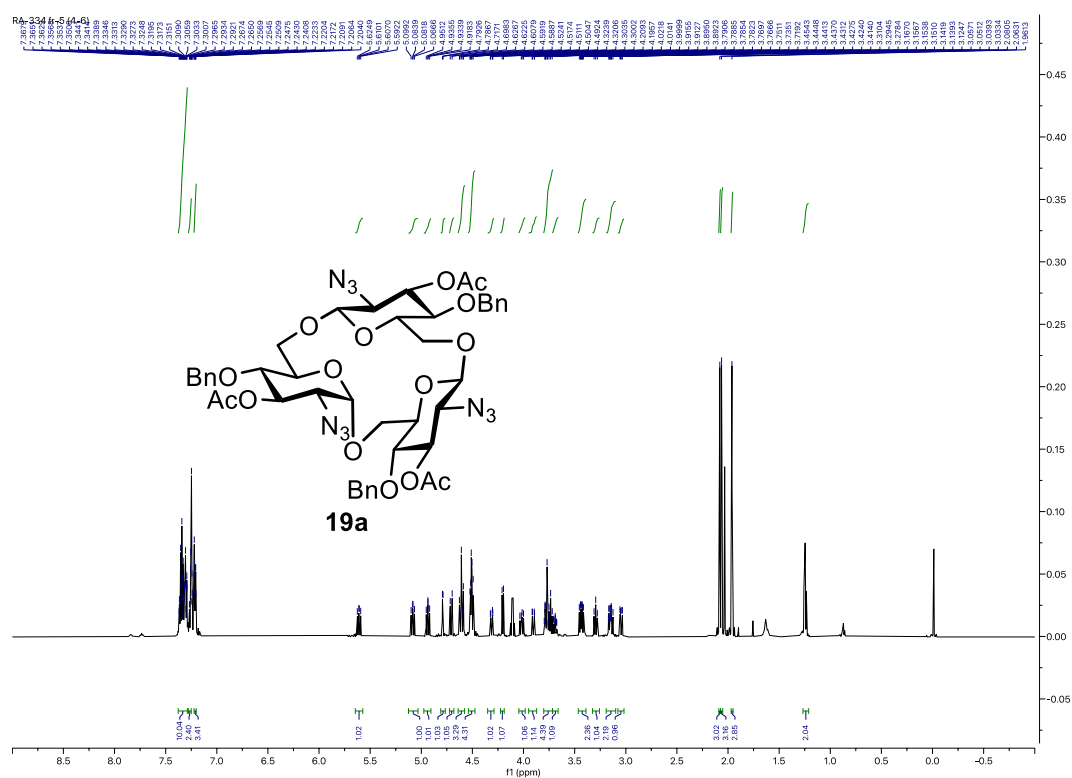

# <sup>13</sup>C NMR

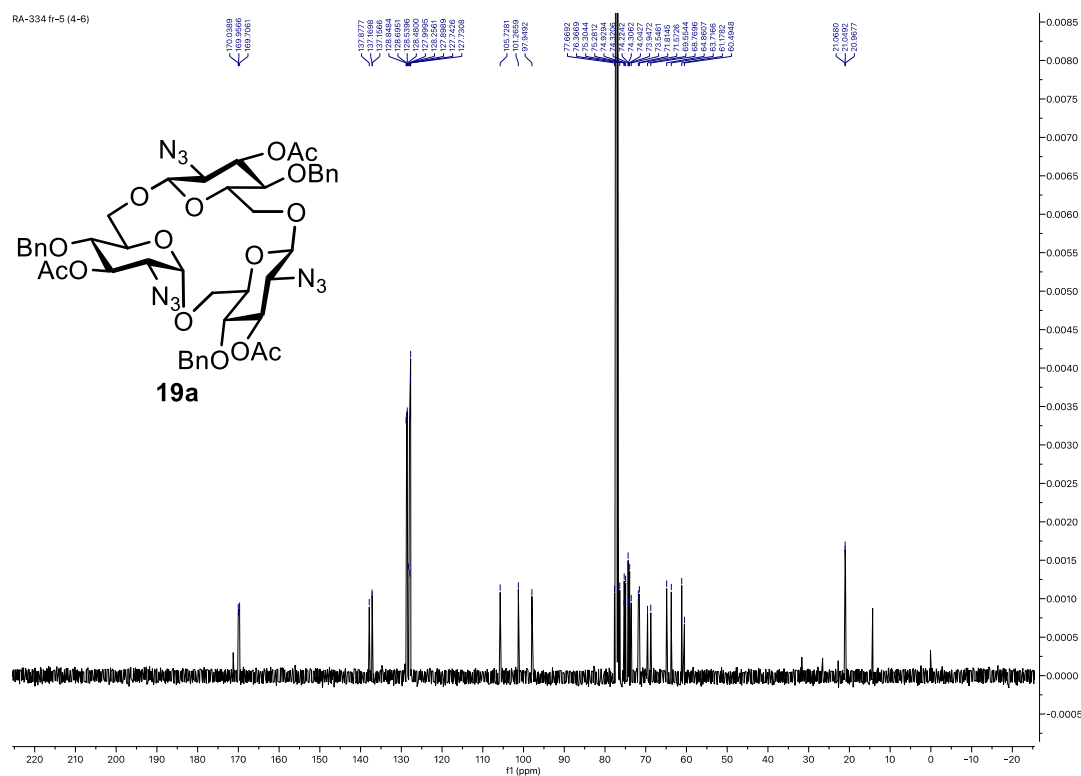

$^1\text{H}$ ,  $^1\text{H}$ -COSY

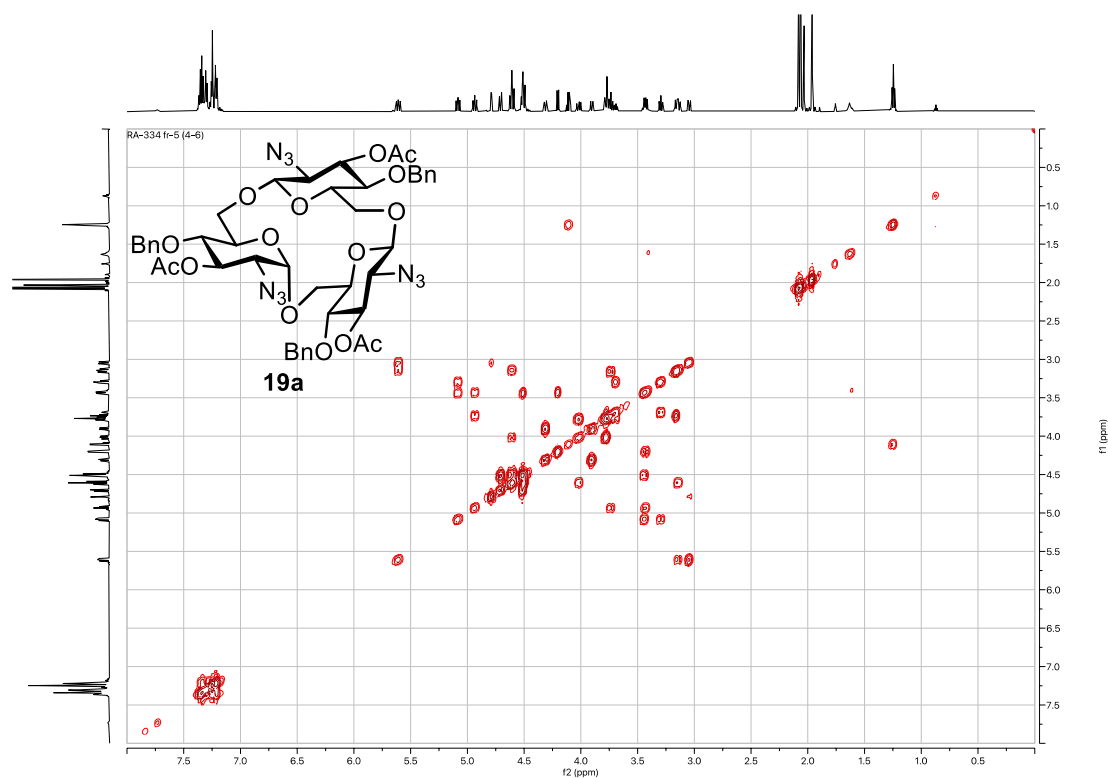

HMQC

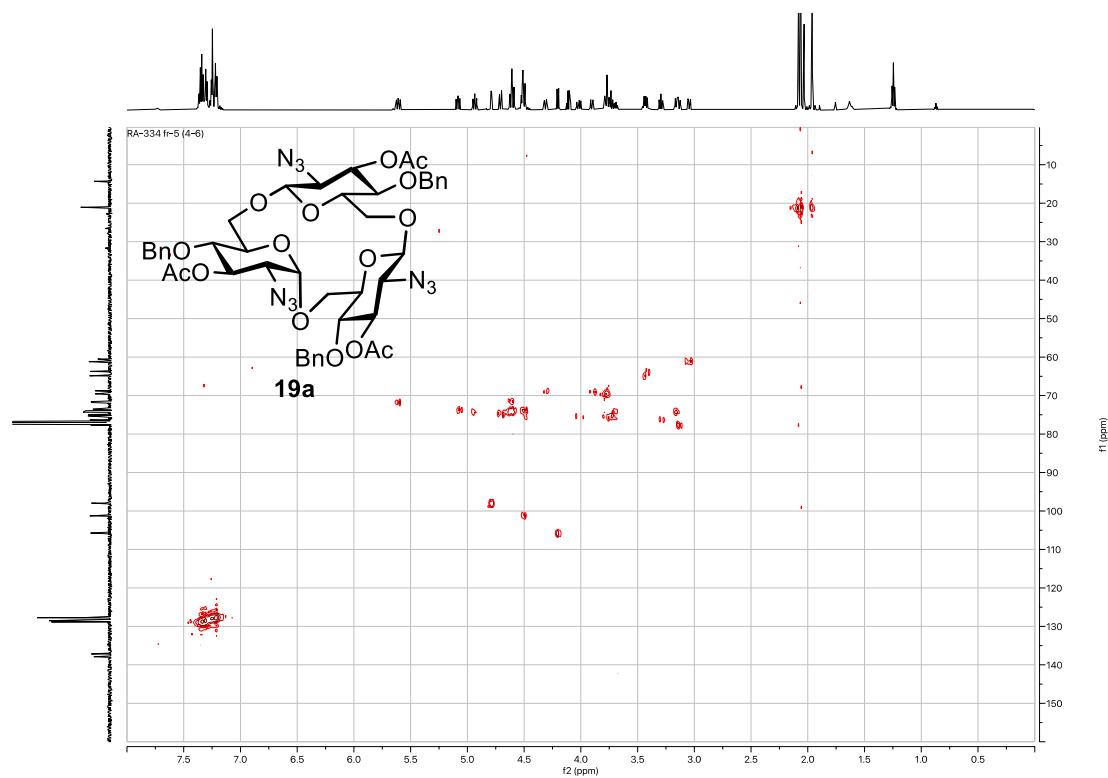

<sup>1</sup>H NMR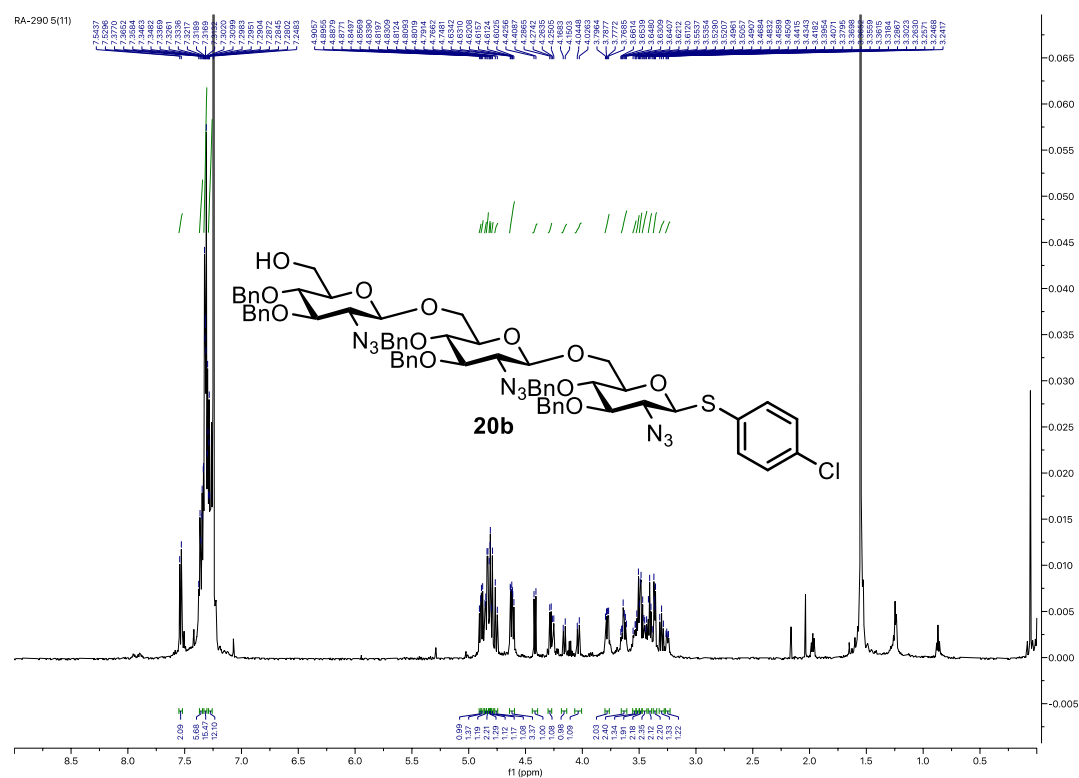<sup>13</sup>C NMR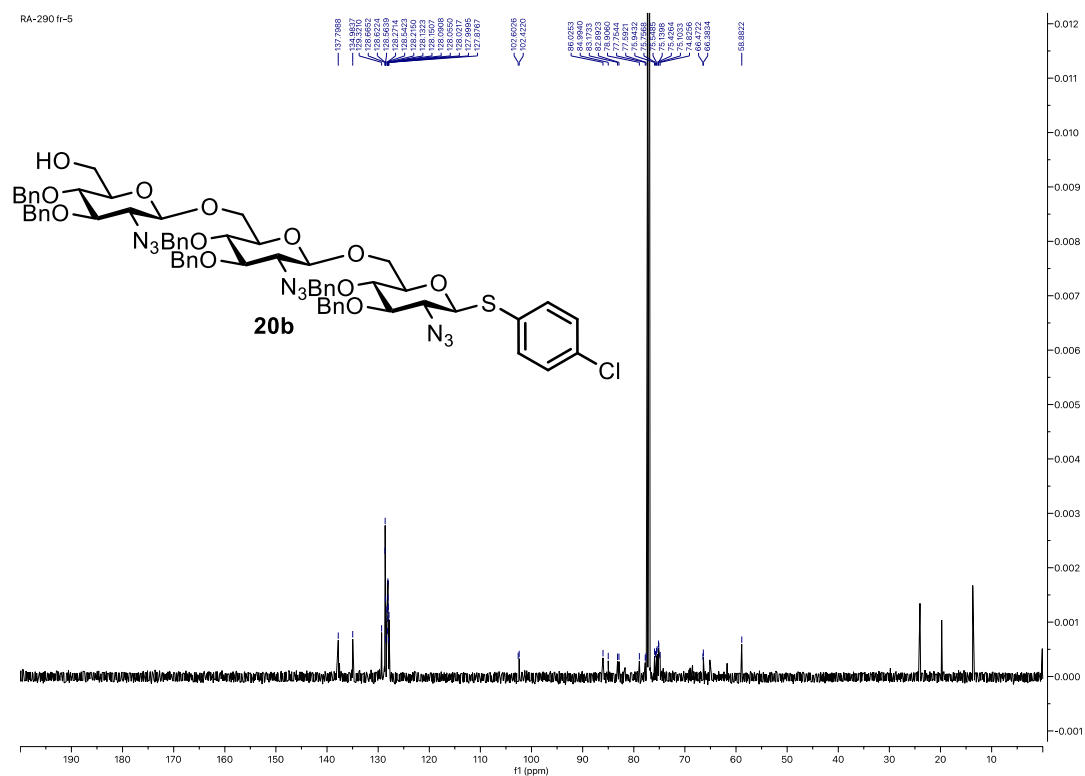

$^1\text{H}$ ,  $^1\text{H}$ -COSY

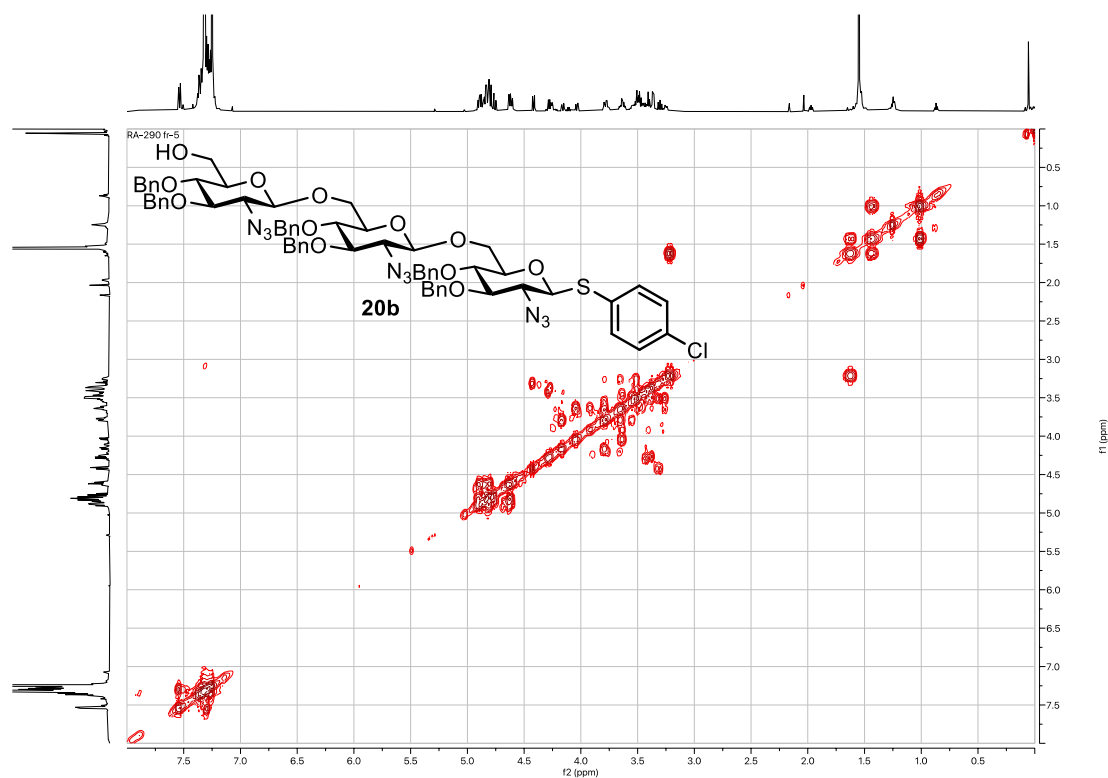

HMQC

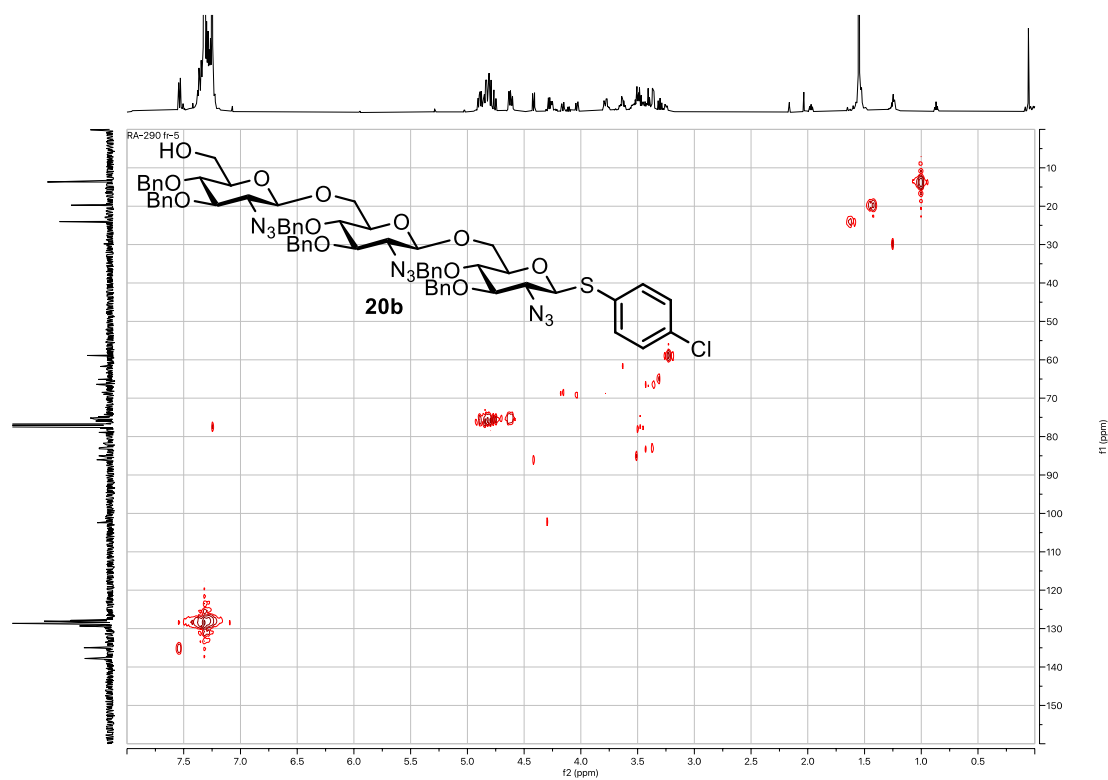

Supplement: Additional file 1 [file 1860-5397-20-124-S1.pdf]
